# Supplementary material for: The combined signatures of hypoxia and cellular landscape provides a prognostic and therapeutic biomarker in hepatitis B virus‐related hepatocellular carcinoma
Source: PubMed Central journal article supplement — Int J Cancer. 2022 May 9;151(5):809–24. doi: 10.1002/ijc.34045 (PMC9543189; doi:10.1002/ijc.34045), 2022-05-09
Supplement: IJC-151-809-s002.pdf [file IJC-151-809-s002.pdf]

# The Combined Signatures of Hypoxia and Cellular Landscape Provides a Prognostic and Therapeutic Biomarker in HBV-Related Hepatocellular Carcinoma

Shipeng Chen\*, Yuzhen Gao\*, Ying Wang, Toos Daemen

## Supplementary Tables 1-14

### Contents

|                                                                                                                   |
|-------------------------------------------------------------------------------------------------------------------|
| S1. Basic information of HBV-related HCC cohorts and other included datasets.                                     |
| S2. Prognostic value of Hypoxia-related genes in five HBV-related HCC cohorts (n=596).                            |
| S3. Prognostic value of 64 TME cells in five HBV-related HCC cohorts (n=596).                                     |
| S4. Pooled prognostic value of Hypoxia-related genes based on pooled four training cohorts (meta-analysis,n=452). |
| S5. Pooled prognostic value of TME cells based on pooled four training cohorts (meta-analysis,n=452).             |
| S6. The enrichment score of immune-related gene sets for HBV-related HCC cohorts.                                 |
| S7. The correlation of Hypoxia score and TME score in 21 HCC cohorts and 5 HBV-related HCC cohorts.               |
| S8. The detailed Hypoxia-TME score of all included HBV-related HCC patients (n=596).                              |
| S9. The cox regression analysis of Hypoxia-TME score in all HBV-related HCC cohorts.                              |
| S10. Pan-cancer cox results of Hypoxia-TME classifier with overall survival (32 cohorts).                         |
| S11. The KEGG pathway analysis of High hypoxia score vs Low hypoxia score in HBV-related HCC cohorts.             |
| S12. The KEGG pathway analysis of High TME score vs Low TME score in HBV-related HCC cohorts.                     |
| S13. The KEGG pathway analysis of Hypoxia-TME subgroups in HBV-related HCC cohorts.                               |
| S14. Other HCC-related molecular classification gene sets signature (n=87) in the MSigDB used in current study.   |

**S1. Basical information of HBV-related HCC cohorts and other included datasets**

| Source                     | Platform                                                     | Platforms | Total number of patients | HBV-related HCC | HCV-related HCC | Prognosis data | Notes                                                                         |
|----------------------------|--------------------------------------------------------------|-----------|--------------------------|-----------------|-----------------|----------------|-------------------------------------------------------------------------------|
| <b>Four different sets</b> |                                                              |           |                          |                 |                 |                |                                                                               |
| GSE14520                   | Affymetrix Human Genome U133A 2.0 Array                      | GPL571    | 221                      | 221             | 0               | Yes            | mRNA data,clinical data                                                       |
| GSE10143                   | Human 6k Transcriptionally Informative Gene Panel for DASL   | GPL5474   | 80                       | 19              | 58              | Yes            | mRNA data,clinical data                                                       |
| ICGC-LIRI-JP               | RNA-Seq                                                      | -         | 212                      | 53              | 117             | Yes            | mRNA data,clinical data                                                       |
| Gao_fudan                  | RNA-Seq                                                      | -         | 159                      | 159             | 0               | Yes            | mRNA data,SNV data,clinical data,doi.org/10.1016/j.cell.2019.08.052           |
| <b>Validataion set</b>     |                                                              |           |                          |                 |                 |                |                                                                               |
| TCGA-LIHC                  | RNA-Seq                                                      | -         | 368                      | 144             | 95              | Yes            | mRNA data,SNV data,clinical data                                              |
| <b>Treatment sets</b>      |                                                              |           |                          |                 |                 |                |                                                                               |
| GSE109211                  | Illumina HumanHT-12 WG-DASL V4.0 expression bead chip        | GPL13938  | 140                      | NA              | NA              | NO             | SorafenibTtreatment                                                           |
| GSE35640                   | [HG-U133_Plus_2] Affymetrix Human Genome U133 Plus 2.0 Array | GPL570    | 65                       | NA              | NA              | NO             | MAGE-A3 immunotherapy                                                         |
| <b>Pan-Cancer data</b>     |                                                              |           |                          |                 |                 |                |                                                                               |
| TCGA-PanCancer             | RNA-Seq                                                      | -         | 8834                     | NA              | NA              | Yes            | Download from <a href="https://xenabrowser.net/">https://xenabrowser.net/</a> |
| <b>Other HCC sets</b>      |                                                              |           |                          |                 |                 |                |                                                                               |
| GSE76427                   | Illumina HumanHT-12 V4.0 expression bead chip                | GPL10558  | 115                      | NA              | NA              | Yes            | mRNA data,clinical data                                                       |
| GSE112790                  | Affymetrix Human Genome U133 Plus 2.0 Array                  | GPL570    | 198                      | NA              | NA              | No             | mRNA data                                                                     |
| GSE9843                    | Affymetrix Human Genome U133 Plus 2.0 Array                  | GPL570    | 91                       | NA              | NA              | No             | mRNA data                                                                     |
| GSE19977                   | Illumina HumanRef-8 WG-DASL v3.0                             | GPL8432   | 164                      | NA              | NA              | No             | mRNA data                                                                     |
| GSE22058                   | Rosetta/Merck Human RSTA Custom Affymetrix 1.0 microarray    | GPL6793   | 96                       | NA              | NA              | No             | mRNA data                                                                     |
| GSE25097                   | Rosetta/Merck Human RSTA Affymetrix 1.0 microarray           | GPL10687  | 268                      | NA              | NA              | No             | mRNA data                                                                     |
| GSE43619                   | Illumina HumanHT-12 V4.0 expression bead chip                | GPL10558  | 88                       | NA              | NA              | No             | mRNA data                                                                     |
| GSE45267                   | Affymetrix Human Genome U133 Plus 2.0 Array                  | GPL570    | 87                       | NA              | NA              | No             | mRNA data                                                                     |
| GSE46444                   | Illumina Human Whole-Genome DASL HT                          | GPL13369  | 88                       | NA              | NA              | No             | mRNA data                                                                     |
| GSE54236                   | Agilent-014850 Whole Human Genome Microarray 4x44K G4112F    | GPL6480   | 81                       | NA              | NA              | No             | mRNA data                                                                     |
| GSE63898                   | Affymetrix Human Genome U219 Array                           | GPL13667  | 228                      | NA              | NA              | No             | mRNA data                                                                     |
| GSE64041                   | Affymetrix Human Gene 1.0 ST Array                           | GPL6244   | 60                       | NA              | NA              | No             | mRNA data                                                                     |
| GSE84402                   | Affymetrix Human Genome U133 Plus 2.0 Array                  | GPL570    | 14                       | NA              | NA              | No             | mRNA data                                                                     |

S2. Prognostic value of Hypoxia-related genes in five HBV-related HCC cohorts (n=596)

| Hypoxia-related genes | Description                                                                     | Four training cohorts |        |                    |        |                     |       |                     |       | Validation cohort   |        |
|-----------------------|---------------------------------------------------------------------------------|-----------------------|--------|--------------------|--------|---------------------|-------|---------------------|-------|---------------------|--------|
|                       |                                                                                 | GSE14520(n=221)       |        | Gao et al(n=159)   |        | ICGC_LIRI_JP(n=53)  |       | GSE10143(n=19)      |       | TCGA_LIHC(n=144)    |        |
|                       |                                                                                 | HR95%CI               | P      | HR95%CI            | P      | HR95%CI             | P     | HR95%CI             | P     | HR95%CI             | P      |
| AKT1                  | AKT serine/threonine kinase 1 [KO:K04456] [EC:2.7.11.1]                         | 0.553(0.354-0.863)    | 0.009  | 1.342(0.793-2.272) | 0.273  | /                   | /     | 0.616(0.152-2.492)  | 0.497 | 1.844(0.875-3.886)  | 0.108  |
| AKT2                  | AKT serine/threonine kinase 2 [KO:K04456] [EC:2.7.11.1]                         | 0.701(0.388-1.267)    | 0.24   | 1.124(0.65-1.943)  | 0.676  | 0.255(0.031-2.073)  | 0.201 | 1.318(0.327-5.316)  | 0.698 | 0.501(0.248-1.014)  | 0.055  |
| AKT3                  | AKT serine/threonine kinase 3 [KO:K04456] [EC:2.7.11.1]                         | 1.585(0.959-2.617)    | 0.072  | /                  | /      | 0.197(0.049-0.794)  | 0.022 | 3.47(0.697-17.279)  | 0.129 | 0.679(0.346-1.333)  | 0.26   |
| ALDOA                 | aldolase, fructose-bisphosphate A [KO:K01623] [EC:4.1.2.13]                     | 1.841(0.453-7.487)    | 0.394  | 3.058(1.798-5.203) | <0.001 | 0.278(0.056-1.378)  | 0.117 | 2.709(0.555-13.219) | 0.218 | 2.53(1.434-4.463)   | 0.001  |
| ALDOB                 | aldolase, fructose-bisphosphate B [KO:K01623] [EC:4.1.2.13]                     | 0.505(0.324-0.786)    | 0.002  | 1.822(1.039-3.196) | 0.036  | 0.341(0.042-2.769)  | 0.314 | 4.192(1.014-17.334) | 0.048 | 0.708(0.394-1.27)   | 0.247  |
| ALDOC                 | aldolase, fructose-bisphosphate C [KO:K01623] [EC:4.1.2.13]                     | 1.921(1.02-3.621)     | 0.043  | 0.838(0.493-1.423) | 0.512  | 0.211(0.046-0.982)  | 0.047 | 1.098(0.273-4.417)  | 0.895 | 2.078(1.236-3.496)  | 0.006  |
| ANGPT1                | angiopoietin 1 [KO:K05465]                                                      | 2.219(1.302-3.78)     | 0.003  | /                  | /      | 2.154(0.538-8.617)  | 0.278 | 0.463(0.096-2.236)  | 0.338 | 2.436(1.312-4.523)  | 0.005  |
| ANGPT2                | angiopoietin 2 [KO:K05466]                                                      | 4.303(1.742-10.629)   | 0.002  | /                  | /      | /                   | /     | 0.445(0.084-2.361)  | 0.342 | 2.397(1.221-4.707)  | 0.011  |
| ANGPT4                | angiopoietin 4 [KO:K05467]                                                      | 0.498(0.289-0.858)    | 0.012  | /                  | /      | /                   | /     | /                   | /     | 0.374(0.227-0.616)  | <0.001 |
| ARNT                  | aryl hydrocarbon receptor nuclear translocator [KO:K09097]                      | 2.37(1.033-5.437)     | 0.042  | 1.698(0.999-2.888) | 0.05   | 0.22(0.044-1.102)   | 0.065 | 0.257(0.032-2.061)  | 0.201 | 3.632(1.273-10.361) | 0.016  |
| BCL2                  | BCL2 apoptosis regulator [KO:K02161]                                            | 0.669(0.363-1.231)    | 0.196  | /                  | /      | 0.291(0.058-1.448)  | 0.132 | 0.398(0.082-1.933)  | 0.253 | 0.736(0.45-1.203)   | 0.221  |
| CAMK2A                | calcium/calmodulin dependent protein kinase II alpha [KO:K04515] [EC:2.7.11.17] | 0.54(0.351-0.83)      | 0.005  | /                  | /      | 5.067(1.022-25.115) | 0.047 | 3.304(0.8-13.639)   | 0.099 | 0.602(0.272-1.331)  | 0.21   |
| CAMK2B                | calcium/calmodulin dependent protein kinase II beta [KO:K04515] [EC:2.7.11.17]  | 0.447(0.28-0.715)     | 0.001  | 1.358(0.188-9.823) | 0.762  | 0.157(0.019-1.283)  | 0.084 | /                   | /     | 0.332(0.161-0.683)  | 0.003  |
| CAMK2D                | calcium/calmodulin dependent protein kinase II delta [KO:K04515] [EC:2.7.11.17] | /                     | /      | 0.403(0.207-0.782) | 0.007  | 4.41(0.542-35.873)  | 0.165 | /                   | /     | 1.717(1.011-2.916)  | 0.046  |
| CAMK2G                | calcium/calmodulin dependent protein kinase II gamma [KO:K04515] [EC:2.7.11.17] | 1.431(0.83-2.465)     | 0.197  | 1.013(0.524-1.959) | 0.969  | 0.346(0.07-1.717)   | 0.194 | 0.531(0.14-2.02)    | 0.353 | 2.131(0.937-4.846)  | 0.071  |
| CDKN1A                | cyclin dependent kinase inhibitor 1A [KO:K06625]                                | 1.22(0.784-1.898)     | 0.378  | /                  | /      | 4.146(0.99-17.368)  | 0.052 | 8.135(0.737-89.855) | 0.087 | 0.397(0.239-0.66)   | <0.001 |
| CDKN1B                | cyclin dependent kinase inhibitor 1B [KO:K06624]                                | 0.578(0.374-0.892)    | 0.013  | 2.087(1.052-4.138) | 0.035  | /                   | /     | /                   | /     | 2.188(1.255-3.813)  | 0.006  |
| CREBBP                | CREB binding protein [KO:K04498] [EC:2.3.1.48]                                  | 0.509(0.33-0.785)     | 0.002  | 0.667(0.327-1.362) | 0.266  | /                   | /     | 0.844(0.21-3.385)   | 0.811 | 1.71(1.025-2.854)   | 0.04   |
| CUL2                  | cullin 2 [KO:K03870]                                                            | 0.715(0.459-1.112)    | 0.136  | 1.844(1.077-3.158) | 0.026  | 0.239(0.048-1.197)  | 0.082 | 0.632(0.157-2.533)  | 0.517 | 2.612(1.514-4.506)  | 0.001  |
| CYBB                  | cytochrome b-245 beta chain [KO:K21421] [EC:1.-.-.-]                            | 0.758(0.489-1.176)    | 0.217  | 2.153(1.054-4.398) | 0.035  | 2.492(0.502-12.376) | 0.264 | 1.631(0.403-6.597)  | 0.493 | 1.755(1.05-2.935)   | 0.032  |
| EDN1                  | endothelin 1 [KO:K16366]                                                        | 1.613(0.968-2.688)    | 0.066  | /                  | /      | /                   | /     | /                   | /     | 2.182(1.107-4.298)  | 0.024  |
| EGF                   | epidermal growth factor [KO:K04357]                                             | 2.044(1.318-3.169)    | 0.001  | /                  | /      | /                   | /     | /                   | /     | 2.044(1.211-3.449)  | 0.007  |
| EGFR                  | epidermal growth factor receptor [KO:K04361] [EC:2.7.10.1]                      | 0.1(0.014-0.721)      | 0.022  | 1.203(0.568-2.544) | 0.629  | /                   | /     | /                   | /     | 0.652(0.383-1.108)  | 0.114  |
| EGLN1                 | egl-9 family hypoxia inducible factor 1 [KO:K09592] [EC:1.14.11.29]             | 2.129(1.216-3.728)    | 0.008  | 1.575(0.915-2.71)  | 0.101  | 82434629.391(0-Inf) | 0.998 | /                   | /     | 2.289(1.114-4.7)    | 0.024  |
| EGLN2                 | egl-9 family hypoxia inducible factor 2 [KO:K09592] [EC:1.14.11.29]             | /                     | /      | /                  | /      | 0.288(0.069-1.205)  | 0.088 | /                   | /     | 0.79(0.39-1.599)    | 0.513  |
| EGLN3                 | egl-9 family hypoxia inducible factor 3 [KO:K09592] [EC:1.14.11.29]             | 2.505(1.625-3.86)     | <0.001 | /                  | /      | 0.24(0.057-1.003)   | 0.05  | /                   | /     | 0.404(0.169-0.963)  | 0.041  |
| EIF4E                 | eukaryotic translation initiation factor 4E [KO:K03259]                         | 1.429(0.927-2.201)    | 0.106  | 0.699(0.353-1.385) | 0.305  | 0.34(0.068-1.691)   | 0.187 | /                   | /     | 2.55(1.551-4.193)   | <0.001 |
| EIF4E1B               | eukaryotic translation initiation factor 4E family member 1B [KO:K03259]        | /                     | /      | /                  | /      | /                   | /     | /                   | /     | 1.458(0.836-2.543)  | 0.184  |
| EIF4E2                | eukaryotic translation initiation factor 4E family member 2 [KO:K03259]         | 1.484(0.969-2.275)    | 0.07   | 2.641(1.543-4.523) | <0.001 | /                   | /     | /                   | /     | 2.486(1.475-4.191)  | 0.001  |
| EIF4EBP1              | eukaryotic translation initiation factor 4E binding protein 1 [KO:K07205]       | 1.482(0.905-2.427)    | 0.118  | 1.459(0.86-2.473)  | 0.161  | 3.349(0.783-14.322) | 0.103 | /                   | /     | 1.457(0.756-2.806)  | 0.261  |
| ELOB                  | elongin B [KO:K03873]                                                           | 0.565(0.368-0.87)     | 0.009  | 1.652(0.914-2.986) | 0.096  | /                   | /     | /                   | /     | 2.302(1.378-3.845)  | 0.001  |
| ELOC                  | elongin C [KO:K03872]                                                           | 1.606(0.98-2.631)     | 0.06   | 1.368(0.779-2.403) | 0.275  | /                   | /     | /                   | /     | 2.308(1.405-3.789)  | 0.001  |
| ENO1                  | enolase 1 [KO:K01689] [EC:4.2.1.11]                                             | 1.271(0.613-2.633)    | 0.519  | 2.534(1.306-4.915) | 0.006  | 0.234(0.047-1.179)  | 0.078 | /                   | /     | /                   | /      |
| ENO2                  | enolase 2 [KO:K01689] [EC:4.2.1.11]                                             | 2.786(1.775-4.372)    | <0.001 | 3.099(1.747-5.497) | <0.001 | 0.082(0.01-0.668)   | 0.019 | 0.396(0.08-1.962)   | 0.256 | 0.408(0.237-0.704)  | 0.001  |
| ENO3                  | enolase 3 [KO:K01689] [EC:4.2.1.11]                                             | 2.024(1.261-3.248)    | 0.003  | 3.129(1.845-5.307) | <0.001 | 0.173(0.041-0.729)  | 0.017 | 9.415(1.117-79.339) | 0.039 | 2.651(1.597-4.399)  | <0.001 |
| ENO4                  | enolase 4 [KO:K01689] [EC:4.2.1.11]                                             | /                     | /      | /                  | /      | 0.214(0.043-1.069)  | 0.06  | /                   | /     | 2.205(1.342-3.625)  | 0.002  |
| EP300                 | E1A binding protein p300 [KO:K04498] [EC:2.3.1.48]                              | 1.68(1.047-2.695)     | 0.031  | 2.283(1.35-3.859)  | 0.002  | 0.37(0.092-1.493)   | 0.162 | 0.137(0.016-1.19)   | 0.071 | 0.598(0.357-1.001)  | 0.051  |
| EPO                   | erythropoietin [KO:K05437]                                                      | 3.357(2.065-5.456)    | <0.001 | /                  | /      | 3.009(0.752-12.05)  | 0.12  | /                   | /     | 0.649(0.389-1.083)  | 0.098  |
| ERBB2                 | erb-b2 receptor tyrosine kinase 2 [KO:K05083] [EC:2.7.10.1]                     | 0.658(0.382-1.133)    | 0.131  | 1.55(0.884-2.718)  | 0.126  | 0.229(0.055-0.959)  | 0.044 | 0.419(0.103-1.71)   | 0.225 | 1.636(0.962-2.782)  | 0.069  |
| FLT1                  | fms related tyrosine kinase 1 [KO:K05096] [EC:2.7.10.1]                         | 1.639(1.064-2.525)    | 0.025  | /                  | /      | 0.286(0.058-1.422)  | 0.126 | /                   | /     | 3.999(1.243-12.862) | 0.02   |
| GAPDH                 | glyceraldehyde-3-phosphate dehydrogenase [KO:K00134] [EC:1.2.1.12]              | 2.337(1.484-3.682)    | <0.001 | 0.987(0.546-1.783) | 0.964  | 0.525(0.131-2.1)    | 0.362 | 0.334(0.069-1.627)  | 0.175 | 1.33(0.764-2.315)   | 0.314  |
| HIF1A                 | hypoxia inducible factor 1 subunit alpha [KO:K08268]                            | 1.637(0.962-2.786)    | 0.069  | /                  | /      | 0.261(0.053-1.296)  | 0.1   | 0.15(0.03-0.741)    | 0.02  | 2.031(1.248-3.306)  | 0.004  |

S2. Prognostic value of Hypoxia-related genes in five HBV-related HCC cohorts (n=596)

| Hypoxia-related genes | Description                                                                               | Four training cohorts |        |                    |        |                     |       |                       |       | Validation cohort  |        |
|-----------------------|-------------------------------------------------------------------------------------------|-----------------------|--------|--------------------|--------|---------------------|-------|-----------------------|-------|--------------------|--------|
|                       |                                                                                           | GSE14520(n=221)       |        | Gao et al(n=159)   |        | ICGC_LIRI_JP(n=53)  |       | GSE10143(n=19)        |       | TCGA_LIHC(n=144)   |        |
|                       |                                                                                           | HR95%CI               | P      | HR95%CI            | P      | HR95%CI             | P     | HR95%CI               | P     | HR95%CI            | P      |
| HK1                   | hexokinase 1 [KO:K00844] [EC:2.7.1.1]                                                     | 0.491(0.311-0.776)    | 0.002  | 2.98(1.537-5.776)  | 0.001  | 0.111(0.014-0.903)  | 0.04  | 0.515(0.138-1.919)    | 0.323 | 0.991(0.584-1.684) | 0.975  |
| HK2                   | hexokinase 2 [KO:K00844] [EC:2.7.1.1]                                                     | 2.795(1.659-4.709)    | <0.001 | 2.742(1.62-4.642)  | <0.001 | 0.208(0.049-0.875)  | 0.032 | 6.287(0.777-50.872)   | 0.085 | 0.473(0.289-0.774) | 0.003  |
| HK3                   | hexokinase 3 [KO:K00844] [EC:2.7.1.1]                                                     | 0.558(0.303-1.028)    | 0.061  | 2.103(1.087-4.07)  | 0.027  | 0.245(0.058-1.047)  | 0.058 | 0.803(0.098-6.585)    | 0.838 | 2.08(1.2-3.604)    | 0.009  |
| HKDC1                 | hexokinase domain containing 1 [KO:K00844] [EC:2.7.1.1]                                   | 1.535(0.957-2.463)    | 0.076  | 1.687(0.723-3.936) | 0.227  | 3.211(0.648-15.914) | 0.153 | /                     | /     | 1.331(0.772-2.293) | 0.303  |
| HMOX1                 | heme oxygenase 1 [KO:K00510] [EC:1.14.14.18]                                              | 2.193(1.315-3.659)    | 0.003  | 1.419(0.443-4.545) | 0.555  | 6.269(1.264-31.093) | 0.025 | 3.765(0.775-18.293)   | 0.1   | 2.196(1.245-3.873) | 0.007  |
| IFNG                  | interferon gamma [KO:K04687]                                                              | 0.577(0.339-0.983)    | 0.043  | /                  | /      | 0.18(0.022-1.467)   | 0.109 | /                     | /     | 2.174(1.295-3.649) | 0.003  |
| IFNGR1                | interferon gamma receptor 1 [KO:K05132]                                                   | 0.759(0.488-1.18)     | 0.22   | /                  | /      | 4.457(1.063-18.683) | 0.041 | 0.306(0.074-1.267)    | 0.102 | 0.866(0.373-2.013) | 0.739  |
| IFNGR2                | interferon gamma receptor 2 [KO:K05133]                                                   | 2.073(1.168-3.679)    | 0.013  | /                  | /      | 0.411(0.103-1.646)  | 0.209 | 0.28(0.074-1.062)     | 0.061 | 0.476(0.173-1.312) | 0.151  |
| IGF1                  | insulin like growth factor 1 [KO:K05459]                                                  | 0.519(0.339-0.796)    | 0.003  | /                  | /      | 6.99(0.858-56.982)  | 0.069 | 0.278(0.056-1.388)    | 0.119 | 1.678(0.998-2.82)  | 0.051  |
| IGF1R                 | insulin like growth factor 1 receptor [KO:K05087] [EC:2.7.10.1]                           | 0.558(0.309-1.007)    | 0.053  | /                  | /      | 0.101(0.012-0.82)   | 0.032 | 1.956(0.486-7.872)    | 0.345 | 1.805(0.718-4.532) | 0.209  |
| IL6                   | interleukin 6 [KO:K05405]                                                                 | 0.573(0.374-0.877)    | 0.01   | /                  | /      | 2.497(0.503-12.393) | 0.263 | /                     | /     | 1.829(1.115-3)     | 0.017  |
| IL6R                  | interleukin 6 receptor [KO:K05055]                                                        | 0.52(0.288-0.939)     | 0.03   | /                  | /      | 0.447(0.107-1.873)  | 0.271 | /                     | /     | 0.373(0.227-0.615) | <0.001 |
| INS                   | insulin [KO:K04526]                                                                       | 1.569(0.869-2.833)    | 0.135  | /                  | /      | /                   | /     | /                     | /     | 1.534(0.926-2.542) | 0.097  |
| INSR                  | insulin receptor [KO:K04527] [EC:2.7.10.1]                                                | 2.155(0.994-4.671)    | 0.052  | 1.367(0.722-2.59)  | 0.337  | /                   | /     | /                     | /     | 0.685(0.415-1.13)  | 0.139  |
| LDHA                  | lactate dehydrogenase A [KO:K00016] [EC:1.1.1.27]                                         | 2.055(1.3-3.247)      | 0.002  | 2.418(1.217-4.803) | 0.012  | 2.528(0.509-12.547) | 0.256 | 5.378(1.329-21.763)   | 0.018 | 0.795(0.343-1.847) | 0.595  |
| LDHAL6A               | lactate dehydrogenase A like 6A [KO:K00016] [EC:1.1.1.27]                                 | /                     | /      | /                  | /      | /                   | /     | /                     | /     | 2.932(1.68-5.117)  | <0.001 |
| LDHAL6B               | lactate dehydrogenase A like 6B [KO:K00016] [EC:1.1.1.27]                                 | 1.516(0.925-2.483)    | 0.099  | /                  | /      | 0.095(0.019-0.473)  | 0.004 | /                     | /     | 0.724(0.4-1.311)   | 0.287  |
| LDHB                  | lactate dehydrogenase B [KO:K00016] [EC:1.1.1.27]                                         | 1.878(1.039-3.394)    | 0.037  | 2.434(1.328-4.464) | 0.004  | 0.362(0.086-1.523)  | 0.166 | 0.077(0.009-0.63)     | 0.017 | 1.83(0.87-3.85)    | 0.111  |
| LDHC                  | lactate dehydrogenase C [KO:K00016] [EC:1.1.1.27]                                         | 0.646(0.407-1.025)    | 0.064  | /                  | /      | /                   | /     | /                     | /     | 2.932(1.689-5.089) | <0.001 |
| LTBR                  | lymphotoxin beta receptor [KO:K03159]                                                     | 0.557(0.308-1.007)    | 0.053  | /                  | /      | 0.312(0.038-2.538)  | 0.276 | 0.135(0.022-0.823)    | 0.03  | 1.506(0.911-2.49)  | 0.11   |
| MAP2K1                | mitogen-activated protein kinase kinase 1 [KO:K04368] [EC:2.7.12.2]                       | 0.551(0.299-1.015)    | 0.056  | 1.257(0.722-2.187) | 0.419  | 0.324(0.077-1.36)   | 0.124 | 24.467(2.472-242.195) | 0.006 | 0.317(0.187-0.537) | <0.001 |
| MAP2K2                | mitogen-activated protein kinase kinase 2 [KO:K04369] [EC:2.7.12.2]                       | 1.84(1.114-3.041)     | 0.017  | 1.851(0.907-3.779) | 0.091  | 2.518(0.505-12.565) | 0.26  | /                     | /     | 0.886(0.539-1.457) | 0.634  |
| MAPK1                 | mitogen-activated protein kinase 1 [KO:K04371] [EC:2.7.11.24]                             | 1.736(0.921-3.271)    | 0.088  | 2.91(1.425-5.944)  | 0.003  | 2.226(0.557-8.903)  | 0.258 | /                     | /     | 0.962(0.587-1.577) | 0.877  |
| MAPK3                 | mitogen-activated protein kinase 3 [KO:K04371] [EC:2.7.11.24]                             | 0.656(0.419-1.029)    | 0.066  | 2.59(1.53-4.383)   | <0.001 | 2.437(0.486-12.208) | 0.279 | 0.359(0.074-1.735)    | 0.202 | 0.353(0.128-0.975) | 0.045  |
| MKKN1                 | MAPK interacting serine/threonine kinase 1 [KO:K04372] [EC:2.7.11.1]                      | 0.402(0.23-0.705)     | 0.001  | /                  | /      | 0.151(0.019-1.229)  | 0.077 | /                     | /     | 1.12(0.58-2.162)   | 0.736  |
| MKKN2                 | MAPK interacting serine/threonine kinase 2 [KO:K04372] [EC:2.7.11.1]                      | 1.362(0.739-2.51)     | 0.322  | /                  | /      | 0.198(0.047-0.833)  | 0.027 | /                     | /     | 0.477(0.278-0.818) | 0.007  |
| MTOR                  | mechanistic target of rapamycin kinase [KO:K07203] [EC:2.7.11.1]                          | 0.542(0.344-0.852)    | 0.008  | 1.231(0.681-2.225) | 0.491  | 0.116(0.029-0.472)  | 0.003 | /                     | /     | 1.799(1.016-3.186) | 0.044  |
| NFKB1                 | nuclear factor kappa B subunit 1 [KO:K02580]                                              | 0.306(0.112-0.837)    | 0.021  | 0.687(0.407-1.161) | 0.161  | 2.434(0.49-12.082)  | 0.277 | 0.116(0.014-0.992)    | 0.049 | 0.619(0.377-1.018) | 0.059  |
| NOS2                  | nitric oxide synthase 2 [KO:K13241] [EC:1.14.13.39]                                       | 1.574(1.005-2.467)    | 0.048  | /                  | /      | 0.186(0.044-0.781)  | 0.022 | /                     | /     | 1.482(0.669-3.283) | 0.332  |
| NOS3                  | nitric oxide synthase 3 [KO:K13242] [EC:1.14.13.39]                                       | 0.542(0.328-0.895)    | 0.017  | 1.34(0.792-2.268)  | 0.275  | 0.234(0.047-1.16)   | 0.075 | /                     | /     | 1.685(1.016-2.794) | 0.043  |
| NPPA                  | natriuretic peptide A [KO:K12334]                                                         | 0.454(0.264-0.784)    | 0.005  | /                  | /      | 0.191(0.046-0.805)  | 0.024 | /                     | /     | 0.482(0.284-0.819) | 0.007  |
| PDHA1                 | pyruvate dehydrogenase E1 alpha 1 subunit [KO:K00161] [EC:1.2.4.1]                        | 0.599(0.392-0.918)    | 0.018  | 1.933(0.914-4.089) | 0.085  | 0.218(0.052-0.914)  | 0.037 | /                     | /     | 1.508(0.894-2.542) | 0.123  |
| PDHA2                 | pyruvate dehydrogenase E1 alpha 2 subunit [KO:K00161] [EC:1.2.4.1]                        | 1.84(1.113-3.041)     | 0.017  | /                  | /      | /                   | /     | 6.871(0.844-55.912)   | 0.072 | 0.557(0.306-1.014) | 0.056  |
| PDHB                  | pyruvate dehydrogenase E1 beta subunit [KO:K00162] [EC:1.2.4.1]                           | 0.791(0.396-1.579)    | 0.506  | 1.614(0.393-6.624) | 0.506  | 0.301(0.061-1.497)  | 0.143 | 6.029(1.234-29.469)   | 0.026 | 2.607(0.942-7.217) | 0.065  |
| PDK1                  | pyruvate dehydrogenase kinase 1 [KO:K12077] [EC:2.7.11.2]                                 | 1.774(0.889-3.541)    | 0.104  | 0.402(0.202-0.798) | 0.009  | 0.205(0.048-0.865)  | 0.031 | /                     | /     | 0.786(0.374-1.649) | 0.524  |
| PFKFB3                | 6-phosphofructo-2-kinase/fructose-2,6-biphosphatase 3 [KO:K01103] [EC:3.1.3.46 2.7.1.105] | 2.199(1.398-3.46)     | 0.001  | /                  | /      | 0.38(0.09-1.594)    | 0.186 | /                     | /     | 1.09(0.555-2.144)  | 0.802  |
| PFKL                  | phosphofructokinase, liver type [KO:K00850] [EC:2.7.1.11]                                 | 1.573(1.014-2.441)    | 0.043  | 0.716(0.422-1.213) | 0.214  | 0.407(0.097-1.706)  | 0.219 | /                     | /     | 1.928(1.173-3.167) | 0.01   |
| PFKM                  | phosphofructokinase, muscle [KO:K00850] [EC:2.7.1.11]                                     | 1.572(1.026-2.406)    | 0.038  | 2.523(1.48-4.303)  | 0.001  | 0.135(0.027-0.675)  | 0.015 | /                     | /     | 1.641(0.997-2.701) | 0.051  |
| PFKP                  | phosphofructokinase, platelet [KO:K00850] [EC:2.7.1.11]                                   | 1.565(0.929-2.636)    | 0.092  | 2.334(1.357-4.013) | 0.002  | 0.168(0.021-1.365)  | 0.095 | 0.887(0.22-3.583)     | 0.866 | 0.665(0.338-1.312) | 0.239  |
| PGK1                  | phosphoglycerate kinase 1 [KO:K00927] [EC:2.7.2.3]                                        | 1.553(0.923-2.615)    | 0.097  | 2.535(1.308-4.913) | 0.006  | /                   | /     | 2.231(0.553-8.994)    | 0.259 | 2.019(1.154-3.531) | 0.014  |
| PGK2                  | phosphoglycerate kinase 2 [KO:K00927] [EC:2.7.2.3]                                        | 0.729(0.46-1.158)     | 0.181  | /                  | /      | 0.355(0.044-2.896)  | 0.334 | /                     | /     | 2.016(1.216-3.342) | 0.007  |

S2. Prognostic value of Hypoxia-related genes in five HBV-related HCC cohorts (n=596)

| Hypoxia-related genes | Description                                                                                       | Four training cohorts |        |                    |        |                     |       |                       |       | Validation cohort   |        |
|-----------------------|---------------------------------------------------------------------------------------------------|-----------------------|--------|--------------------|--------|---------------------|-------|-----------------------|-------|---------------------|--------|
|                       |                                                                                                   | GSE14520(n=221)       |        | Gao et al(n=159)   |        | ICGC_LIRI_JP(n=53)  |       | GSE10143(n=19)        |       | TCGA_LIHC(n=144)    |        |
|                       |                                                                                                   | HR95%CI               | P      | HR95%CI            | P      | HR95%CI             | P     | HR95%CI               | P     | HR95%CI             | P      |
| PIK3CA                | phosphatidylinositol-4,5-bisphosphate 3-kinase catalytic subunit alpha [KO:K00922] [EC:2.7.1.153] | 1.641(1.072-2.511)    | 0.023  | 0.29(0.091-0.928)  | 0.037  | 0.184(0.023-1.508)  | 0.115 | 0.532(0.126-2.25)     | 0.391 | 1.993(1.116-3.559)  | 0.02   |
| PIK3CB                | phosphatidylinositol-4,5-bisphosphate 3-kinase catalytic subunit beta [KO:K00922] [EC:2.7.1.153]  | 1.596(0.899-2.835)    | 0.111  | 2.963(1.071-8.196) | 0.036  | 4.624(0.569-37.596) | 0.152 | /                     | /     | 2.47(1.414-4.315)   | 0.001  |
| PIK3CD                | phosphatidylinositol-4,5-bisphosphate 3-kinase catalytic subunit delta [KO:K00922] [EC:2.7.1.153] | 0.718(0.466-1.106)    | 0.133  | 1.882(1.01-3.504)  | 0.046  | 0.211(0.052-0.853)  | 0.029 | /                     | /     | 2.185(1.215-3.929)  | 0.009  |
| PIK3R1                | phosphoinositide-3-kinase regulatory subunit 1 [KO:K02649]                                        | 0.376(0.182-0.78)     | 0.009  | 1.327(0.724-2.431) | 0.36   | 2.694(0.543-13.376) | 0.225 | 0.201(0.039-1.042)    | 0.056 | 1.891(0.985-3.628)  | 0.056  |
| PIK3R2                | phosphoinositide-3-kinase regulatory subunit 2 [KO:K02649]                                        | 0.619(0.363-1.055)    | 0.078  | /                  | /      | 0.395(0.094-1.66)   | 0.205 | 0.116(0.019-0.701)    | 0.019 | 1.887(1.017-3.502)  | 0.044  |
| PIK3R3                | phosphoinositide-3-kinase regulatory subunit 3 [KO:K02649]                                        | 0.453(0.29-0.707)     | <0.001 | /                  | /      | /                   | /     | 12.338(1.498-101.594) | 0.019 | 2.602(1.092-6.197)  | 0.031  |
| PLCG1                 | phospholipase C gamma 1 [KO:K01116] [EC:3.1.4.11]                                                 | 2.211(1.338-3.654)    | 0.002  | 2.485(1.251-4.933) | 0.009  | 0.13(0.026-0.645)   | 0.013 | 0.802(0.209-3.071)    | 0.747 | 1.695(1.028-2.796)  | 0.039  |
| PLCG2                 | phospholipase C gamma 2 [KO:K05859] [EC:3.1.4.11]                                                 | 0.297(0.179-0.494)    | <0.001 | 2.065(0.824-5.177) | 0.122  | 0.204(0.049-0.855)  | 0.03  | 5.116(0.627-41.746)   | 0.127 | 0.59(0.351-0.992)   | 0.046  |
| PRKCA                 | protein kinase C alpha [KO:K02677] [EC:2.7.11.13]                                                 | 0.52(0.338-0.799)     | 0.003  | 0.62(0.266-1.447)  | 0.269  | 0.138(0.033-0.581)  | 0.007 | /                     | /     | 0.377(0.231-0.617)  | <0.001 |
| PRKCB                 | protein kinase C beta [KO:K19662] [EC:2.7.11.13]                                                  | 0.376(0.214-0.66)     | 0.001  | 1.453(0.855-2.47)  | 0.168  | 0.186(0.023-1.515)  | 0.116 | /                     | /     | 3.32(1.767-6.24)    | <0.001 |
| PRKCG                 | protein kinase C gamma [KO:K19663] [EC:2.7.11.13]                                                 | 0.584(0.329-1.038)    | 0.067  | /                  | /      | 0.22(0.044-1.092)   | 0.064 | 5.967(1.175-30.314)   | 0.031 | 0.508(0.3-0.861)    | 0.012  |
| RBX1                  | ring-box 1 [KO:K03868] [EC:2.3.2.32]                                                              | 1.899(1.102-3.273)    | 0.021  | /                  | /      | 0.257(0.052-1.273)  | 0.096 | /                     | /     | 1.566(0.926-2.649)  | 0.094  |
| RELA                  | RELA proto-oncogene, NF-kB subunit [KO:K04735]                                                    | 1.528(0.946-2.467)    | 0.083  | 0.803(0.363-1.776) | 0.588  | 0.336(0.08-1.408)   | 0.136 | 0.192(0.02-1.846)     | 0.153 | 1.998(1.163-3.432)  | 0.012  |
| RPS6                  | ribosomal protein S6 [KO:K02991]                                                                  | 1.737(1.043-2.895)    | 0.034  | 2.203(1.183-4.104) | 0.013  | 1.275(0.257-6.325)  | 0.766 | 0.09(0.011-0.725)     | 0.024 | 1.616(0.964-2.707)  | 0.069  |
| RPS6KB1               | ribosomal protein S6 kinase B1 [KO:K04688] [EC:2.7.11.1]                                          | 2.129(1.39-3.259)     | 0.001  | 1.892(1.109-3.23)  | 0.019  | /                   | /     | 2.232(0.566-8.955)    | 0.257 | 2.28(1.376-3.778)   | 0.001  |
| RPS6KB2               | ribosomal protein S6 kinase B2 [KO:K04688] [EC:2.7.11.1]                                          | 1.8(1.055-3.071)      | 0.031  | 1.573(0.793-3.118) | 0.195  | 0.465(0.093-2.319)  | 0.351 | 2.08(0.517-8.376)     | 0.303 | 2.094(1.183-3.708)  | 0.011  |
| SERPINE1              | serpin family E member 1 [KO:K03982]                                                              | 2.482(1.562-3.944)    | <0.001 | /                  | /      | 4.526(1.075-19.046) | 0.039 | 0.297(0.078-1.134)    | 0.076 | 2.107(1.227-3.62)   | 0.007  |
| SLC2A1                | solute carrier family 2 member 1 [KO:K07299]                                                      | 1.873(1.221-2.873)    | 0.004  | 3.181(1.732-5.845) | <0.001 | 0.267(0.066-1.077)  | 0.063 | /                     | /     | 2.355(1.256-4.416)  | 0.008  |
| STAT3                 | signal transducer and activator of transcription 3 [KO:K04692]                                    | 0.476(0.285-0.795)    | 0.005  | 0.725(0.355-1.48)  | 0.377  | 0.41(0.098-1.721)   | 0.223 | 0.137(0.016-1.19)     | 0.071 | 4.529(1.359-15.097) | 0.014  |
| TEK                   | TEK receptor tyrosine kinase [KO:K05121] [EC:2.7.10.1]                                            | 0.454(0.283-0.729)    | 0.001  | /                  | /      | 0.485(0.098-2.405)  | 0.376 | 1.785(0.445-7.168)    | 0.414 | 1.374(0.83-2.274)   | 0.217  |
| TF                    | transferrin [KO:K14736]                                                                           | 0.304(0.111-0.829)    | 0.02   | 2.248(1.161-4.352) | 0.016  | 2.13(0.429-10.575)  | 0.355 | 10.238(1.225-85.559)  | 0.032 | 2.957(1.778-4.92)   | <0.001 |
| TFRC                  | transferrin receptor [KO:K06503]                                                                  | 1.399(0.908-2.156)    | 0.128  | 2.438(1.345-4.42)  | 0.003  | 0.216(0.052-0.904)  | 0.036 | /                     | /     | 1.796(1.08-2.987)   | 0.024  |
| TIMP1                 | TIMP metalloproteinase inhibitor 1 [KO:K16451]                                                    | 1.23(0.803-1.883)     | 0.341  | 2.605(1.346-5.04)  | 0.004  | 0.47(0.112-1.969)   | 0.301 | 0.3(0.075-1.205)      | 0.09  | 5.346(1.304-21.911) | 0.02   |
| TLR4                  | toll like receptor 4 [KO:K10160]                                                                  | 0.617(0.403-0.945)    | 0.026  | /                  | /      | 2.425(0.577-10.189) | 0.226 | /                     | /     | 2.117(1.239-3.617)  | 0.006  |
| VEGFA                 | vascular endothelial growth factor A [KO:K05448]                                                  | /                     | 0.996  | /                  | /      | 0.17(0.041-0.714)   | 0.015 | 0.411(0.084-2.019)    | 0.273 | 1.342(0.751-2.399)  | 0.32   |
| VHL                   | von Hippel-Lindau tumor suppressor [KO:K03871]                                                    | 1.754(0.988-3.117)    | 0.055  | /                  | /      | 0.242(0.058-1.016)  | 0.053 | /                     | /     | 2.05(1.044-4.027)   | 0.037  |

S3. Prognostic value of 64 TME cells in five HBV-related HCC cohorts (n=596)

| TME cells                     | Subgroup   | Full Names                          | Four training cohorts |        |                    |       |                     |       |                      |       | Validation cohort  |        |
|-------------------------------|------------|-------------------------------------|-----------------------|--------|--------------------|-------|---------------------|-------|----------------------|-------|--------------------|--------|
|                               |            |                                     | GSE14520(n=221)       |        | Gao et al(n=159)   |       | ICGC_LIRI_JP (n=53) |       | GSE10143(n=19)       |       | TCGA_LIHC(n=144)   |        |
|                               |            |                                     | HR95%CI               | P      | HR95%CI            | P     | HR95%CI             | P     | HR95%CI              | P     | HR95%CI            | P      |
| aDC                           | Myeloid    | Activated dendritic cells           | 0.51(0.207-1.259)     | 0.144  | 1.095(0.643-1.866) | 0.738 | 0.172(0.035-0.852)  | 0.031 | 0.312(0.06-1.626)    | 0.167 | /                  | /      |
| Adipocytes                    | Stroma     | Adipocytes                          | 0.552(0.331-0.919)    | 0.022  | 0.376(0.091-1.547) | 0.175 | /                   | /     | 1.151(0.308-4.306)   | 0.834 | 0.438(0.252-0.761) | 0.003  |
| Astrocytes                    | Epithelial | Astrocytes                          | 1.506(0.978-2.321)    | 0.063  | 1.169(0.617-2.215) | 0.632 | 0.355(0.043-2.899)  | 0.334 | 0.227(0.045-1.141)   | 0.072 | 1.274(0.774-2.095) | 0.341  |
| Basophils                     | Myeloid    | Basophils                           | 1.532(0.943-2.49)     | 0.085  | 1.388(0.798-2.414) | 0.246 | /                   | /     | 13.017(1.806-93.817) | 0.011 | 0.635(0.088-4.605) | 0.654  |
| B-cells                       | Lymphoid   | B-cells                             | 0.387(0.249-0.603)    | <0.001 | 1.464(0.717-2.989) | 0.295 | 0.354(0.072-1.756)  | 0.204 | /                    | /     | 0.487(0.293-0.809) | 0.006  |
| CD4+ memory T-cells           | Lymphoid   | CD4+ memory T-cells                 | 0.877(0.573-1.343)    | 0.546  | 2.734(0.854-8.75)  | 0.09  | /                   | /     | /                    | /     | 1.436(0.879-2.348) | 0.149  |
| CD4+ naive T-cells            | Lymphoid   | CD4+ naive T-cells                  | 0.56(0.359-0.876)     | 0.011  | 1.864(0.881-3.941) | 0.103 | 0.564(0.135-2.36)   | 0.433 | /                    | /     | 0.582(0.352-0.961) | 0.034  |
| CD4+ T-cells                  | Lymphoid   | CD4+ T-cells                        | 0.382(0.053-2.748)    | 0.339  | 2.068(0.936-4.567) | 0.072 | 0.262(0.032-2.135)  | 0.211 | /                    | /     | 0.691(0.39-1.225)  | 0.205  |
| CD4+ Tcm                      | Lymphoid   | CD4+ central memory T-cells         | 0.647(0.419-1)        | 0.05   | 1.185(0.429-3.279) | 0.743 | /                   | /     | /                    | /     | 0.551(0.297-1.023) | 0.059  |
| CD4+ Tem                      | Lymphoid   | CD4+ effector memory T-cells        | 0.748(0.471-1.188)    | 0.218  | 0.765(0.186-3.143) | 0.71  | /                   | /     | /                    | /     | 0.697(0.391-1.243) | 0.222  |
| CD8+ naive T-cells            | Lymphoid   | CD8+ naive T-cells                  | 1.363(0.867-2.143)    | 0.18   | 2.227(1.121-4.424) | 0.022 | /                   | /     | 0.276(0.067-1.132)   | 0.074 | 0.595(0.309-1.147) | 0.121  |
| CD8+ T-cells                  | Lymphoid   | CD8+ T-cells                        | 0.58(0.362-0.932)     | 0.024  | 2.334(1.142-4.77)  | 0.02  | /                   | /     | /                    | /     | 0.467(0.283-0.772) | 0.003  |
| CD8+ Tcm                      | Lymphoid   | CD8+ central memory T-cells         | 0.583(0.353-0.964)    | 0.035  | 0.483(0.243-0.96)  | 0.038 | 0.082(0.01-0.667)   | 0.019 | /                    | /     | 0.52(0.257-1.052)  | 0.069  |
| CD8+ Tem                      | Lymphoid   | CD8+ effector memory T-cells        | 0.446(0.291-0.684)    | <0.001 | 0.265(0.083-0.851) | 0.026 | 0.384(0.077-1.917)  | 0.243 | 0.302(0.062-1.471)   | 0.138 | 0.57(0.257-1.263)  | 0.166  |
| cDC                           | Myeloid    | Conventional dendritic cells        | 0.259(0.112-0.597)    | 0.002  | 2.646(1.464-4.781) | 0.001 | /                   | /     | /                    | /     | 0.984(0.561-1.729) | 0.957  |
| Chondrocytes                  | Stroma     | Chondrocytes                        | 0.73(0.474-1.123)     | 0.152  | 0.568(0.328-0.983) | 0.043 | /                   | /     | /                    | /     | 0.683(0.388-1.201) | 0.186  |
| Class-switched memory B-cells | Lymphoid   | Class-switched memory B-cells       | 0.661(0.412-1.06)     | 0.085  | 0.888(0.514-1.535) | 0.671 | 0.449(0.091-2.229)  | 0.327 | /                    | /     | 1.017(0.14-7.393)  | 0.986  |
| CLP                           | HSC        | Common lymphoid progenitors         | 1.809(1.159-2.825)    | 0.009  | 0.714(0.395-1.29)  | 0.264 | 0.181(0.022-1.475)  | 0.11  | /                    | /     | 3.595(1.441-8.972) | 0.006  |
| CMP                           | HSC        | Common myeloid progenitors          | 0.376(0.204-0.692)    | 0.002  | 1.72(0.907-3.261)  | 0.097 | /                   | /     | 3.173(0.783-12.862)  | 0.106 | 0.815(0.487-1.365) | 0.437  |
| DC                            | Myeloid    | Dendritic cells                     | 0.737(0.416-1.308)    | 0.297  | 1.455(0.856-2.475) | 0.166 | /                   | /     | /                    | /     | 0.505(0.07-3.649)  | 0.498  |
| Endothelial cells             | Stroma     | Endothelial cells                   | 0.629(0.36-1.099)     | 0.104  | /                  | /     | 2.519(0.601-10.557) | 0.206 | /                    | /     | /                  | /      |
| Eosinophils                   | Myeloid    | Eosinophils                         | 0.487(0.303-0.781)    | 0.003  | 0.595(0.352-1.006) | 0.053 | 2.669(0.667-10.677) | 0.165 | /                    | /     | 2.35(1.402-3.94)   | 0.001  |
| Epithelial cells              | Epithelial | Epithelial cells                    | 1.21(0.682-2.148)     | 0.514  | 1.758(1.038-2.978) | 0.036 | 0.407(0.05-3.313)   | 0.401 | 0.377(0.094-1.518)   | 0.17  | 0.765(0.461-1.269) | 0.299  |
| Erythrocytes                  | HSC        | Erythrocytes                        | 1.738(0.898-3.362)    | 0.101  | 1.494(0.364-6.135) | 0.577 | 2.806(0.562-14.016) | 0.209 | 0.123(0.011-1.358)   | 0.087 | 2.029(1.219-3.376) | 0.006  |
| Fibroblasts                   | Stroma     | Fibroblasts                         | 0.743(0.484-1.138)    | 0.172  | 0.698(0.278-1.75)  | 0.443 | 1.859(0.229-15.126) | 0.562 | 0.177(0.039-0.802)   | 0.025 | 2.402(1.46-3.952)  | 0.001  |
| GMP                           | HSC        | Granulocyte-macrophage progenitors  | 0.714(0.442-1.153)    | 0.168  | 1.316(0.779-2.224) | 0.305 | /                   | /     | /                    | /     | 0.391(0.232-0.657) | <0.001 |
| Hepatocytes                   | Epithelial | Hepatocytes                         | 0.435(0.261-0.724)    | 0.001  | 0.432(0.236-0.793) | 0.007 | /                   | /     | 2.988(0.791-11.282)  | 0.106 | 0.567(0.227-1.413) | 0.223  |
| HSC                           | HSC        | Hematopoietic stem cells            | 0.698(0.426-1.143)    | 0.153  | 0.598(0.35-1.021)  | 0.059 | 2.673(0.668-10.703) | 0.165 | 1.911(0.512-7.135)   | 0.335 | 1.677(0.875-3.213) | 0.119  |
| iDC                           | Myeloid    | Immature dendritic cells            | 0.488(0.283-0.842)    | 0.01   | 1.756(0.752-4.1)   | 0.193 | 2.403(0.573-10.081) | 0.231 | 2.101(0.262-16.825)  | 0.484 | 2.428(1.458-4.046) | 0.001  |
| Keratinocytes                 | Epithelial | Keratinocytes                       | 1.09(0.624-1.905)     | 0.761  | 1.506(0.89-2.547)  | 0.127 | /                   | /     | 0.322(0.04-2.599)    | 0.288 | 2.18(1.091-4.354)  | 0.027  |
| Ly Endothelial cells          | Stroma     | Lymphatic endothelial cells         | /                     | /      | 0.817(0.199-3.357) | 0.779 | 0.179(0.045-0.719)  | 0.015 | /                    | /     | 0.455(0.25-0.829)  | 0.01   |
| Macrophages                   | Myeloid    | Macrophages                         | 0.667(0.435-1.022)    | 0.063  | 0.831(0.492-1.402) | 0.487 | 0.279(0.056-1.383)  | 0.118 | 0.371(0.098-1.399)   | 0.143 | 1.714(1.019-2.883) | 0.042  |
| Macrophages M1                | Myeloid    | Macrophages M1                      | 0.679(0.404-1.143)    | 0.145  | 0.897(0.508-1.586) | 0.709 | 4.092(0.816-20.51)  | 0.087 | 0.37(0.077-1.788)    | 0.216 | 1.55(0.806-2.978)  | 0.189  |
| Macrophages M2                | Myeloid    | Macrophages M2                      | 0.564(0.283-1.127)    | 0.105  | 0.725(0.355-1.48)  | 0.377 | /                   | /     | 3.023(0.352-25.952)  | 0.313 | 3.328(1.968-5.626) | <0.001 |
| Mast cells                    | Myeloid    | Mast cells                          | 1.277(0.819-1.993)    | 0.281  | 2.726(1.408-5.28)  | 0.003 | 4.92(1.175-20.602)  | 0.029 | 4.979(0.959-25.841)  | 0.056 | 1.55(0.677-3.551)  | 0.3    |
| Megakaryocytes                | HSC        | Megakaryocytes                      | 0.78(0.508-1.196)     | 0.254  | 1.486(0.879-2.511) | 0.139 | 2.445(0.301-19.88)  | 0.403 | 6.213(0.767-50.342)  | 0.087 | 2.532(1.545-4.149) | <0.001 |
| Melanocytes                   | Epithelial | Melanocytes                         | 0.728(0.471-1.127)    | 0.155  | 0.85(0.207-3.489)  | 0.822 | 3.214(0.803-12.871) | 0.099 | /                    | /     | 2.669(1.191-5.977) | 0.017  |
| Memory B-cells                | Lymphoid   | Memory B-cells                      | 0.551(0.358-0.846)    | 0.007  | 0.541(0.32-0.915)  | 0.022 | /                   | /     | /                    | /     | 2.932(1.555-5.53)  | 0.001  |
| MEP                           | HSC        | Megakaryocyte-erythroid progenitors | 2.143(0.866-5.302)    | 0.099  | 1.825(1.009-3.301) | 0.047 | 5.572(0.612-50.764) | 0.128 | /                    | /     | 0.531(0.291-0.968) | 0.039  |
| Mesangial cells               | Stroma     | Mesangial cells                     | 1.799(1.099-2.946)    | 0.02   | 2.483(0.898-6.867) | 0.08  | 0.627(0.157-2.507)  | 0.509 | /                    | /     | 0.3(0.041-2.191)   | 0.235  |
| Monocytes                     | Myeloid    | Monocytes                           | 0.621(0.398-0.97)     | 0.036  | 1.815(0.822-4.008) | 0.14  | /                   | /     | 0.155(0.019-1.253)   | 0.08  | 1.617(0.994-2.633) | 0.053  |
| MPP                           | HSC        | Multipotent rogenitors              | 0.536(0.347-0.829)    | 0.005  | 1.419(0.643-3.134) | 0.386 | 1.169(0.292-4.688)  | 0.825 | /                    | /     | 0.897(0.53-1.517)  | 0.684  |
| MSC                           | Stroma     | Mesenchymal stem cells              | 0.71(0.457-1.101)     | 0.126  | 1.265(0.739-2.166) | 0.392 | /                   | /     | 0.316(0.077-1.296)   | 0.11  | 2.512(1.474-4.282) | 0.001  |
| mv Endothelial cells          | Stroma     | Microvascular endothelial cells     | 0.809(0.498-1.315)    | 0.393  | 0.537(0.308-0.934) | 0.028 | 1.641(0.392-6.871)  | 0.497 | /                    | /     | 0.658(0.369-1.174) | 0.156  |

S3. Prognostic value of 64 TME cells in five HBV-related HCC cohorts (n=596)

| TME cells             | Subgroup   | Full Names                   | Four training cohorts |       |                    |        |                     |       |                     |       | Validation cohort  |        |
|-----------------------|------------|------------------------------|-----------------------|-------|--------------------|--------|---------------------|-------|---------------------|-------|--------------------|--------|
|                       |            |                              | GSE14520(n=221)       |       | Gao et al(n=159)   |        | ICGC_LIRI_JP (n=53) |       | GSE10143(n=19)      |       | TCGA_LIHC(n=144)   |        |
|                       |            |                              | HR95%CI               | P     | HR95%CI            | P      | HR95%CI             | P     | HR95%CI             | P     | HR95%CI            | P      |
| Myocytes              | Stroma     | Myocytes                     | 0.763(0.497-1.172)    | 0.217 | 2.054(1.179-3.58)  | 0.011  | 2.626(0.323-21.35)  | 0.367 | 0.647(0.159-2.625)  | 0.542 | 0.626(0.226-1.732) | 0.367  |
| naive B-cells         | Lymphoid   | naive B-cells                | 0.511(0.311-0.838)    | 0.008 | 2.085(0.754-5.767) | 0.157  | /                   | /     | /                   | /     | 1.629(0.995-2.669) | 0.053  |
| Neurons               | Epithelial | Neurons                      | 1.493(0.854-2.608)    | 0.159 | 0.563(0.255-1.244) | 0.156  | 0.598(0.073-4.868)  | 0.63  | 2.661(0.543-13.025) | 0.227 | 1.518(0.899-2.562) | 0.119  |
| Neutrophils           | Myeloid    | Neutrophils                  | 1.283(0.47-3.502)     | 0.627 | 1.491(0.875-2.539) | 0.142  | 0.516(0.123-2.163)  | 0.365 | 2.587(0.528-12.672) | 0.241 | 0.529(0.166-1.692) | 0.283  |
| NK cells              | Lymphoid   | NK cells                     | 0.552(0.349-0.872)    | 0.011 | 0.805(0.455-1.425) | 0.457  | 0.244(0.03-1.988)   | 0.187 | /                   | /     | 1.799(0.773-4.186) | 0.173  |
| NKT                   | Lymphoid   | Natural killer T-cells       | 0.681(0.445-1.042)    | 0.077 | 5.023(0.695-36.31) | 0.11   | 2.297(0.282-18.691) | 0.437 | /                   | /     | 0.558(0.339-0.918) | 0.022  |
| Osteoblast            | Stroma     | Osteoblasts                  | 2.27(0.717-7.187)     | 0.163 | 0.662(0.385-1.137) | 0.135  | 6.712(0.823-54.751) | 0.075 | 0.123(0.011-1.358)  | 0.087 | 0.631(0.312-1.277) | 0.201  |
| pDC                   | Myeloid    | Plasmacytoid dendritic cells | 0.797(0.519-1.224)    | 0.3   | 0.45(0.213-0.952)  | 0.037  | 0.63(0.127-3.125)   | 0.572 | /                   | /     | 0.559(0.308-1.013) | 0.055  |
| Pericytes             | Stroma     | Pericytes                    | 1.727(0.973-3.064)    | 0.062 | 0.561(0.31-1.014)  | 0.055  | 2.507(0.599-10.503) | 0.208 | 2.824(0.681-11.719) | 0.153 | 1.966(1.083-3.569) | 0.026  |
| Plasma cells          | Lymphoid   | Plasma cells                 | 0.503(0.32-0.792)     | 0.003 | 0.824(0.482-1.41)  | 0.48   | 0.107(0.013-0.869)  | 0.037 | /                   | /     | 1.377(0.831-2.282) | 0.214  |
| Platelets             | HSC        | Platelets                    | 0.605(0.395-0.926)    | 0.021 | 1.334(0.767-2.321) | 0.307  | 4.082(1.02-16.34)   | 0.047 | 5.329(1.182-24.02)  | 0.029 | 0.441(0.27-0.718)  | 0.001  |
| Preadipocytes         | Stroma     | Preadipocytes                | 0.462(0.245-0.87)     | 0.017 | 0.239(0.139-0.412) | <0.001 | 1.572(0.317-7.804)  | 0.58  | /                   | /     | 0.588(0.353-0.978) | 0.041  |
| pro B-cells           | Lymphoid   | pro B-cells                  | 1.395(0.773-2.518)    | 0.27  | 1.816(1.025-3.217) | 0.041  | 0.481(0.12-1.926)   | 0.301 | /                   | /     | 0.762(0.456-1.275) | 0.301  |
| Sebocytes             | Epithelial | Sebocytes                    | 1.828(1.074-3.112)    | 0.026 | 1.358(0.78-2.362)  | 0.279  | 0.681(0.163-2.857)  | 0.6   | 0.646(0.081-5.187)  | 0.681 | 4.813(1.51-15.343) | 0.008  |
| Skeletal muscle cells | Stroma     | Skeletal muscle cells        | 2.2(1.102-4.391)      | 0.025 | 0.478(0.233-0.977) | 0.043  | /                   | /     | 0.385(0.076-1.946)  | 0.248 | 1.802(1.087-2.986) | 0.022  |
| Smooth muscle cells   | Stroma     | Smooth muscle cells          | 1.391(0.51-3.797)     | 0.52  | 1.699(0.951-3.036) | 0.073  | 0.467(0.117-1.869)  | 0.282 | /                   | /     | 1.442(0.351-5.921) | 0.612  |
| Tgd cells             | Lymphoid   | Gamma delta T-cells          | 1.619(0.972-2.698)    | 0.064 | 2.235(1.274-3.92)  | 0.005  | 3.394(0.809-14.24)  | 0.095 | 0.248(0.057-1.088)  | 0.065 | 0.514(0.267-0.989) | 0.046  |
| Th1 cells             | Lymphoid   | Type 1 T-helper cells        | 1.783(1.164-2.731)    | 0.008 | 1.245(0.721-2.151) | 0.432  | 6.18(0.757-50.423)  | 0.089 | 3.406(0.898-12.918) | 0.072 | 0.403(0.242-0.67)  | <0.001 |
| Th2 cells             | Lymphoid   | Type 2 T-helper cells        | 1.705(1.056-2.753)    | 0.029 | 2.008(1.173-3.438) | 0.011  | 2.34(0.288-19.033)  | 0.426 | /                   | /     | 1.694(0.767-3.742) | 0.193  |
| Tregs                 | Lymphoid   | Regulatory T-cells           | 0.819(0.531-1.261)    | 0.364 | 1.856(0.96-3.589)  | 0.066  | 0.039(0.004-0.433)  | 0.008 | /                   | /     | 1.636(0.968-2.768) | 0.066  |

**S4. Pooled prognostic value of Hypoxia-related genes based on pooled four training cohorts (meta-analysis,n=452)**

| Hypoxia-related genes | Pooled results(n=452) |       |        |        |        |        | Included in Hypoxia Score Model |
|-----------------------|-----------------------|-------|--------|--------|--------|--------|---------------------------------|
|                       | Freq of cohorts       | HR    | 95CI_L | 95CI_U | pvalue | FDR    |                                 |
| EPO                   | 3                     | 3.317 | 2.097  | 5.246  | <0.001 | <0.001 | YES                             |
| HK2                   | 4                     | 2.424 | 1.702  | 3.452  | <0.001 | <0.001 | YES                             |
| ENO2                  | 4                     | 2.413 | 1.715  | 3.394  | <0.001 | <0.001 | YES                             |
| ALDOA                 | 4                     | 2.367 | 1.502  | 3.729  | <0.001 | 0.003  | YES                             |
| HMOX1                 | 4                     | 2.321 | 1.506  | 3.577  | <0.001 | 0.002  | YES                             |
| LDHA                  | 4                     | 2.311 | 1.616  | 3.307  | <0.001 | <0.001 | YES                             |
| ENO3                  | 4                     | 2.196 | 1.566  | 3.079  | <0.001 | <0.001 | YES                             |
| MAPK1                 | 4                     | 2.184 | 1.394  | 3.42   | 0.001  | 0.005  | YES                             |
| SERPINE1              | 3                     | 2.123 | 1.397  | 3.227  | <0.001 | 0.004  | YES                             |
| EGLN3                 | 2                     | 2.058 | 1.36   | 3.114  | 0.001  | 0.005  | YES                             |
| RPS6KB1               | 4                     | 2.045 | 1.479  | 2.827  | <0.001 | <0.001 | YES                             |
| EGF                   | 3                     | 2.044 | 1.318  | 3.169  | 0.001  | 0.008  | YES                             |
| PDHA2                 | 3                     | 1.977 | 1.213  | 3.223  | 0.006  | 0.023  | YES                             |
| SLC2A1                | 4                     | 1.968 | 1.402  | 2.764  | <0.001 | 0.002  | YES                             |
| PIK3CB                | 3                     | 1.948 | 1.197  | 3.168  | 0.007  | 0.024  | YES                             |
| ANGPT1                | 3                     | 1.918 | 1.194  | 3.082  | 0.007  | 0.024  | YES                             |
| PGK1                  | 4                     | 1.899 | 1.282  | 2.812  | 0.001  | 0.008  | YES                             |
| MAP2K2                | 3                     | 1.88  | 1.263  | 2.798  | 0.002  | 0.01   | YES                             |
| PFKFB3                | 3                     | 1.875 | 1.217  | 2.889  | 0.004  | 0.017  | YES                             |
| EIF4E2                | 3                     | 1.854 | 1.327  | 2.591  | <0.001 | 0.004  | YES                             |
| EGLN1                 | 3                     | 1.823 | 1.234  | 2.691  | 0.003  | 0.011  | YES                             |
| PLCG1                 | 4                     | 1.808 | 1.24   | 2.636  | 0.002  | 0.01   | YES                             |
| PFKM                  | 4                     | 1.696 | 1.224  | 2.349  | 0.002  | 0.008  | YES                             |
| RPS6                  | 4                     | 1.692 | 1.161  | 2.467  | 0.006  | 0.023  | YES                             |
| PFKP                  | 4                     | 1.681 | 1.176  | 2.403  | 0.004  | 0.017  | YES                             |
| LDHB                  | 4                     | 1.651 | 1.108  | 2.46   | 0.014  | 0.041  | YES                             |
| EP300                 | 4                     | 1.642 | 1.173  | 2.299  | 0.004  | 0.016  | YES                             |
| HKDC1                 | 3                     | 1.642 | 1.101  | 2.449  | 0.015  | 0.042  | YES                             |
| RPS6KB2               | 4                     | 1.608 | 1.088  | 2.378  | 0.017  | 0.045  | YES                             |
| EIF4EBP1              | 3                     | 1.543 | 1.088  | 2.189  | 0.015  | 0.042  | YES                             |
| TFRC                  | 4                     | 1.509 | 1.075  | 2.12   | 0.018  | 0.045  | YES                             |
| MTOR                  | 3                     | 0.654 | 0.462  | 0.927  | 0.017  | 0.045  | YES                             |
| CREBBP                | 4                     | 0.563 | 0.394  | 0.805  | 0.002  | 0.009  | YES                             |
| IGF1                  | 3                     | 0.55  | 0.367  | 0.824  | 0.004  | 0.016  | YES                             |
| IFNG                  | 2                     | 0.538 | 0.321  | 0.901  | 0.018  | 0.046  | YES                             |
| PIK3R2                | 3                     | 0.522 | 0.322  | 0.845  | 0.008  | 0.027  | YES                             |
| PIK3R3                | 3                     | 0.522 | 0.337  | 0.807  | 0.003  | 0.015  | YES                             |
| TEK                   | 3                     | 0.521 | 0.338  | 0.802  | 0.003  | 0.013  | YES                             |
| STAT3                 | 4                     | 0.513 | 0.347  | 0.761  | 0.001  | 0.006  | YES                             |
| IL6R                  | 3                     | 0.509 | 0.295  | 0.878  | 0.015  | 0.042  | YES                             |
| ANGPT4                | 2                     | 0.498 | 0.289  | 0.858  | 0.012  | 0.037  | YES                             |
| PRKCA                 | 4                     | 0.492 | 0.34   | 0.712  | <0.001 | 0.003  | YES                             |
| PLCG2                 | 4                     | 0.48  | 0.316  | 0.727  | 0.001  | 0.005  | YES                             |
| LTBR                  | 3                     | 0.471 | 0.274  | 0.812  | 0.007  | 0.023  | YES                             |
| CAMK2B                | 3                     | 0.451 | 0.289  | 0.705  | <0.001 | 0.004  | YES                             |
| NPPA                  | 3                     | 0.408 | 0.245  | 0.678  | 0.001  | 0.005  | YES                             |
| MKMK1                 | 3                     | 0.377 | 0.22   | 0.648  | <0.001 | 0.004  | YES                             |
| VEGFA                 | 3                     | 0.252 | 0.087  | 0.733  | 0.011  | 0.036  | YES                             |
| AKT1                  | 4                     | 0.789 | 0.567  | 1.098  | 0.16   | 0.247  | NO                              |
| AKT2                  | 4                     | 0.892 | 0.61   | 1.304  | 0.555  | 0.638  | NO                              |
| AKT3                  | 3                     | 1.353 | 0.86   | 2.129  | 0.191  | 0.278  | NO                              |
| ALDOB                 | 4                     | 0.882 | 0.632  | 1.231  | 0.46   | 0.554  | NO                              |
| ALDOC                 | 4                     | 1.056 | 0.724  | 1.542  | 0.776  | 0.81   | NO                              |
| ANGPT2                | 3                     | 2.57  | 1.16   | 5.691  | 0.02   | 0.05   | NO                              |
| ARNT                  | 4                     | 1.489 | 0.977  | 2.271  | 0.064  | 0.126  | NO                              |
| BCL2                  | 3                     | 0.574 | 0.335  | 0.981  | 0.042  | 0.096  | NO                              |
| CAMK2A                | 3                     | 0.715 | 0.48   | 1.066  | 0.1    | 0.173  | NO                              |
| CAMK2D                | 2                     | 0.501 | 0.266  | 0.943  | 0.032  | 0.076  | NO                              |
| CAMK2G                | 4                     | 1.074 | 0.728  | 1.583  | 0.72   | 0.766  | NO                              |
| CDKN1A                | 3                     | 1.432 | 0.945  | 2.17   | 0.091  | 0.165  | NO                              |
| CDKN1B                | 4                     | 0.835 | 0.579  | 1.205  | 0.336  | 0.43   | NO                              |
| CUL2                  | 4                     | 0.959 | 0.693  | 1.327  | 0.801  | 0.83   | NO                              |
| CYBB                  | 4                     | 1.087 | 0.764  | 1.546  | 0.643  | 0.705  | NO                              |
| EDN1                  | 2                     | 1.613 | 0.968  | 2.688  | 0.067  | 0.128  | NO                              |
| EGFR                  | 4                     | 0.879 | 0.436  | 1.77   | 0.717  | 0.766  | NO                              |
| EIF4E                 | 4                     | 1.097 | 0.768  | 1.566  | 0.612  | 0.685  | NO                              |
| ELOB                  | 2                     | 0.82  | 0.579  | 1.161  | 0.264  | 0.359  | NO                              |
| ELOC                  | 2                     | 1.499 | 1.034  | 2.172  | 0.033  | 0.076  | NO                              |



**S4. Pooled prognostic value of Hypoxia-related genes based on pooled four training cohorts (meta-analysis,n=452)**

| Hypoxia-related genes | Pooled results(n=452) |       |        |        |        |       | Included in Hypoxia Score Model |
|-----------------------|-----------------------|-------|--------|--------|--------|-------|---------------------------------|
|                       | Freq of cohorts       | HR    | 95CI_L | 95CI_U | pvalue | FDR   |                                 |
| ENO1                  | 4                     | 1.558 | 0.975  | 2.49   | 0.064  | 0.126 | NO                              |
| ERBB2                 | 4                     | 0.855 | 0.594  | 1.23   | 0.398  | 0.498 | NO                              |
| FLT1                  | 3                     | 1.456 | 0.959  | 2.21   | 0.078  | 0.144 | NO                              |
| GAPDH                 | 4                     | 1.466 | 1.043  | 2.061  | 0.028  | 0.067 | NO                              |
| HIF1A                 | 3                     | 1.116 | 0.69   | 1.806  | 0.654  | 0.708 | NO                              |
| HK1                   | 4                     | 0.796 | 0.558  | 1.138  | 0.211  | 0.302 | NO                              |
| HK3                   | 4                     | 0.904 | 0.594  | 1.375  | 0.636  | 0.703 | NO                              |
| IFNGR1                | 3                     | 0.812 | 0.542  | 1.217  | 0.312  | 0.408 | NO                              |
| IFNGR2                | 3                     | 1.287 | 0.786  | 2.106  | 0.316  | 0.408 | NO                              |
| IGF1R                 | 3                     | 0.599 | 0.354  | 1.014  | 0.057  | 0.118 | NO                              |
| IL6                   | 3                     | 0.631 | 0.418  | 0.953  | 0.029  | 0.068 | NO                              |
| INS                   | 3                     | 1.57  | 0.87   | 2.834  | 0.135  | 0.215 | NO                              |
| INSR                  | 4                     | 1.644 | 1.005  | 2.691  | 0.048  | 0.105 | NO                              |
| LDHAL6B               | 2                     | 1.194 | 0.745  | 1.914  | 0.462  | 0.554 | NO                              |
| LDHC                  | 3                     | 0.646 | 0.407  | 1.025  | 0.064  | 0.126 | NO                              |
| MAP2K1                | 4                     | 0.887 | 0.601  | 1.308  | 0.544  | 0.634 | NO                              |
| MAPK3                 | 4                     | 1.147 | 0.827  | 1.591  | 0.411  | 0.503 | NO                              |
| MKNK2                 | 2                     | 1.014 | 0.578  | 1.779  | 0.962  | 0.974 | NO                              |
| NFKB1                 | 4                     | 0.602 | 0.389  | 0.932  | 0.023  | 0.056 | NO                              |
| NOS2                  | 2                     | 1.302 | 0.848  | 1.999  | 0.228  | 0.321 | NO                              |
| NOS3                  | 4                     | 0.784 | 0.55   | 1.117  | 0.178  | 0.262 | NO                              |
| PDHA1                 | 3                     | 0.736 | 0.514  | 1.053  | 0.093  | 0.167 | NO                              |
| PDHB                  | 4                     | 0.999 | 0.58   | 1.72   | 0.996  | 0.996 | NO                              |
| PDK1                  | 4                     | 0.727 | 0.458  | 1.153  | 0.175  | 0.262 | NO                              |
| PFKL                  | 4                     | 1.079 | 0.777  | 1.499  | 0.65   | 0.708 | NO                              |
| PGK2                  | 2                     | 0.706 | 0.45   | 1.108  | 0.13   | 0.213 | NO                              |
| PIK3CA                | 4                     | 1.176 | 0.805  | 1.718  | 0.401  | 0.498 | NO                              |
| PIK3CD                | 4                     | 0.895 | 0.634  | 1.263  | 0.527  | 0.619 | NO                              |
| PIK3R1                | 4                     | 0.789 | 0.512  | 1.214  | 0.281  | 0.377 | NO                              |
| PRKCB                 | 3                     | 0.734 | 0.502  | 1.073  | 0.11   | 0.188 | NO                              |
| PRKCG                 | 3                     | 0.666 | 0.399  | 1.113  | 0.121  | 0.201 | NO                              |
| RBX1                  | 2                     | 1.543 | 0.922  | 2.583  | 0.099  | 0.173 | NO                              |
| RELA                  | 4                     | 1.103 | 0.748  | 1.626  | 0.622  | 0.692 | NO                              |
| TF                    | 4                     | 1.464 | 0.882  | 2.43   | 0.14   | 0.222 | NO                              |
| TIMP1                 | 4                     | 1.305 | 0.932  | 1.828  | 0.121  | 0.201 | NO                              |
| TLR4                  | 2                     | 0.69  | 0.459  | 1.038  | 0.075  | 0.142 | NO                              |
| VHL                   | 3                     | 1.334 | 0.782  | 2.273  | 0.29   | 0.384 | NO                              |

**S5. Pooled prognostic value of TME cells based on pooled four training cohorts  
(meta-analysis,n=452)**

| TME cells                     | Subgroup   | Pooled results(n=452) |       |        |        |        |        | Included in TME Score Model |
|-------------------------------|------------|-----------------------|-------|--------|--------|--------|--------|-----------------------------|
|                               |            | Freq of cohorts       | HR    | 95CI_L | 95CI_U | pvalue | FDR    |                             |
| aDC                           | Myeloid    | 4                     | 0.745 | 0.487  | 1.142  | 0.177  | 0.262  | NO                          |
| Adipocytes                    | Stroma     | 4                     | 0.578 | 0.368  | 0.908  | 0.017  | 0.045  | YES                         |
| Astrocytes                    | Epithelial | 4                     | 1.235 | 0.875  | 1.743  | 0.231  | 0.323  | NO                          |
| Basophils                     | Myeloid    | 4                     | 1.578 | 1.102  | 2.259  | 0.013  | 0.039  | YES                         |
| B-cells                       | Lymphoid   | 4                     | 0.547 | 0.379  | 0.789  | 0.001  | 0.008  | YES                         |
| CD4+ memory T-cells           | Lymphoid   | 4                     | 1.004 | 0.673  | 1.497  | 0.986  | 0.992  | NO                          |
| CD4+ naive T-cells            | Lymphoid   | 4                     | 0.752 | 0.52   | 1.09   | 0.132  | 0.213  | NO                          |
| CD4+ T-cells                  | Lymphoid   | 4                     | 1.339 | 0.669  | 2.68   | 0.41   | 0.503  | NO                          |
| CD4+ Tcm                      | Lymphoid   | 4                     | 0.711 | 0.476  | 1.06   | 0.094  | 0.167  | NO                          |
| CD4+ Tem                      | Lymphoid   | 4                     | 0.75  | 0.483  | 1.163  | 0.199  | 0.287  | NO                          |
| CD8+ naive T-cells            | Lymphoid   | 4                     | 1.407 | 0.977  | 2.027  | 0.067  | 0.128  | NO                          |
| CD8+ T-cells                  | Lymphoid   | 4                     | 0.887 | 0.598  | 1.316  | 0.552  | 0.638  | NO                          |
| CD8+ Tcm                      | Lymphoid   | 4                     | 0.51  | 0.343  | 0.759  | 0.001  | 0.006  | YES                         |
| CD8+ Tem                      | Lymphoid   | 4                     | 0.41  | 0.281  | 0.598  | <0.001 | <0.001 | YES                         |
| cDC                           | Myeloid    | 4                     | 1.219 | 0.752  | 1.977  | 0.422  | 0.513  | NO                          |
| Chondrocytes                  | Stroma     | 4                     | 0.663 | 0.473  | 0.931  | 0.018  | 0.045  | YES                         |
| Class-switched memory B-cells | Lymphoid   | 4                     | 0.732 | 0.516  | 1.037  | 0.079  | 0.146  | NO                          |
| CLP                           | HSC        | 4                     | 1.223 | 0.861  | 1.738  | 0.26   | 0.358  | NO                          |
| CMP                           | HSC        | 4                     | 0.882 | 0.579  | 1.344  | 0.559  | 0.638  | NO                          |
| DC                            | Myeloid    | 4                     | 1.063 | 0.72   | 1.569  | 0.758  | 0.796  | NO                          |
| Endothelial cells             | Stroma     | 4                     | 0.756 | 0.449  | 1.271  | 0.291  | 0.384  | NO                          |
| Eosinophils                   | Myeloid    | 4                     | 0.587 | 0.418  | 0.825  | 0.002  | 0.011  | YES                         |
| Epithelial cells              | Epithelial | 4                     | 1.294 | 0.896  | 1.87   | 0.169  | 0.255  | NO                          |
| Erythrocytes                  | HSC        | 4                     | 1.566 | 0.908  | 2.704  | 0.107  | 0.185  | NO                          |
| Fibroblasts                   | Stroma     | 4                     | 0.694 | 0.48   | 1.004  | 0.053  | 0.114  | NO                          |
| GMP                           | HSC        | 4                     | 0.943 | 0.662  | 1.343  | 0.745  | 0.787  | NO                          |
| Hepatocytes                   | Epithelial | 4                     | 0.506 | 0.348  | 0.736  | <0.001 | 0.004  | YES                         |
| HSC                           | HSC        | 4                     | 0.759 | 0.541  | 1.066  | 0.112  | 0.189  | NO                          |
| iDC                           | Myeloid    | 4                     | 0.828 | 0.54   | 1.27   | 0.387  | 0.489  | NO                          |
| Keratinocytes                 | Epithelial | 4                     | 1.237 | 0.849  | 1.802  | 0.269  | 0.363  | NO                          |
| ly Endothelial cells          | Stroma     | 4                     | 0.378 | 0.14   | 1.016  | 0.054  | 0.115  | NO                          |
| Macrophages                   | Myeloid    | 4                     | 0.675 | 0.493  | 0.925  | 0.015  | 0.042  | YES                         |
| Macrophages M1                | Myeloid    | 4                     | 0.807 | 0.561  | 1.161  | 0.248  | 0.344  | NO                          |
| Macrophages M2                | Myeloid    | 4                     | 0.689 | 0.425  | 1.118  | 0.132  | 0.213  | NO                          |
| Mast cells                    | Myeloid    | 4                     | 1.819 | 1.282  | 2.579  | 0.001  | 0.006  | YES                         |
| Megakaryocytes                | HSC        | 4                     | 1.076 | 0.778  | 1.487  | 0.658  | 0.708  | NO                          |
| Melanocytes                   | Epithelial | 4                     | 0.834 | 0.559  | 1.243  | 0.373  | 0.474  | NO                          |
| Memory B-cells                | Lymphoid   | 4                     | 0.547 | 0.392  | 0.762  | <0.001 | 0.004  | YES                         |
| MEP                           | HSC        | 4                     | 2.016 | 1.243  | 3.272  | 0.005  | 0.017  | YES                         |
| Mesangial cells               | Stroma     | 4                     | 1.724 | 1.13   | 2.631  | 0.012  | 0.036  | YES                         |
| Monocytes                     | Myeloid    | 4                     | 0.761 | 0.519  | 1.114  | 0.16   | 0.247  | NO                          |
| MPP                           | HSC        | 4                     | 0.698 | 0.483  | 1.009  | 0.056  | 0.118  | NO                          |
| MSC                           | Stroma     | 4                     | 0.845 | 0.607  | 1.176  | 0.317  | 0.408  | NO                          |
| mv Endothelial cells          | Stroma     | 4                     | 0.715 | 0.502  | 1.018  | 0.063  | 0.126  | NO                          |
| Myocytes                      | Stroma     | 4                     | 1.096 | 0.791  | 1.517  | 0.583  | 0.661  | NO                          |
| naive B-cells                 | Lymphoid   | 4                     | 0.669 | 0.429  | 1.045  | 0.077  | 0.144  | NO                          |
| Neurons                       | Epithelial | 4                     | 1.126 | 0.733  | 1.73   | 0.587  | 0.662  | NO                          |
| Neutrophils                   | Myeloid    | 4                     | 1.372 | 0.892  | 2.11   | 0.15   | 0.234  | NO                          |
| NK cells                      | Lymphoid   | 4                     | 0.623 | 0.438  | 0.885  | 0.008  | 0.027  | YES                         |
| NKT                           | Lymphoid   | 4                     | 0.776 | 0.516  | 1.167  | 0.223  | 0.317  | NO                          |
| Osteoblast                    | Stroma     | 4                     | 0.854 | 0.535  | 1.363  | 0.508  | 0.6    | NO                          |
| pDC                           | Myeloid    | 4                     | 0.689 | 0.479  | 0.99   | 0.044  | 0.097  | NO                          |
| Pericytes                     | Stroma     | 4                     | 1.152 | 0.787  | 1.687  | 0.467  | 0.556  | NO                          |
| Plasma cells                  | Lymphoid   | 4                     | 0.59  | 0.419  | 0.83   | 0.002  | 0.011  | YES                         |
| Platelets                     | HSC        | 4                     | 0.963 | 0.699  | 1.327  | 0.82   | 0.845  | NO                          |
| Preadipocytes                 | Stroma     | 4                     | 0.349 | 0.234  | 0.52   | <0.001 | <0.001 | YES                         |
| pro B-cells                   | Lymphoid   | 4                     | 1.451 | 0.979  | 2.152  | 0.064  | 0.126  | NO                          |
| Sebocytes                     | Epithelial | 4                     | 1.46  | 1.013  | 2.102  | 0.042  | 0.096  | NO                          |
| Skeletal muscle cells         | Stroma     | 4                     | 0.965 | 0.6    | 1.553  | 0.885  | 0.901  | NO                          |
| Smooth muscle cells           | Stroma     | 4                     | 1.399 | 0.873  | 2.244  | 0.163  | 0.249  | NO                          |
| Tgd cells                     | Lymphoid   | 4                     | 1.729 | 1.213  | 2.465  | 0.002  | 0.011  | YES                         |
| Th1 cells                     | Lymphoid   | 4                     | 1.683 | 1.219  | 2.322  | 0.002  | 0.008  | YES                         |
| Th2 cells                     | Lymphoid   | 4                     | 1.845 | 1.297  | 2.625  | 0.001  | 0.005  | YES                         |
| Tregs                         | Lymphoid   | 4                     | 0.973 | 0.681  | 1.391  | 0.882  | 0.901  | NO                          |

### S6. The enrichment score of immune-related gene sets for HBV-related HCC cohorts

| Cohort     | ID                                                                                                                           | setSize | enrichmentScore | NES    | pvalue | p.adjust | qvalues | rank | leading_edge                   |
|------------|------------------------------------------------------------------------------------------------------------------------------|---------|-----------------|--------|--------|----------|---------|------|--------------------------------|
| Gao, Fudan | IMMUNE_SYSTEM_PROCESS                                                                                                        | 101.000 | 0.402           | 1.690  | 0.002  | 0.041    | 0.031   | 854  | tags=29%, list=13%, signal=25% |
| Gao, Fudan | IMMUNE_RESPONSE                                                                                                              | 65.000  | 0.450           | 1.749  | 0.002  | 0.041    | 0.031   | 854  | tags=31%, list=13%, signal=27% |
| Gao, Fudan | GO_SOMATIC_DIVERSIFICATION_OF_IMMUNE_RECEPTORS_VIA_GERMLINE_RECOMBINATION_WITHIN_A_SINGLE_LOCUS                              | 28.000  | -0.603          | -1.919 | 0.002  | 0.041    | 0.031   | 1106 | tags=43%, list=17%, signal=36% |
| GSE14520   | GO_IMMUNE_RESPONSE_REGULATING_SIGNALING_PATHWAY                                                                              | 471.000 | 0.378           | 1.566  | 0.001  | 0.010    | 0.006   | 2465 | tags=32%, list=20%, signal=27% |
| GSE14520   | IMMUNE_SYSTEM_PROCESS                                                                                                        | 301.000 | 0.494           | 1.962  | 0.001  | 0.010    | 0.006   | 1859 | tags=32%, list=15%, signal=28% |
| GSE14520   | GO_NEGATIVE_REGULATION_OF_IMMUNE_SYSTEM_PROCESS                                                                              | 369.000 | 0.416           | 1.680  | 0.002  | 0.010    | 0.006   | 2416 | tags=36%, list=19%, signal=30% |
| GSE14520   | GO_ADAPTIVE_IMMUNE_RESPONSE                                                                                                  | 351.000 | 0.582           | 2.343  | 0.002  | 0.010    | 0.006   | 1971 | tags=40%, list=16%, signal=34% |
| GSE14520   | GO_REGULATION_OF_IMMUNE_EFFECTOR_PROCESS                                                                                     | 333.000 | 0.532           | 2.133  | 0.002  | 0.010    | 0.006   | 1472 | tags=29%, list=12%, signal=26% |
| GSE14520   | GO_ADAPTIVE_IMMUNE_RESPONSE_BASED_ON_SOMATIC_RECOMBINATION_OF_IMMUNE_RECEPTORS_BUILT_FROM_IMMUNOGLOBULIN_SUPERFAMILY_DOMAINS | 221.000 | 0.571           | 2.202  | 0.002  | 0.010    | 0.006   | 1259 | tags=31%, list=10%, signal=29% |
| GSE14520   | IMMUNE_RESPONSE                                                                                                              | 214.000 | 0.556           | 2.138  | 0.002  | 0.010    | 0.006   | 1859 | tags=36%, list=15%, signal=31% |
| GSE14520   | GO_HUMORAL_IMMUNE_RESPONSE                                                                                                   | 207.000 | 0.682           | 2.608  | 0.002  | 0.010    | 0.006   | 1462 | tags=38%, list=12%, signal=34% |
| GSE14520   | GO_REGULATION_OF_ADAPTIVE_IMMUNE_RESPONSE                                                                                    | 136.000 | 0.469           | 1.705  | 0.002  | 0.010    | 0.006   | 2116 | tags=36%, list=17%, signal=30% |
| GSE14520   | GO_IMMUNE_RECEPTOR_ACTIVITY                                                                                                  | 113.000 | 0.565           | 2.006  | 0.002  | 0.010    | 0.006   | 2710 | tags=42%, list=22%, signal=33% |
| GSE14520   | GO_NEGATIVE_REGULATION_OF_IMMUNE_RESPONSE                                                                                    | 129.000 | 0.466           | 1.683  | 0.002  | 0.010    | 0.006   | 2403 | tags=37%, list=19%, signal=30% |
| GSE14520   | GO_REGULATION_OF_HUMORAL_IMMUNE_RESPONSE                                                                                     | 66.000  | 0.800           | 2.576  | 0.002  | 0.010    | 0.006   | 939  | tags=53%, list=8%, signal=49%  |
| GSE14520   | GO_NEGATIVE_REGULATION_OF_ADAPTIVE_IMMUNE_RESPONSE                                                                           | 41.000  | 0.614           | 1.804  | 0.002  | 0.010    | 0.006   | 2082 | tags=41%, list=17%, signal=35% |
| GSE14520   | KEGG_INTESTINAL_IMMUNE_NETWORK_FOR_IGA_PRODUCTION                                                                            | 41.000  | 0.689           | 2.026  | 0.002  | 0.010    | 0.006   | 1969 | tags=44%, list=16%, signal=37% |
| GSE14520   | GO_HUMORAL_IMMUNE_RESPONSE_MEDIATED_BY_CIRCULATING_IMMUNOGLOBULIN                                                            | 49.000  | 0.844           | 2.537  | 0.002  | 0.010    | 0.006   | 536  | tags=59%, list=4%, signal=57%  |
| GSE14520   | GO_IMMUNE_RESPONSE_REGULATING_CELL_SURFACE_RECEPTOR_SIGNALING_PATHWAY                                                        | 340.000 | 0.375           | 1.507  | 0.003  | 0.015    | 0.009   | 2278 | tags=30%, list=18%, signal=25% |
| GSE14520   | GO_NEGATIVE_REGULATION_OF_IMMUNE_EFFECTOR_PROCESS                                                                            | 109.000 | 0.503           | 1.781  | 0.003  | 0.015    | 0.009   | 2410 | tags=40%, list=19%, signal=33% |
| GSE14520   | GO_NEGATIVE_REGULATION_OF_HUMORAL_IMMUNE_RESPONSE                                                                            | 12.000  | 0.818           | 1.818  | 0.004  | 0.018    | 0.011   | 1431 | tags=67%, list=12%, signal=59% |
| GSE14520   | GO_REGULATION_OF_HUMORAL_IMMUNE_RESPONSE_MEDIATED_BY_CIRCULATING_IMMUNOGLOBULIN                                              | 11.000  | 0.815           | 1.775  | 0.006  | 0.025    | 0.015   | 1356 | tags=55%, list=11%, signal=49% |
| GSE14520   | GO_POSITIVE_REGULATION_OF_IMMUNE_EFFECTOR_PROCESS                                                                            | 181.000 | 0.391           | 1.476  | 0.006  | 0.025    | 0.015   | 2274 | tags=31%, list=18%, signal=26% |
| GSE14520   | HUMORAL_IMMUNE_RESPONSE                                                                                                      | 30.000  | 0.630           | 1.751  | 0.008  | 0.030    | 0.018   | 1462 | tags=33%, list=12%, signal=29% |
| GSE14520   | GO_ANTIMICROBIAL_HUMORAL_IMMUNE_RESPONSE_MEDIATED_BY_ANTIMICROBIAL_PEPTIDE                                                   | 52.000  | 0.522           | 1.600  | 0.011  | 0.039    | 0.023   | 1082 | tags=19%, list=9%, signal=18%  |
| GSE14520   | GO_TYPE_2_IMMUNE_RESPONSE                                                                                                    | 34.000  | 0.597           | 1.705  | 0.011  | 0.039    | 0.023   | 2316 | tags=50%, list=19%, signal=41% |
| GSE14520   | GO_REGULATION_OF_TYPE_2_IMMUNE_RESPONSE                                                                                      | 30.000  | 0.619           | 1.720  | 0.012  | 0.039    | 0.023   | 2316 | tags=53%, list=19%, signal=43% |
| GSE14520   | IMMUNE_EFFECTOR_PROCESS                                                                                                      | 33.000  | 0.586           | 1.671  | 0.013  | 0.042    | 0.025   | 1830 | tags=33%, list=15%, signal=28% |
| GSE10143   | GO_INNATE_IMMUNE_RESPONSE                                                                                                    | 478.000 | 0.327           | 1.523  | 0.001  | 0.006    | 0.003   | 1166 | tags=26%, list=19%, signal=22% |
| GSE10143   | GO_POSITIVE_REGULATION_OF_IMMUNE_RESPONSE                                                                                    | 425.000 | 0.393           | 1.816  | 0.001  | 0.006    | 0.003   | 1166 | tags=29%, list=19%, signal=25% |
| GSE10143   | GO_CELL_ACTIVATION_INVOLVED_IN_IMMUNE_RESPONSE                                                                               | 421.000 | 0.346           | 1.593  | 0.001  | 0.006    | 0.003   | 1142 | tags=26%, list=19%, signal=23% |
| GSE10143   | REACTOME_ADAPTIVE_IMMUNE_SYSTEM                                                                                              | 375.000 | 0.368           | 1.675  | 0.001  | 0.006    | 0.003   | 1119 | tags=29%, list=18%, signal=26% |
| GSE10143   | GO_IMMUNE_RESPONSE_REGULATING_SIGNALING_PATHWAY                                                                              | 300.000 | 0.422           | 1.878  | 0.001  | 0.006    | 0.003   | 1119 | tags=30%, list=18%, signal=26% |
| GSE10143   | GO_ACTIVATION_OF_IMMUNE_RESPONSE                                                                                             | 326.000 | 0.421           | 1.879  | 0.001  | 0.006    | 0.003   | 1142 | tags=29%, list=19%, signal=25% |
| GSE10143   | GO_ADAPTIVE_IMMUNE_RESPONSE                                                                                                  | 237.000 | 0.527           | 2.283  | 0.001  | 0.006    | 0.003   | 1173 | tags=40%, list=19%, signal=34% |
| GSE10143   | GO_NEGATIVE_REGULATION_OF_IMMUNE_SYSTEM_PROCESS                                                                              | 250.000 | 0.406           | 1.768  | 0.001  | 0.006    | 0.003   | 1302 | tags=32%, list=21%, signal=27% |
| GSE10143   | IMMUNE_SYSTEM_PROCESS                                                                                                        | 209.000 | 0.598           | 2.544  | 0.001  | 0.006    | 0.003   | 1054 | tags=43%, list=17%, signal=37% |
| GSE10143   | GO_REGULATION_OF_IMMUNE_EFFECTOR_PROCESS                                                                                     | 226.000 | 0.404           | 1.735  | 0.001  | 0.006    | 0.003   | 1157 | tags=29%, list=19%, signal=24% |
| GSE10143   | GO_IMMUNE_RESPONSE_REGULATING_CELL_SURFACE_RECEPTOR_SIGNALING_PATHWAY                                                        | 227.000 | 0.452           | 1.942  | 0.001  | 0.006    | 0.003   | 1119 | tags=32%, list=18%, signal=27% |
| GSE10143   | GO_ADAPTIVE_IMMUNE_RESPONSE_BASED_ON_SOMATIC_RECOMBINATION_OF_IMMUNE_RECEPTORS_BUILT_FROM_IMMUNOGLOBULIN_SUPERFAMILY_DOMAINS | 164.000 | 0.427           | 1.770  | 0.001  | 0.006    | 0.003   | 1166 | tags=34%, list=19%, signal=28% |
| GSE10143   | GO_HUMORAL_IMMUNE_RESPONSE                                                                                                   | 153.000 | 0.428           | 1.759  | 0.002  | 0.006    | 0.003   | 1155 | tags=32%, list=19%, signal=27% |

### S6. The enrichment score of immune-related gene sets for HBV-related HCC cohorts

| Cohort   | ID                                                                                                                           | setSize | enrichmentScore | NES   | pvalue | p.adjust | qvalues | rank | leading_edge                   |
|----------|------------------------------------------------------------------------------------------------------------------------------|---------|-----------------|-------|--------|----------|---------|------|--------------------------------|
| GSE10143 | IMMUNE_RESPONSE                                                                                                              | 153.000 | 0.614           | 2.524 | 0.002  | 0.006    | 0.003   | 948  | tags=43%, list=16%, signal=37% |
| GSE10143 | GO_REGULATION_OF_ADAPTIVE_IMMUNE_RESPONSE                                                                                    | 100.000 | 0.466           | 1.806 | 0.002  | 0.006    | 0.003   | 1647 | tags=48%, list=27%, signal=36% |
| GSE10143 | GO_IMMUNE_RECEPTOR_ACTIVITY                                                                                                  | 81.000  | 0.542           | 2.009 | 0.002  | 0.006    | 0.003   | 906  | tags=38%, list=15%, signal=33% |
| GSE10143 | GO_NEGATIVE_REGULATION_OF_IMMUNE_EFFECTOR_PROCESS                                                                            | 72.000  | 0.470           | 1.700 | 0.002  | 0.006    | 0.003   | 1344 | tags=33%, list=22%, signal=26% |
| GSE10143 | GO_T_CELL_DIFFERENTIATION_INVOLVED_IN_IMMUNE_RESPONSE                                                                        | 36.000  | 0.560           | 1.804 | 0.002  | 0.006    | 0.003   | 424  | tags=33%, list=7%, signal=31%  |
| GSE10143 | KEGG_INTESTINAL_IMMUNE_NETWORK_FOR_IGA_PRODUCTION                                                                            | 35.000  | 0.643           | 2.058 | 0.002  | 0.006    | 0.003   | 1320 | tags=66%, list=22%, signal=52% |
| GSE10143 | REGULATION_OF_IMMUNE_SYSTEM_PROCESS                                                                                          | 37.000  | 0.599           | 1.943 | 0.002  | 0.006    | 0.003   | 1529 | tags=59%, list=25%, signal=45% |
| GSE10143 | POSITIVE_REGULATION_OF_IMMUNE_SYSTEM_PROCESS                                                                                 | 28.000  | 0.682           | 2.084 | 0.002  | 0.006    | 0.003   | 1023 | tags=54%, list=17%, signal=45% |
| GSE10143 | GO_T_HELPER_1_TYPE_IMMUNE_RESPONSE                                                                                           | 25.000  | 0.595           | 1.761 | 0.002  | 0.006    | 0.003   | 948  | tags=48%, list=16%, signal=41% |
| GSE10143 | HUMORAL_IMMUNE_RESPONSE                                                                                                      | 24.000  | 0.616           | 1.828 | 0.003  | 0.011    | 0.006   | 1416 | tags=62%, list=23%, signal=48% |
| GSE10143 | GO_POSITIVE_REGULATION_OF_T_HELPER_1_TYPE_IMMUNE_RESPONSE                                                                    | 12.000  | 0.724           | 1.823 | 0.004  | 0.011    | 0.006   | 805  | tags=50%, list=13%, signal=43% |
| GSE10143 | GO_T_CELL_ACTIVATION_INVOLVED_IN_IMMUNE_RESPONSE                                                                             | 61.000  | 0.467           | 1.655 | 0.008  | 0.024    | 0.013   | 424  | tags=23%, list=7%, signal=22%  |
| GSE10143 | GO_REGULATION_OF_T_HELPER_1_TYPE_IMMUNE_RESPONSE                                                                             | 16.000  | 0.651           | 1.754 | 0.009  | 0.026    | 0.014   | 424  | tags=38%, list=7%, signal=35%  |
| GSE10143 | GO_LYMPHOCYTE_ACTIVATION_INVOLVED_IN_IMMUNE_RESPONSE                                                                         | 96.000  | 0.388           | 1.485 | 0.011  | 0.030    | 0.016   | 557  | tags=20%, list=9%, signal=18%  |
| GSE10143 | GO_POSITIVE_REGULATION_OF_ADAPTIVE_IMMUNE_RESPONSE                                                                           | 65.000  | 0.427           | 1.515 | 0.011  | 0.030    | 0.016   | 1335 | tags=40%, list=22%, signal=32% |
| GSE10143 | GO_HUMORAL_IMMUNE_RESPONSE_MEDIATED_BY_CIRCULATING_IMMUNOGLOBULIN                                                            | 36.000  | 0.500           | 1.609 | 0.015  | 0.038    | 0.020   | 1155 | tags=36%, list=19%, signal=29% |
| GSE10143 | GO_POSITIVE_REGULATION_OF_IMMUNE_EFFECTOR_PROCESS                                                                            | 129.000 | 0.346           | 1.386 | 0.017  | 0.041    | 0.022   | 1573 | tags=40%, list=26%, signal=31% |
| GSE10143 | POSITIVE_REGULATION_OF_IMMUNE_RESPONSE                                                                                       | 15.000  | 0.610           | 1.630 | 0.018  | 0.043    | 0.023   | 948  | tags=47%, list=16%, signal=40% |
| GSE10143 | GO_NEGATIVE_REGULATION_OF_IMMUNE_RESPONSE                                                                                    | 93.000  | 0.381           | 1.450 | 0.019  | 0.043    | 0.023   | 1137 | tags=28%, list=19%, signal=23% |
| TCGA     | GO_NEGATIVE_REGULATION_OF_IMMUNE_SYSTEM_PROCESS                                                                              | 430.000 | 0.449           | 1.574 | 0.001  | 0.009    | 0.005   | 3406 | tags=35%, list=17%, signal=30% |
| TCGA     | GO_ADAPTIVE_IMMUNE_RESPONSE                                                                                                  | 395.000 | 0.571           | 1.989 | 0.001  | 0.009    | 0.005   | 3414 | tags=43%, list=17%, signal=36% |
| TCGA     | GO_REGULATION_OF_IMMUNE_EFFECTOR_PROCESS                                                                                     | 375.000 | 0.579           | 2.008 | 0.001  | 0.009    | 0.005   | 3159 | tags=37%, list=16%, signal=32% |
| TCGA     | IMMUNE_SYSTEM_PROCESS                                                                                                        | 326.000 | 0.532           | 1.825 | 0.001  | 0.009    | 0.005   | 3331 | tags=40%, list=17%, signal=33% |
| TCGA     | GO_ADAPTIVE_IMMUNE_RESPONSE_BASED_ON_SOMATIC_RECOMBINATION_OF_IMMUNE_RECEPTORS_BUILT_FROM_IMMUNOGLOBULIN_SUPERFAMILY_DOMAINS | 244.000 | 0.578           | 1.942 | 0.001  | 0.009    | 0.005   | 2598 | tags=36%, list=13%, signal=32% |
| TCGA     | GO_HUMORAL_IMMUNE_RESPONSE                                                                                                   | 235.000 | 0.638           | 2.136 | 0.001  | 0.009    | 0.005   | 1967 | tags=33%, list=10%, signal=30% |
| TCGA     | IMMUNE_RESPONSE                                                                                                              | 229.000 | 0.610           | 2.038 | 0.001  | 0.009    | 0.005   | 3314 | tags=44%, list=17%, signal=37% |
| TCGA     | GO_POSITIVE_REGULATION_OF_IMMUNE_EFFECTOR_PROCESS                                                                            | 201.000 | 0.480           | 1.585 | 0.001  | 0.009    | 0.005   | 3386 | tags=36%, list=17%, signal=30% |
| TCGA     | GO_REGULATION_OF_ADAPTIVE_IMMUNE_RESPONSE                                                                                    | 153.000 | 0.520           | 1.666 | 0.001  | 0.009    | 0.005   | 3314 | tags=37%, list=17%, signal=31% |
| TCGA     | GO_IMMUNE_RECEPTOR_ACTIVITY                                                                                                  | 126.000 | 0.600           | 1.886 | 0.001  | 0.009    | 0.005   | 3279 | tags=41%, list=17%, signal=35% |
| TCGA     | GO_NEGATIVE_REGULATION_OF_IMMUNE_EFFECTOR_PROCESS                                                                            | 117.000 | 0.556           | 1.717 | 0.001  | 0.009    | 0.005   | 3222 | tags=39%, list=16%, signal=33% |
| TCGA     | GO_REGULATION_OF_HUMORAL_IMMUNE_RESPONSE                                                                                     | 70.000  | 0.814           | 2.330 | 0.002  | 0.009    | 0.005   | 1739 | tags=63%, list=9%, signal=57%  |
| TCGA     | GO_HUMORAL_IMMUNE_RESPONSE_MEDIATED_BY_CIRCULATING_IMMUNOGLOBULIN                                                            | 47.000  | 0.827           | 2.239 | 0.002  | 0.009    | 0.005   | 916  | tags=62%, list=5%, signal=59%  |
| TCGA     | KEGG_INTESTINAL_IMMUNE_NETWORK_FOR_IGA_PRODUCTION                                                                            | 46.000  | 0.721           | 1.939 | 0.002  | 0.009    | 0.005   | 3314 | tags=57%, list=17%, signal=47% |
| TCGA     | GO_NATURAL_KILLER_CELL_ACTIVATION_INVOLVED_IN_IMMUNE_RESPONSE                                                                | 31.000  | 0.748           | 1.863 | 0.002  | 0.009    | 0.005   | 2553 | tags=23%, list=13%, signal=20% |
| TCGA     | GO_NEGATIVE_REGULATION_OF_IMMUNE_RESPONSE                                                                                    | 146.000 | 0.520           | 1.659 | 0.003  | 0.014    | 0.008   | 2895 | tags=35%, list=15%, signal=30% |
| TCGA     | IMMUNE_EFFECTOR_PROCESS                                                                                                      | 38.000  | 0.666           | 1.726 | 0.003  | 0.015    | 0.009   | 1383 | tags=32%, list=7%, signal=29%  |
| TCGA     | GO_REGULATION_OF_CYTOKINE_PRODUCTION_INVOLVED_IN_IMMUNE_RESPONSE                                                             | 85.000  | 0.521           | 1.541 | 0.006  | 0.026    | 0.015   | 3222 | tags=38%, list=16%, signal=32% |
| TCGA     | GO_TYPE_2_IMMUNE_RESPONSE                                                                                                    | 38.000  | 0.645           | 1.671 | 0.006  | 0.026    | 0.015   | 3620 | tags=50%, list=19%, signal=41% |
| TCGA     | GO_REGULATION_OF_TYPE_2_IMMUNE_RESPONSE                                                                                      | 31.000  | 0.672           | 1.673 | 0.006  | 0.026    | 0.015   | 3620 | tags=58%, list=19%, signal=47% |
| TCGA     | GO_REGULATION_OF_PRODUCTION_OF_MOLECULAR_MEDIATOR_OF_IMMUNE_RESPONSE                                                         | 135.000 | 0.469           | 1.487 | 0.008  | 0.032    | 0.018   | 3386 | tags=36%, list=17%, signal=30% |
| TCGA     | GO_PRODUCTION_OF_MOLECULAR_MEDIATOR_OF_IMMUNE_RESPONSE                                                                       | 195.000 | 0.428           | 1.413 | 0.009  | 0.033    | 0.019   | 3386 | tags=32%, list=17%, signal=27% |
| TCGA     | GO_NEGATIVE_REGULATION_OF_ADAPTIVE_IMMUNE_RESPONSE                                                                           | 46.000  | 0.612           | 1.647 | 0.010  | 0.033    | 0.019   | 3222 | tags=43%, list=16%, signal=36% |
| TCGA     | GO_CYTOKINE_PRODUCTION_INVOLVED_IN_IMMUNE_RESPONSE                                                                           | 103.000 | 0.489           | 1.486 | 0.012  | 0.040    | 0.023   | 3222 | tags=36%, list=16%, signal=30% |

**S7. The correlation of Hypoxia score and TME score in 21 HCC cohorts and 5 HBV-related HCC cohorts**

| All HCC patients |             | HBV-related HCC patients |              |            |             |
|------------------|-------------|--------------------------|--------------|------------|-------------|
| dataset          | cor         | p.value                  | dataset      | cor        | p.value     |
| GSE9843          | -0.48904568 | 8.71E-07                 | TCGA_LIHC    | -0.536237  | 4.30578E-12 |
| GSE76427         | -0.34721097 | 4.28E-06                 | ICGC_LIRI_JP | -0.3271352 | 0.01680316  |
| GSE109211        | -0.39330548 | 1.53E-06                 | GSE14520     | -0.5393331 | 4.45143E-18 |
| GSE10143         | 0.15191543  | 2.73E-03                 | Fudandata    | -0.2284428 | 0.003776837 |
| GSE19977         | -0.18849548 | 1.56E-02                 | GSE10143     | 0.2549266  | 0.2922078   |
| GSE22058         | -0.39435432 | 9.82E-09                 |              |            |             |
| GSE25097         | -0.38628831 | 2.90E-21                 |              |            |             |
| GSE43619         | -0.38985494 | 1.74E-04                 |              |            |             |
| GSE45267         | -0.7447641  | 1.35E-16                 |              |            |             |
| GSE46444         | 0.05217944  | 5.46E-01                 |              |            |             |
| GSE54236         | -0.30253769 | 9.59E-05                 |              |            |             |
| GSE63898         | -0.29264702 | 2.93E-09                 |              |            |             |
| GSE64041         | -0.37257905 | 1.88E-05                 |              |            |             |
| GSE84402         | -0.40995592 | 3.03E-02                 |              |            |             |
| GSE112790        | -0.58265132 | 2.16E-19                 |              |            |             |
| ICGC_LIRI_JP     | -0.35063656 | 1.07E-12                 |              |            |             |
| TCGA_LIHC        | -0.44779741 | 2.67E-22                 |              |            |             |
| GSE14520         | -0.53933307 | 4.45E-18                 |              |            |             |
| Fudandata        | -0.27305123 | 7.64E-07                 |              |            |             |
| GSE124751        | -0.53528312 | 1.14E-16                 |              |            |             |
| GSE15654         | 0.0599063   | 3.81E-01                 |              |            |             |

S8. The detailed Hypoxia-TME score of all included HBV-related HCC patients (n=596)

| Sample_names | OS_time | OS   | TME score | Hypoxia Score | TME subgroup | Hypoxia subgroup | Hypoxia-TME subgroup                        | Dataset   |
|--------------|---------|------|-----------|---------------|--------------|------------------|---------------------------------------------|-----------|
| T1013        | 10.43   | 1.00 | -1.04     | 0.16          | FALSE        | TRUE             | Hypoxia <sup>high</sup> /TME <sup>low</sup> | Fudandata |
| T1015        | 29.60   | 0.00 | 1.21      | -1.23         | TRUE         | FALSE            | Hypoxia <sup>low</sup> /TME <sup>high</sup> | Fudandata |
| T1021        | 11.03   | 1.00 | -1.20     | -0.29         | FALSE        | FALSE            | Mixed                                       | Fudandata |
| T1025        | 29.67   | 0.00 | 0.01      | 0.28          | TRUE         | TRUE             | Mixed                                       | Fudandata |
| T1027        | 18.80   | 1.00 | -0.10     | 1.35          | FALSE        | TRUE             | Hypoxia <sup>high</sup> /TME <sup>low</sup> | Fudandata |
| T1031        | 32.77   | 0.00 | 0.46      | 0.05          | TRUE         | TRUE             | Mixed                                       | Fudandata |
| T1041        | 32.43   | 0.00 | -0.38     | -0.73         | FALSE        | FALSE            | Mixed                                       | Fudandata |
| T1043        | 32.60   | 0.00 | 1.13      | 0.68          | TRUE         | TRUE             | Mixed                                       | Fudandata |
| T1045        | 32.53   | 0.00 | 1.68      | -0.36         | TRUE         | FALSE            | Hypoxia <sup>low</sup> /TME <sup>high</sup> | Fudandata |
| T112         | 47.90   | 0.00 | -0.18     | -0.46         | FALSE        | FALSE            | Mixed                                       | Fudandata |
| T113         | 49.60   | 0.00 | 0.02      | 0.18          | TRUE         | TRUE             | Mixed                                       | Fudandata |
| T123         | 15.67   | 1.00 | 0.15      | -0.94         | TRUE         | FALSE            | Hypoxia <sup>low</sup> /TME <sup>high</sup> | Fudandata |
| T125         | 9.30    | 1.00 | -0.46     | 1.91          | FALSE        | TRUE             | Hypoxia <sup>high</sup> /TME <sup>low</sup> | Fudandata |
| T127         | 48.30   | 0.00 | 0.09      | -1.07         | TRUE         | FALSE            | Hypoxia <sup>low</sup> /TME <sup>high</sup> | Fudandata |
| T131         | 48.30   | 0.00 | -1.00     | -0.29         | FALSE        | FALSE            | Mixed                                       | Fudandata |
| T135         | 25.33   | 1.00 | 0.74      | 0.86          | TRUE         | TRUE             | Mixed                                       | Fudandata |
| T137         | 48.10   | 0.00 | 1.30      | -0.18         | TRUE         | FALSE            | Hypoxia <sup>low</sup> /TME <sup>high</sup> | Fudandata |
| T141         | 49.77   | 0.00 | 1.35      | -0.20         | TRUE         | FALSE            | Hypoxia <sup>low</sup> /TME <sup>high</sup> | Fudandata |
| T145         | 49.83   | 0.00 | 0.97      | -0.07         | TRUE         | FALSE            | Hypoxia <sup>low</sup> /TME <sup>high</sup> | Fudandata |
| T147         | 30.00   | 1.00 | 0.54      | -0.65         | TRUE         | FALSE            | Hypoxia <sup>low</sup> /TME <sup>high</sup> | Fudandata |
| T161         | 47.80   | 0.00 | -1.92     | -1.00         | FALSE        | FALSE            | Mixed                                       | Fudandata |
| T171         | 14.53   | 1.00 | -0.27     | -0.87         | FALSE        | FALSE            | Mixed                                       | Fudandata |
| T187         | 47.10   | 0.00 | 1.85      | -0.21         | TRUE         | FALSE            | Hypoxia <sup>low</sup> /TME <sup>high</sup> | Fudandata |
| T191         | 47.10   | 0.00 | 0.92      | 0.51          | TRUE         | TRUE             | Mixed                                       | Fudandata |
| T195         | 47.00   | 0.00 | 0.90      | 0.31          | TRUE         | TRUE             | Mixed                                       | Fudandata |
| T211         | 10.00   | 1.00 | 0.67      | 1.23          | TRUE         | TRUE             | Mixed                                       | Fudandata |
| T217         | 46.80   | 0.00 | 1.57      | 0.43          | TRUE         | TRUE             | Mixed                                       | Fudandata |
| T221         | 46.80   | 0.00 | -0.11     | -0.77         | FALSE        | FALSE            | Mixed                                       | Fudandata |
| T223         | 46.90   | 0.00 | 2.16      | 1.15          | TRUE         | TRUE             | Mixed                                       | Fudandata |
| T227         | 46.70   | 0.00 | 0.18      | 0.56          | TRUE         | TRUE             | Mixed                                       | Fudandata |
| T231         | 46.87   | 0.00 | -0.56     | -0.68         | FALSE        | FALSE            | Mixed                                       | Fudandata |
| T257         | 46.23   | 0.00 | 0.08      | 2.44          | TRUE         | TRUE             | Mixed                                       | Fudandata |
| T261         | 46.23   | 0.00 | 0.64      | -1.35         | TRUE         | FALSE            | Hypoxia <sup>low</sup> /TME <sup>high</sup> | Fudandata |
| T267         | 45.43   | 1.00 | -1.09     | -0.26         | FALSE        | FALSE            | Mixed                                       | Fudandata |
| T271         | 46.10   | 0.00 | 0.05      | -0.39         | TRUE         | FALSE            | Hypoxia <sup>low</sup> /TME <sup>high</sup> | Fudandata |
| T277         | 42.40   | 1.00 | -1.24     | -0.64         | FALSE        | FALSE            | Mixed                                       | Fudandata |
| T283         | 4.77    | 1.00 | -0.34     | 2.22          | FALSE        | TRUE             | Hypoxia <sup>high</sup> /TME <sup>low</sup> | Fudandata |
| T285         | 10.57   | 1.00 | -1.42     | 1.75          | FALSE        | TRUE             | Hypoxia <sup>high</sup> /TME <sup>low</sup> | Fudandata |
| T311         | 8.97    | 1.00 | -0.28     | 0.75          | FALSE        | TRUE             | Hypoxia <sup>high</sup> /TME <sup>low</sup> | Fudandata |
| T313         | 19.77   | 1.00 | -1.12     | 2.47          | FALSE        | TRUE             | Hypoxia <sup>high</sup> /TME <sup>low</sup> | Fudandata |
| T327         | 44.83   | 0.00 | 0.21      | -0.97         | TRUE         | FALSE            | Hypoxia <sup>low</sup> /TME <sup>high</sup> | Fudandata |
| T331         | 4.67    | 1.00 | -1.32     | 1.16          | FALSE        | TRUE             | Hypoxia <sup>high</sup> /TME <sup>low</sup> | Fudandata |
| T341         | 44.73   | 0.00 | 0.26      | -0.65         | TRUE         | FALSE            | Hypoxia <sup>low</sup> /TME <sup>high</sup> | Fudandata |
| T343         | 43.93   | 1.00 | 0.35      | 0.88          | TRUE         | TRUE             | Mixed                                       | Fudandata |
| T351         | 10.83   | 1.00 | -1.82     | 0.96          | FALSE        | TRUE             | Hypoxia <sup>high</sup> /TME <sup>low</sup> | Fudandata |
| T353         | 45.90   | 0.00 | 1.52      | -0.92         | TRUE         | FALSE            | Hypoxia <sup>low</sup> /TME <sup>high</sup> | Fudandata |
| T355         | 44.37   | 0.00 | -1.39     | -0.01         | FALSE        | FALSE            | Mixed                                       | Fudandata |
| T357         | 44.37   | 0.00 | -0.84     | -1.37         | FALSE        | FALSE            | Mixed                                       | Fudandata |
| T361         | 45.30   | 0.00 | 0.18      | 0.00          | TRUE         | FALSE            | Hypoxia <sup>low</sup> /TME <sup>high</sup> | Fudandata |
| T363         | 44.30   | 0.00 | 0.16      | 0.28          | TRUE         | TRUE             | Mixed                                       | Fudandata |
| T365         | 44.00   | 0.00 | 1.55      | -0.38         | TRUE         | FALSE            | Hypoxia <sup>low</sup> /TME <sup>high</sup> | Fudandata |
| T367         | 44.30   | 0.00 | -0.58     | 1.51          | FALSE        | TRUE             | Hypoxia <sup>high</sup> /TME <sup>low</sup> | Fudandata |
| T375         | 44.67   | 0.00 | -0.82     | 1.62          | FALSE        | TRUE             | Hypoxia <sup>high</sup> /TME <sup>low</sup> | Fudandata |
| T383         | 10.37   | 1.00 | 1.02      | -0.66         | TRUE         | FALSE            | Hypoxia <sup>low</sup> /TME <sup>high</sup> | Fudandata |
| T385         | 44.00   | 0.00 | -0.17     | 2.08          | FALSE        | TRUE             | Hypoxia <sup>high</sup> /TME <sup>low</sup> | Fudandata |
| T387         | 43.97   | 0.00 | -0.82     | 1.71          | FALSE        | TRUE             | Hypoxia <sup>high</sup> /TME <sup>low</sup> | Fudandata |
| T391         | 43.93   | 0.00 | -0.38     | 1.66          | FALSE        | TRUE             | Hypoxia <sup>high</sup> /TME <sup>low</sup> | Fudandata |
| T393         | 43.93   | 0.00 | -0.17     | 0.58          | FALSE        | TRUE             | Hypoxia <sup>high</sup> /TME <sup>low</sup> | Fudandata |
| T395         | 43.87   | 0.00 | -0.06     | 0.01          | FALSE        | TRUE             | Hypoxia <sup>high</sup> /TME <sup>low</sup> | Fudandata |
| T411         | 43.80   | 0.00 | -0.32     | -0.96         | FALSE        | FALSE            | Mixed                                       | Fudandata |
| T413         | 10.30   | 1.00 | -1.31     | 1.28          | FALSE        | TRUE             | Hypoxia <sup>high</sup> /TME <sup>low</sup> | Fudandata |
| T415         | 43.23   | 0.00 | 1.54      | -0.14         | TRUE         | FALSE            | Hypoxia <sup>low</sup> /TME <sup>high</sup> | Fudandata |
| T421         | 26.53   | 1.00 | 0.96      | 0.18          | TRUE         | TRUE             | Mixed                                       | Fudandata |
| T423         | 43.23   | 0.00 | 0.15      | -1.26         | TRUE         | FALSE            | Hypoxia <sup>low</sup> /TME <sup>high</sup> | Fudandata |
| T425         | 43.30   | 0.00 | -0.81     | -1.69         | FALSE        | FALSE            | Mixed                                       | Fudandata |
| T427         | 44.73   | 0.00 | -1.01     | -0.03         | FALSE        | FALSE            | Mixed                                       | Fudandata |
| T431         | 43.00   | 0.00 | 0.29      | -1.49         | TRUE         | FALSE            | Hypoxia <sup>low</sup> /TME <sup>high</sup> | Fudandata |
| T433         | 43.00   | 0.00 | -0.87     | -1.05         | FALSE        | FALSE            | Mixed                                       | Fudandata |
| T435         | 44.70   | 0.00 | 1.34      | -2.20         | TRUE         | FALSE            | Hypoxia <sup>low</sup> /TME <sup>high</sup> | Fudandata |
| T443         | 44.20   | 0.00 | 0.25      | -0.13         | TRUE         | FALSE            | Hypoxia <sup>low</sup> /TME <sup>high</sup> | Fudandata |
| T445         | 14.03   | 1.00 | 0.37      | -1.39         | TRUE         | FALSE            | Hypoxia <sup>low</sup> /TME <sup>high</sup> | Fudandata |
| T451         | 23.83   | 1.00 | 0.07      | -0.99         | TRUE         | FALSE            | Hypoxia <sup>low</sup> /TME <sup>high</sup> | Fudandata |
| T455         | 36.47   | 1.00 | -0.07     | 0.67          | FALSE        | TRUE             | Hypoxia <sup>high</sup> /TME <sup>low</sup> | Fudandata |

|      |       |      |       |       |       |       |                                             |           |
|------|-------|------|-------|-------|-------|-------|---------------------------------------------|-----------|
| T461 | 42.87 | 0.00 | 1.85  | -0.30 | TRUE  | FALSE | Hypoxia <sup>low</sup> /TME <sup>high</sup> | Fudandata |
| T463 | 17.73 | 1.00 | -1.20 | 0.60  | FALSE | TRUE  | Hypoxia <sup>high</sup> /TME <sup>low</sup> | Fudandata |
| T465 | 43.23 | 0.00 | 0.21  | -1.19 | TRUE  | FALSE | Hypoxia <sup>low</sup> /TME <sup>high</sup> | Fudandata |
| T467 | 42.83 | 0.00 | 1.22  | -0.51 | TRUE  | FALSE | Hypoxia <sup>low</sup> /TME <sup>high</sup> | Fudandata |
| T471 | 42.83 | 0.00 | 1.01  | -0.07 | TRUE  | FALSE | Hypoxia <sup>low</sup> /TME <sup>high</sup> | Fudandata |
| T473 | 42.20 | 0.00 | -0.83 | -0.42 | FALSE | FALSE | Mixed                                       | Fudandata |
| T477 | 29.63 | 1.00 | -0.41 | -0.92 | FALSE | FALSE | Mixed                                       | Fudandata |
| T481 | 42.63 | 0.00 | 1.58  | -0.37 | TRUE  | FALSE | Hypoxia <sup>low</sup> /TME <sup>high</sup> | Fudandata |
| T483 | 42.70 | 0.00 | -0.65 | -0.64 | FALSE | FALSE | Mixed                                       | Fudandata |
| T487 | 42.60 | 0.00 | 0.70  | 0.24  | TRUE  | TRUE  | Mixed                                       | Fudandata |
| T491 | 15.30 | 1.00 | 0.98  | 0.58  | TRUE  | TRUE  | Mixed                                       | Fudandata |
| T493 | 0.40  | 1.00 | -1.11 | -0.53 | FALSE | FALSE | Mixed                                       | Fudandata |
| T497 | 9.23  | 1.00 | -1.36 | -1.01 | FALSE | FALSE | Mixed                                       | Fudandata |
| T513 | 41.93 | 0.00 | 0.83  | -1.99 | TRUE  | FALSE | Hypoxia <sup>low</sup> /TME <sup>high</sup> | Fudandata |
| T515 | 42.33 | 0.00 | 1.59  | -0.59 | TRUE  | FALSE | Hypoxia <sup>low</sup> /TME <sup>high</sup> | Fudandata |
| T517 | 6.90  | 1.00 | -1.27 | 1.18  | FALSE | TRUE  | Hypoxia <sup>high</sup> /TME <sup>low</sup> | Fudandata |
| T523 | 33.23 | 1.00 | -0.86 | 0.60  | FALSE | TRUE  | Hypoxia <sup>high</sup> /TME <sup>low</sup> | Fudandata |
| T525 | 25.10 | 1.00 | -0.94 | -0.32 | FALSE | FALSE | Mixed                                       | Fudandata |
| T527 | 16.60 | 1.00 | -0.45 | 1.67  | FALSE | TRUE  | Hypoxia <sup>high</sup> /TME <sup>low</sup> | Fudandata |
| T533 | 43.87 | 0.00 | 0.15  | -1.56 | TRUE  | FALSE | Hypoxia <sup>low</sup> /TME <sup>high</sup> | Fudandata |
| T537 | 43.80 | 0.00 | -1.55 | 2.29  | FALSE | TRUE  | Hypoxia <sup>high</sup> /TME <sup>low</sup> | Fudandata |
| T545 | 43.63 | 0.00 | -0.99 | -0.03 | FALSE | FALSE | Mixed                                       | Fudandata |
| T553 | 4.93  | 1.00 | -0.40 | -0.16 | FALSE | FALSE | Mixed                                       | Fudandata |
| T557 | 18.43 | 1.00 | -1.02 | -0.12 | FALSE | FALSE | Mixed                                       | Fudandata |
| T563 | 41.03 | 0.00 | 0.97  | -0.21 | TRUE  | FALSE | Hypoxia <sup>low</sup> /TME <sup>high</sup> | Fudandata |
| T567 | 16.27 | 1.00 | -1.27 | 1.73  | FALSE | TRUE  | Hypoxia <sup>high</sup> /TME <sup>low</sup> | Fudandata |
| T571 | 42.70 | 0.00 | -0.73 | -0.34 | FALSE | FALSE | Mixed                                       | Fudandata |
| T573 | 11.43 | 1.00 | 0.23  | 0.55  | TRUE  | TRUE  | Mixed                                       | Fudandata |
| T615 | 37.37 | 0.00 | 2.23  | 0.23  | TRUE  | TRUE  | Mixed                                       | Fudandata |
| T617 | 38.70 | 0.00 | -0.48 | 0.33  | FALSE | TRUE  | Hypoxia <sup>high</sup> /TME <sup>low</sup> | Fudandata |
| T627 | 37.17 | 0.00 | 1.20  | -0.55 | TRUE  | FALSE | Hypoxia <sup>low</sup> /TME <sup>high</sup> | Fudandata |
| T635 | 18.23 | 1.00 | -0.27 | -0.69 | FALSE | FALSE | Mixed                                       | Fudandata |
| T641 | 27.50 | 1.00 | 0.17  | 0.12  | TRUE  | TRUE  | Mixed                                       | Fudandata |
| T647 | 36.97 | 0.00 | -0.20 | -0.98 | FALSE | FALSE | Mixed                                       | Fudandata |
| T661 | 36.70 | 0.00 | 0.03  | 0.34  | TRUE  | TRUE  | Mixed                                       | Fudandata |
| T663 | 36.73 | 0.00 | -0.81 | 0.75  | FALSE | TRUE  | Hypoxia <sup>high</sup> /TME <sup>low</sup> | Fudandata |
| T665 | 10.50 | 1.00 | 0.32  | -0.09 | TRUE  | FALSE | Hypoxia <sup>low</sup> /TME <sup>high</sup> | Fudandata |
| T671 | 20.43 | 1.00 | -0.86 | 1.07  | FALSE | TRUE  | Hypoxia <sup>high</sup> /TME <sup>low</sup> | Fudandata |
| T685 | 23.07 | 1.00 | -1.65 | 0.69  | FALSE | TRUE  | Hypoxia <sup>high</sup> /TME <sup>low</sup> | Fudandata |
| T695 | 12.17 | 1.00 | -1.31 | -0.99 | FALSE | FALSE | Mixed                                       | Fudandata |
| T713 | 15.83 | 1.00 | 1.69  | 0.97  | TRUE  | TRUE  | Mixed                                       | Fudandata |
| T715 | 36.10 | 0.00 | -0.98 | 0.42  | FALSE | TRUE  | Hypoxia <sup>high</sup> /TME <sup>low</sup> | Fudandata |
| T721 | 35.47 | 0.00 | 2.16  | -0.36 | TRUE  | FALSE | Hypoxia <sup>low</sup> /TME <sup>high</sup> | Fudandata |
| T724 | 35.47 | 0.00 | 1.57  | -0.41 | TRUE  | FALSE | Hypoxia <sup>low</sup> /TME <sup>high</sup> | Fudandata |
| T727 | 35.43 | 0.00 | -0.35 | 0.23  | FALSE | TRUE  | Hypoxia <sup>high</sup> /TME <sup>low</sup> | Fudandata |
| T737 | 35.27 | 0.00 | -1.45 | 0.55  | FALSE | TRUE  | Hypoxia <sup>high</sup> /TME <sup>low</sup> | Fudandata |
| T741 | 34.37 | 0.00 | 0.35  | -3.04 | TRUE  | FALSE | Hypoxia <sup>low</sup> /TME <sup>high</sup> | Fudandata |
| T743 | 17.17 | 1.00 | -1.92 | 0.74  | FALSE | TRUE  | Hypoxia <sup>high</sup> /TME <sup>low</sup> | Fudandata |
| T745 | 36.33 | 0.00 | 1.09  | 0.27  | TRUE  | TRUE  | Mixed                                       | Fudandata |
| T755 | 34.97 | 0.00 | 0.00  | -0.43 | TRUE  | FALSE | Hypoxia <sup>low</sup> /TME <sup>high</sup> | Fudandata |
| T777 | 34.47 | 0.00 | 0.72  | -1.51 | TRUE  | FALSE | Hypoxia <sup>low</sup> /TME <sup>high</sup> | Fudandata |
| T785 | 7.37  | 1.00 | -0.80 | -0.40 | FALSE | FALSE | Mixed                                       | Fudandata |
| T813 | 12.53 | 1.00 | -0.44 | 0.21  | FALSE | TRUE  | Hypoxia <sup>high</sup> /TME <sup>low</sup> | Fudandata |
| T815 | 7.37  | 1.00 | -0.12 | 2.05  | FALSE | TRUE  | Hypoxia <sup>high</sup> /TME <sup>low</sup> | Fudandata |
| T817 | 34.00 | 0.00 | -0.54 | -0.17 | FALSE | FALSE | Mixed                                       | Fudandata |
| T823 | 33.90 | 0.00 | 1.08  | 0.14  | TRUE  | TRUE  | Mixed                                       | Fudandata |
| T851 | 16.97 | 1.00 | 0.54  | 1.62  | TRUE  | TRUE  | Mixed                                       | Fudandata |
| T857 | 33.90 | 0.00 | 1.93  | 0.11  | TRUE  | TRUE  | Mixed                                       | Fudandata |
| T861 | 34.13 | 0.00 | 1.26  | -1.70 | TRUE  | FALSE | Hypoxia <sup>low</sup> /TME <sup>high</sup> | Fudandata |
| T863 | 34.07 | 0.00 | 1.17  | 0.41  | TRUE  | TRUE  | Mixed                                       | Fudandata |
| T865 | 33.90 | 0.00 | -1.99 | -0.18 | FALSE | FALSE | Mixed                                       | Fudandata |
| T867 | 33.67 | 0.00 | 1.28  | -1.19 | TRUE  | FALSE | Hypoxia <sup>low</sup> /TME <sup>high</sup> | Fudandata |
| T873 | 33.90 | 0.00 | -0.14 | -0.02 | FALSE | FALSE | Mixed                                       | Fudandata |
| T877 | 28.20 | 1.00 | -1.17 | 1.53  | FALSE | TRUE  | Hypoxia <sup>high</sup> /TME <sup>low</sup> | Fudandata |
| T881 | 34.03 | 0.00 | 0.28  | -0.43 | TRUE  | FALSE | Hypoxia <sup>low</sup> /TME <sup>high</sup> | Fudandata |
| T883 | 33.90 | 0.00 | -0.39 | 0.21  | FALSE | TRUE  | Hypoxia <sup>high</sup> /TME <sup>low</sup> | Fudandata |
| T911 | 30.20 | 0.00 | 0.62  | -1.88 | TRUE  | FALSE | Hypoxia <sup>low</sup> /TME <sup>high</sup> | Fudandata |
| T913 | 24.13 | 1.00 | 0.38  | -0.66 | TRUE  | FALSE | Hypoxia <sup>low</sup> /TME <sup>high</sup> | Fudandata |
| T915 | 31.27 | 0.00 | 0.41  | -0.82 | TRUE  | FALSE | Hypoxia <sup>low</sup> /TME <sup>high</sup> | Fudandata |
| T917 | 31.30 | 0.00 | 0.48  | 0.88  | TRUE  | TRUE  | Mixed                                       | Fudandata |
| T921 | 31.23 | 0.00 | -0.76 | -0.60 | FALSE | FALSE | Mixed                                       | Fudandata |
| T923 | 4.17  | 1.00 | -1.80 | 0.52  | FALSE | TRUE  | Hypoxia <sup>high</sup> /TME <sup>low</sup> | Fudandata |
| T925 | 29.47 | 0.00 | -0.37 | -0.36 | FALSE | FALSE | Mixed                                       | Fudandata |
| T937 | 30.57 | 0.00 | -0.03 | -0.73 | FALSE | FALSE | Mixed                                       | Fudandata |
| T943 | 3.63  | 1.00 | -0.64 | 0.44  | FALSE | TRUE  | Hypoxia <sup>high</sup> /TME <sup>low</sup> | Fudandata |
| T951 | 18.80 | 1.00 | -1.49 | -0.20 | FALSE | FALSE | Mixed                                       | Fudandata |
| T953 | 30.07 | 0.00 | -0.34 | -0.01 | FALSE | FALSE | Mixed                                       | Fudandata |
| T955 | 30.73 | 0.00 | 1.40  | -0.60 | TRUE  | FALSE | Hypoxia <sup>low</sup> /TME <sup>high</sup> | Fudandata |

|           |        |      |       |       |       |       |                                             |           |
|-----------|--------|------|-------|-------|-------|-------|---------------------------------------------|-----------|
| T957      | 30.73  | 0.00 | -1.21 | -0.25 | FALSE | FALSE | Mixed                                       | Fudandata |
| T963      | 30.83  | 0.00 | 0.77  | 0.13  | TRUE  | TRUE  | Mixed                                       | Fudandata |
| T965      | 15.87  | 1.00 | -0.76 | 0.57  | FALSE | TRUE  | Hypoxia <sup>high</sup> /TME <sup>low</sup> | Fudandata |
| T967      | 30.03  | 0.00 | -0.91 | 0.88  | FALSE | TRUE  | Hypoxia <sup>high</sup> /TME <sup>low</sup> | Fudandata |
| T975      | 29.90  | 0.00 | 0.77  | -0.41 | TRUE  | FALSE | Hypoxia <sup>low</sup> /TME <sup>high</sup> | Fudandata |
| T977      | 29.87  | 0.00 | -0.72 | -1.51 | FALSE | FALSE | Mixed                                       | Fudandata |
| T981      | 29.90  | 0.00 | 1.45  | -0.52 | TRUE  | FALSE | Hypoxia <sup>low</sup> /TME <sup>high</sup> | Fudandata |
| T983      | 26.67  | 1.00 | -0.23 | 2.19  | FALSE | TRUE  | Hypoxia <sup>high</sup> /TME <sup>low</sup> | Fudandata |
| GSM256428 | 71.50  | 1.00 | 0.59  | -0.67 | TRUE  | FALSE | Hypoxia <sup>low</sup> /TME <sup>high</sup> | GSE10143  |
| GSM256439 | 129.67 | 0.00 | -0.33 | 0.99  | FALSE | TRUE  | Hypoxia <sup>high</sup> /TME <sup>low</sup> | GSE10143  |
| GSM256442 | 107.90 | 0.00 | -0.35 | 1.90  | FALSE | TRUE  | Hypoxia <sup>high</sup> /TME <sup>low</sup> | GSE10143  |
| GSM256445 | 94.97  | 1.00 | 0.57  | -0.53 | TRUE  | FALSE | Hypoxia <sup>low</sup> /TME <sup>high</sup> | GSE10143  |
| GSM256446 | 132.43 | 0.00 | -0.39 | 0.17  | FALSE | TRUE  | Hypoxia <sup>high</sup> /TME <sup>low</sup> | GSE10143  |
| GSM256448 | 67.30  | 1.00 | 1.14  | 0.87  | TRUE  | TRUE  | Mixed                                       | GSE10143  |
| GSM256450 | 119.40 | 0.00 | 1.43  | -0.07 | TRUE  | FALSE | Hypoxia <sup>low</sup> /TME <sup>high</sup> | GSE10143  |
| GSM256453 | 113.33 | 0.00 | -0.59 | -1.04 | FALSE | FALSE | Mixed                                       | GSE10143  |
| GSM256455 | 124.53 | 1.00 | -1.65 | -2.19 | FALSE | FALSE | Mixed                                       | GSE10143  |
| GSM256456 | 80.17  | 1.00 | -0.97 | 0.34  | FALSE | TRUE  | Hypoxia <sup>high</sup> /TME <sup>low</sup> | GSE10143  |
| GSM256468 | 106.10 | 0.00 | -1.15 | -1.19 | FALSE | FALSE | Mixed                                       | GSE10143  |
| GSM256469 | 95.30  | 1.00 | 0.43  | 0.40  | TRUE  | TRUE  | Mixed                                       | GSE10143  |
| GSM256476 | 14.60  | 0.00 | 0.74  | 0.77  | TRUE  | TRUE  | Mixed                                       | GSE10143  |
| GSM256479 | 38.00  | 1.00 | -0.10 | 0.18  | FALSE | TRUE  | Hypoxia <sup>high</sup> /TME <sup>low</sup> | GSE10143  |
| GSM256482 | 93.73  | 0.00 | 0.68  | -1.11 | TRUE  | FALSE | Hypoxia <sup>low</sup> /TME <sup>high</sup> | GSE10143  |
| GSM256490 | 13.60  | 1.00 | -1.12 | 1.29  | FALSE | TRUE  | Hypoxia <sup>high</sup> /TME <sup>low</sup> | GSE10143  |
| GSM256497 | 70.20  | 1.00 | -1.10 | -0.24 | FALSE | FALSE | Mixed                                       | GSE10143  |
| GSM256498 | 182.20 | 0.00 | 2.14  | 0.67  | TRUE  | TRUE  | Mixed                                       | GSE10143  |
| GSM256504 | 184.27 | 0.00 | 0.04  | -0.54 | TRUE  | FALSE | Hypoxia <sup>low</sup> /TME <sup>high</sup> | GSE10143  |
| GSM362958 | 28.20  | 1.00 | -0.28 | 0.37  | FALSE | TRUE  | Hypoxia <sup>high</sup> /TME <sup>low</sup> | GSE14520  |
| GSM362959 | 9.50   | 1.00 | 0.08  | 0.67  | TRUE  | TRUE  | Mixed                                       | GSE14520  |
| GSM362960 | 66.10  | 0.00 | 0.36  | -0.02 | TRUE  | FALSE | Hypoxia <sup>low</sup> /TME <sup>high</sup> | GSE14520  |
| GSM362964 | 67.40  | 0.00 | 1.40  | -0.79 | TRUE  | FALSE | Hypoxia <sup>low</sup> /TME <sup>high</sup> | GSE14520  |
| GSM362965 | 66.60  | 0.00 | 0.51  | -0.47 | TRUE  | FALSE | Hypoxia <sup>low</sup> /TME <sup>high</sup> | GSE14520  |
| GSM362966 | 66.10  | 0.00 | 0.86  | -1.34 | TRUE  | FALSE | Hypoxia <sup>low</sup> /TME <sup>high</sup> | GSE14520  |
| GSM362970 | 67.30  | 0.00 | 0.26  | -1.53 | TRUE  | FALSE | Hypoxia <sup>low</sup> /TME <sup>high</sup> | GSE14520  |
| GSM362971 | 48.10  | 1.00 | 1.76  | -0.53 | TRUE  | FALSE | Hypoxia <sup>low</sup> /TME <sup>high</sup> | GSE14520  |
| GSM362972 | 66.00  | 0.00 | 1.24  | -1.34 | TRUE  | FALSE | Hypoxia <sup>low</sup> /TME <sup>high</sup> | GSE14520  |
| GSM362976 | 67.00  | 0.00 | 1.48  | -1.45 | TRUE  | FALSE | Hypoxia <sup>low</sup> /TME <sup>high</sup> | GSE14520  |
| GSM362977 | 66.30  | 0.00 | 1.57  | -1.66 | TRUE  | FALSE | Hypoxia <sup>low</sup> /TME <sup>high</sup> | GSE14520  |
| GSM362978 | 28.80  | 1.00 | 0.32  | -0.81 | TRUE  | FALSE | Hypoxia <sup>low</sup> /TME <sup>high</sup> | GSE14520  |
| GSM362982 | 64.60  | 0.00 | -0.39 | -0.37 | FALSE | FALSE | Mixed                                       | GSE14520  |
| GSM362983 | 64.20  | 0.00 | -0.55 | -0.11 | FALSE | FALSE | Mixed                                       | GSE14520  |
| GSM362984 | 51.40  | 0.00 | 1.94  | -2.02 | TRUE  | FALSE | Hypoxia <sup>low</sup> /TME <sup>high</sup> | GSE14520  |
| GSM362986 | 64.50  | 0.00 | 0.83  | -0.40 | TRUE  | FALSE | Hypoxia <sup>low</sup> /TME <sup>high</sup> | GSE14520  |
| GSM362987 | 60.40  | 0.00 | 0.34  | -1.58 | TRUE  | FALSE | Hypoxia <sup>low</sup> /TME <sup>high</sup> | GSE14520  |
| GSM362988 | 51.10  | 0.00 | -0.50 | -0.96 | FALSE | FALSE | Mixed                                       | GSE14520  |
| GSM362992 | 64.30  | 0.00 | 0.28  | -1.08 | TRUE  | FALSE | Hypoxia <sup>low</sup> /TME <sup>high</sup> | GSE14520  |
| GSM362993 | 3.80   | 0.00 | -0.71 | -0.54 | FALSE | FALSE | Mixed                                       | GSE14520  |
| GSM362994 | 54.80  | 0.00 | 0.48  | -1.73 | TRUE  | FALSE | Hypoxia <sup>low</sup> /TME <sup>high</sup> | GSE14520  |
| GSM363008 | 58.40  | 0.00 | 1.03  | 0.48  | TRUE  | TRUE  | Mixed                                       | GSE14520  |
| GSM363009 | 58.90  | 0.00 | -0.95 | 1.45  | FALSE | TRUE  | Hypoxia <sup>high</sup> /TME <sup>low</sup> | GSE14520  |
| GSM363010 | 62.00  | 0.00 | 0.60  | 1.79  | TRUE  | TRUE  | Mixed                                       | GSE14520  |
| GSM363011 | 17.60  | 1.00 | -1.50 | 1.21  | FALSE | TRUE  | Hypoxia <sup>high</sup> /TME <sup>low</sup> | GSE14520  |
| GSM363012 | 4.50   | 1.00 | 0.94  | -0.61 | TRUE  | FALSE | Hypoxia <sup>low</sup> /TME <sup>high</sup> | GSE14520  |
| GSM363013 | 7.70   | 1.00 | 0.41  | 1.35  | TRUE  | TRUE  | Mixed                                       | GSE14520  |
| GSM363014 | 60.70  | 0.00 | 0.59  | -0.50 | TRUE  | FALSE | Hypoxia <sup>low</sup> /TME <sup>high</sup> | GSE14520  |
| GSM363015 | 59.70  | 0.00 | -0.37 | 0.40  | FALSE | TRUE  | Hypoxia <sup>high</sup> /TME <sup>low</sup> | GSE14520  |
| GSM363016 | 2.00   | 0.00 | 0.55  | -1.09 | TRUE  | FALSE | Hypoxia <sup>low</sup> /TME <sup>high</sup> | GSE14520  |
| GSM363017 | 12.70  | 1.00 | -0.97 | 0.93  | FALSE | TRUE  | Hypoxia <sup>high</sup> /TME <sup>low</sup> | GSE14520  |
| GSM363029 | 51.30  | 0.00 | 1.41  | 0.51  | TRUE  | TRUE  | Mixed                                       | GSE14520  |
| GSM363030 | 4.50   | 1.00 | -1.55 | 2.01  | FALSE | TRUE  | Hypoxia <sup>high</sup> /TME <sup>low</sup> | GSE14520  |
| GSM363031 | 52.80  | 0.00 | 0.05  | -0.34 | TRUE  | FALSE | Hypoxia <sup>low</sup> /TME <sup>high</sup> | GSE14520  |
| GSM363032 | 24.90  | 0.00 | -0.18 | 1.60  | FALSE | TRUE  | Hypoxia <sup>high</sup> /TME <sup>low</sup> | GSE14520  |
| GSM363033 | 36.40  | 1.00 | 0.02  | 0.22  | TRUE  | TRUE  | Mixed                                       | GSE14520  |
| GSM363034 | 45.90  | 1.00 | 0.32  | 0.45  | TRUE  | TRUE  | Mixed                                       | GSE14520  |
| GSM363035 | 56.10  | 0.00 | 2.09  | -0.48 | TRUE  | FALSE | Hypoxia <sup>low</sup> /TME <sup>high</sup> | GSE14520  |
| GSM363036 | 32.70  | 1.00 | -0.02 | -0.23 | FALSE | FALSE | Mixed                                       | GSE14520  |
| GSM363037 | 61.20  | 0.00 | -0.53 | 0.66  | FALSE | TRUE  | Hypoxia <sup>high</sup> /TME <sup>low</sup> | GSE14520  |
| GSM363038 | 15.10  | 1.00 | -0.34 | 0.85  | FALSE | TRUE  | Hypoxia <sup>high</sup> /TME <sup>low</sup> | GSE14520  |
| GSM363039 | 52.80  | 0.00 | 0.71  | -0.90 | TRUE  | FALSE | Hypoxia <sup>low</sup> /TME <sup>high</sup> | GSE14520  |
| GSM363048 | 20.30  | 1.00 | -0.62 | 1.05  | FALSE | TRUE  | Hypoxia <sup>high</sup> /TME <sup>low</sup> | GSE14520  |
| GSM363049 | 62.40  | 0.00 | -0.28 | -0.16 | FALSE | FALSE | Mixed                                       | GSE14520  |
| GSM363050 | 54.20  | 0.00 | -0.05 | -0.19 | FALSE | FALSE | Mixed                                       | GSE14520  |
| GSM363051 | 20.60  | 0.00 | 1.09  | 1.30  | TRUE  | TRUE  | Mixed                                       | GSE14520  |
| GSM363052 | 14.30  | 1.00 | -0.86 | 3.45  | FALSE | TRUE  | Hypoxia <sup>high</sup> /TME <sup>low</sup> | GSE14520  |
| GSM363053 | 57.00  | 0.00 | -0.21 | -0.52 | FALSE | FALSE | Mixed                                       | GSE14520  |
| GSM363054 | 53.80  | 0.00 | -0.96 | 0.28  | FALSE | TRUE  | Hypoxia <sup>high</sup> /TME <sup>low</sup> | GSE14520  |
| GSM363055 | 7.30   | 0.00 | -0.18 | 1.07  | FALSE | TRUE  | Hypoxia <sup>high</sup> /TME <sup>low</sup> | GSE14520  |
| GSM363056 | 19.20  | 1.00 | -0.83 | 1.21  | FALSE | TRUE  | Hypoxia <sup>high</sup> /TME <sup>low</sup> | GSE14520  |



|           |       |      |       |       |       |       |                                             |          |
|-----------|-------|------|-------|-------|-------|-------|---------------------------------------------|----------|
| GSM363057 | 60.50 | 1.00 | -0.51 | 0.54  | FALSE | TRUE  | Hypoxia <sup>high</sup> /TME <sup>low</sup> | GSE14520 |
| GSM363069 | 13.60 | 1.00 | -1.34 | 0.87  | FALSE | TRUE  | Hypoxia <sup>high</sup> /TME <sup>low</sup> | GSE14520 |
| GSM363070 | 57.00 | 0.00 | -1.48 | 2.39  | FALSE | TRUE  | Hypoxia <sup>high</sup> /TME <sup>low</sup> | GSE14520 |
| GSM363071 | 13.80 | 1.00 | -0.44 | 1.65  | FALSE | TRUE  | Hypoxia <sup>high</sup> /TME <sup>low</sup> | GSE14520 |
| GSM363072 | 10.40 | 0.00 | 1.58  | -1.20 | TRUE  | FALSE | Hypoxia <sup>low</sup> /TME <sup>high</sup> | GSE14520 |
| GSM363073 | 26.50 | 1.00 | 1.14  | 1.35  | TRUE  | TRUE  | Mixed                                       | GSE14520 |
| GSM363074 | 57.70 | 0.00 | 0.96  | 0.44  | TRUE  | TRUE  | Mixed                                       | GSE14520 |
| GSM363075 | 18.00 | 1.00 | -0.20 | 0.05  | FALSE | TRUE  | Hypoxia <sup>high</sup> /TME <sup>low</sup> | GSE14520 |
| GSM363076 | 23.00 | 1.00 | 0.80  | 0.25  | TRUE  | TRUE  | Mixed                                       | GSE14520 |
| GSM363077 | 52.70 | 0.00 | 0.02  | -0.21 | TRUE  | FALSE | Hypoxia <sup>low</sup> /TME <sup>high</sup> | GSE14520 |
| GSM363078 | 57.90 | 1.00 | 0.22  | 0.00  | TRUE  | FALSE | Hypoxia <sup>low</sup> /TME <sup>high</sup> | GSE14520 |
| GSM363079 | 7.80  | 1.00 | -1.30 | 0.37  | FALSE | TRUE  | Hypoxia <sup>high</sup> /TME <sup>low</sup> | GSE14520 |
| GSM363080 | 2.30  | 1.00 | -0.87 | 1.79  | FALSE | TRUE  | Hypoxia <sup>high</sup> /TME <sup>low</sup> | GSE14520 |
| GSM363081 | 5.20  | 1.00 | -1.18 | 0.70  | FALSE | TRUE  | Hypoxia <sup>high</sup> /TME <sup>low</sup> | GSE14520 |
| GSM363082 | 57.00 | 0.00 | 0.62  | -1.39 | TRUE  | FALSE | Hypoxia <sup>low</sup> /TME <sup>high</sup> | GSE14520 |
| GSM363083 | 53.30 | 0.00 | -1.27 | 1.13  | FALSE | TRUE  | Hypoxia <sup>high</sup> /TME <sup>low</sup> | GSE14520 |
| GSM363084 | 62.60 | 0.00 | 0.28  | -0.10 | TRUE  | FALSE | Hypoxia <sup>low</sup> /TME <sup>high</sup> | GSE14520 |
| GSM363085 | 54.80 | 1.00 | -1.47 | 0.85  | FALSE | TRUE  | Hypoxia <sup>high</sup> /TME <sup>low</sup> | GSE14520 |
| GSM363086 | 60.50 | 0.00 | -0.62 | -0.18 | FALSE | FALSE | Mixed                                       | GSE14520 |
| GSM363087 | 54.00 | 0.00 | 0.85  | -0.72 | TRUE  | FALSE | Hypoxia <sup>low</sup> /TME <sup>high</sup> | GSE14520 |
| GSM363098 | 56.90 | 0.00 | 1.47  | 0.71  | TRUE  | TRUE  | Mixed                                       | GSE14520 |
| GSM363099 | 30.90 | 1.00 | 0.05  | 3.18  | TRUE  | TRUE  | Mixed                                       | GSE14520 |
| GSM363100 | 3.40  | 1.00 | -2.43 | 0.86  | FALSE | TRUE  | Hypoxia <sup>high</sup> /TME <sup>low</sup> | GSE14520 |
| GSM363101 | 56.30 | 0.00 | -0.13 | -0.35 | FALSE | FALSE | Mixed                                       | GSE14520 |
| GSM363102 | 37.90 | 1.00 | 0.43  | -0.19 | TRUE  | FALSE | Hypoxia <sup>low</sup> /TME <sup>high</sup> | GSE14520 |
| GSM363104 | 35.90 | 1.00 | 0.99  | -1.23 | TRUE  | FALSE | Hypoxia <sup>low</sup> /TME <sup>high</sup> | GSE14520 |
| GSM363105 | 9.50  | 0.00 | -0.95 | 0.13  | FALSE | TRUE  | Hypoxia <sup>high</sup> /TME <sup>low</sup> | GSE14520 |
| GSM363106 | 14.60 | 1.00 | -0.42 | 0.15  | FALSE | TRUE  | Hypoxia <sup>high</sup> /TME <sup>low</sup> | GSE14520 |
| GSM363107 | 7.00  | 1.00 | 0.35  | -0.79 | TRUE  | FALSE | Hypoxia <sup>low</sup> /TME <sup>high</sup> | GSE14520 |
| GSM363108 | 48.80 | 0.00 | 1.00  | -0.89 | TRUE  | FALSE | Hypoxia <sup>low</sup> /TME <sup>high</sup> | GSE14520 |
| GSM363109 | 55.20 | 0.00 | -0.74 | 0.15  | FALSE | TRUE  | Hypoxia <sup>high</sup> /TME <sup>low</sup> | GSE14520 |
| GSM363115 | 66.60 | 0.00 | 1.15  | -0.56 | TRUE  | FALSE | Hypoxia <sup>low</sup> /TME <sup>high</sup> | GSE14520 |
| GSM363121 | 51.20 | 0.00 | 1.92  | 0.25  | TRUE  | TRUE  | Mixed                                       | GSE14520 |
| GSM363122 | 55.40 | 0.00 | 0.56  | 0.08  | TRUE  | TRUE  | Mixed                                       | GSE14520 |
| GSM363123 | 42.70 | 0.00 | 0.16  | -0.15 | TRUE  | FALSE | Hypoxia <sup>low</sup> /TME <sup>high</sup> | GSE14520 |
| GSM363124 | 53.50 | 0.00 | 1.10  | -1.57 | TRUE  | FALSE | Hypoxia <sup>low</sup> /TME <sup>high</sup> | GSE14520 |
| GSM363125 | 16.50 | 1.00 | 0.23  | 0.31  | TRUE  | TRUE  | Mixed                                       | GSE14520 |
| GSM363126 | 59.50 | 0.00 | 0.33  | -0.24 | TRUE  | FALSE | Hypoxia <sup>low</sup> /TME <sup>high</sup> | GSE14520 |
| GSM363127 | 22.20 | 1.00 | -1.43 | 1.77  | FALSE | TRUE  | Hypoxia <sup>high</sup> /TME <sup>low</sup> | GSE14520 |
| GSM363128 | 30.10 | 1.00 | -0.34 | 1.22  | FALSE | TRUE  | Hypoxia <sup>high</sup> /TME <sup>low</sup> | GSE14520 |
| GSM363129 | 3.50  | 1.00 | -2.26 | 2.27  | FALSE | TRUE  | Hypoxia <sup>high</sup> /TME <sup>low</sup> | GSE14520 |
| GSM363130 | 61.80 | 0.00 | -0.31 | -1.44 | FALSE | FALSE | Mixed                                       | GSE14520 |
| GSM363142 | 46.10 | 1.00 | 0.46  | 0.53  | TRUE  | TRUE  | Mixed                                       | GSE14520 |
| GSM363143 | 32.60 | 1.00 | 1.68  | 1.45  | TRUE  | TRUE  | Mixed                                       | GSE14520 |
| GSM363144 | 51.10 | 0.00 | 0.24  | 0.22  | TRUE  | TRUE  | Mixed                                       | GSE14520 |
| GSM363145 | 33.00 | 1.00 | -0.21 | 0.53  | FALSE | TRUE  | Hypoxia <sup>high</sup> /TME <sup>low</sup> | GSE14520 |
| GSM363146 | 54.90 | 0.00 | 1.27  | -0.31 | TRUE  | FALSE | Hypoxia <sup>low</sup> /TME <sup>high</sup> | GSE14520 |
| GSM363147 | 28.70 | 1.00 | -0.47 | 0.70  | FALSE | TRUE  | Hypoxia <sup>high</sup> /TME <sup>low</sup> | GSE14520 |
| GSM363148 | 52.40 | 0.00 | 0.83  | -0.43 | TRUE  | FALSE | Hypoxia <sup>low</sup> /TME <sup>high</sup> | GSE14520 |
| GSM363149 | 14.40 | 0.00 | -0.26 | -0.86 | FALSE | FALSE | Mixed                                       | GSE14520 |
| GSM363150 | 3.30  | 1.00 | -2.44 | 1.99  | FALSE | TRUE  | Hypoxia <sup>high</sup> /TME <sup>low</sup> | GSE14520 |
| GSM363151 | 67.10 | 0.00 | -0.31 | 0.27  | FALSE | TRUE  | Hypoxia <sup>high</sup> /TME <sup>low</sup> | GSE14520 |
| GSM363152 | 8.30  | 1.00 | -0.73 | -0.68 | FALSE | FALSE | Mixed                                       | GSE14520 |
| GSM363164 | 55.20 | 0.00 | -0.13 | -1.04 | FALSE | FALSE | Mixed                                       | GSE14520 |
| GSM363166 | 53.80 | 0.00 | -0.82 | -1.55 | FALSE | FALSE | Mixed                                       | GSE14520 |
| GSM363168 | 53.80 | 0.00 | -0.13 | -1.07 | FALSE | FALSE | Mixed                                       | GSE14520 |
| GSM363169 | 39.40 | 0.00 | -0.77 | 1.39  | FALSE | TRUE  | Hypoxia <sup>high</sup> /TME <sup>low</sup> | GSE14520 |
| GSM363170 | 53.30 | 0.00 | -0.42 | 0.46  | FALSE | TRUE  | Hypoxia <sup>high</sup> /TME <sup>low</sup> | GSE14520 |
| GSM363172 | 6.70  | 1.00 | -0.90 | 0.43  | FALSE | TRUE  | Hypoxia <sup>high</sup> /TME <sup>low</sup> | GSE14520 |
| GSM363174 | 67.10 | 0.00 | 0.85  | -0.15 | TRUE  | FALSE | Hypoxia <sup>low</sup> /TME <sup>high</sup> | GSE14520 |
| GSM363176 | 50.70 | 0.00 | 1.25  | -0.85 | TRUE  | FALSE | Hypoxia <sup>low</sup> /TME <sup>high</sup> | GSE14520 |
| GSM363178 | 57.30 | 0.00 | -0.17 | -1.07 | FALSE | FALSE | Mixed                                       | GSE14520 |
| GSM363180 | 47.10 | 1.00 | 0.77  | -0.54 | TRUE  | FALSE | Hypoxia <sup>low</sup> /TME <sup>high</sup> | GSE14520 |
| GSM363182 | 52.70 | 0.00 | -0.53 | -0.47 | FALSE | FALSE | Mixed                                       | GSE14520 |
| GSM363184 | 16.30 | 0.00 | -2.22 | 2.91  | FALSE | TRUE  | Hypoxia <sup>high</sup> /TME <sup>low</sup> | GSE14520 |
| GSM363186 | 7.60  | 1.00 | 0.84  | -1.47 | TRUE  | FALSE | Hypoxia <sup>low</sup> /TME <sup>high</sup> | GSE14520 |
| GSM363188 | 57.30 | 0.00 | 0.38  | -0.92 | TRUE  | FALSE | Hypoxia <sup>low</sup> /TME <sup>high</sup> | GSE14520 |
| GSM363190 | 4.80  | 0.00 | -1.00 | -0.08 | FALSE | FALSE | Mixed                                       | GSE14520 |
| GSM363192 | 52.20 | 0.00 | -0.44 | 0.43  | FALSE | TRUE  | Hypoxia <sup>high</sup> /TME <sup>low</sup> | GSE14520 |
| GSM363194 | 4.50  | 0.00 | -1.44 | 2.00  | FALSE | TRUE  | Hypoxia <sup>high</sup> /TME <sup>low</sup> | GSE14520 |
| GSM363196 | 57.70 | 0.00 | 2.34  | -0.49 | TRUE  | FALSE | Hypoxia <sup>low</sup> /TME <sup>high</sup> | GSE14520 |
| GSM363198 | 57.90 | 0.00 | -0.16 | -0.96 | FALSE | FALSE | Mixed                                       | GSE14520 |
| GSM363200 | 23.90 | 1.00 | -0.01 | -1.04 | FALSE | FALSE | Mixed                                       | GSE14520 |
| GSM363202 | 60.00 | 0.00 | -0.04 | -0.98 | FALSE | FALSE | Mixed                                       | GSE14520 |
| GSM363204 | 14.10 | 1.00 | -1.16 | -0.17 | FALSE | FALSE | Mixed                                       | GSE14520 |
| GSM363205 | 58.00 | 0.00 | 0.56  | -1.21 | TRUE  | FALSE | Hypoxia <sup>low</sup> /TME <sup>high</sup> | GSE14520 |
| GSM363207 | 53.30 | 1.00 | -1.06 | 0.75  | FALSE | TRUE  | Hypoxia <sup>high</sup> /TME <sup>low</sup> | GSE14520 |
| GSM363209 | 60.80 | 0.00 | 0.58  | -0.59 | TRUE  | FALSE | Hypoxia <sup>low</sup> /TME <sup>high</sup> | GSE14520 |

|           |       |      |       |       |       |       |                                             |          |
|-----------|-------|------|-------|-------|-------|-------|---------------------------------------------|----------|
| GSM363211 | 8.90  | 1.00 | -1.12 | 0.56  | FALSE | TRUE  | Hypoxia <sup>high</sup> /TME <sup>low</sup> | GSE14520 |
| GSM363213 | 57.60 | 0.00 | 0.31  | -0.75 | TRUE  | FALSE | Hypoxia <sup>low</sup> /TME <sup>high</sup> | GSE14520 |
| GSM363215 | 18.60 | 0.00 | -0.32 | -0.39 | FALSE | FALSE | Mixed                                       | GSE14520 |
| GSM363217 | 54.50 | 0.00 | -1.81 | 0.23  | FALSE | TRUE  | Hypoxia <sup>high</sup> /TME <sup>low</sup> | GSE14520 |
| GSM363218 | 15.20 | 1.00 | -1.91 | 0.93  | FALSE | TRUE  | Hypoxia <sup>high</sup> /TME <sup>low</sup> | GSE14520 |
| GSM363220 | 54.20 | 0.00 | 0.55  | 0.06  | TRUE  | TRUE  | Mixed                                       | GSE14520 |
| GSM363222 | 48.40 | 0.00 | -1.18 | 0.60  | FALSE | TRUE  | Hypoxia <sup>high</sup> /TME <sup>low</sup> | GSE14520 |
| GSM363224 | 57.90 | 0.00 | -0.09 | -0.29 | FALSE | FALSE | Mixed                                       | GSE14520 |
| GSM363226 | 60.40 | 0.00 | 0.74  | -0.80 | TRUE  | FALSE | Hypoxia <sup>low</sup> /TME <sup>high</sup> | GSE14520 |
| GSM363230 | 4.80  | 0.00 | -0.52 | -0.68 | FALSE | FALSE | Mixed                                       | GSE14520 |
| GSM363232 | 57.90 | 0.00 | 0.58  | -0.42 | TRUE  | FALSE | Hypoxia <sup>low</sup> /TME <sup>high</sup> | GSE14520 |
| GSM363235 | 32.80 | 0.00 | -1.07 | 1.52  | FALSE | TRUE  | Hypoxia <sup>high</sup> /TME <sup>low</sup> | GSE14520 |
| GSM363237 | 57.50 | 0.00 | -0.20 | 0.91  | FALSE | TRUE  | Hypoxia <sup>high</sup> /TME <sup>low</sup> | GSE14520 |
| GSM363239 | 42.20 | 1.00 | -0.24 | -0.75 | FALSE | FALSE | Mixed                                       | GSE14520 |
| GSM363241 | 54.20 | 0.00 | 1.22  | -0.82 | TRUE  | FALSE | Hypoxia <sup>low</sup> /TME <sup>high</sup> | GSE14520 |
| GSM363243 | 55.80 | 0.00 | 1.93  | -1.48 | TRUE  | FALSE | Hypoxia <sup>low</sup> /TME <sup>high</sup> | GSE14520 |
| GSM363245 | 57.50 | 0.00 | -0.85 | 1.04  | FALSE | TRUE  | Hypoxia <sup>high</sup> /TME <sup>low</sup> | GSE14520 |
| GSM363247 | 52.90 | 0.00 | 0.42  | -0.91 | TRUE  | FALSE | Hypoxia <sup>low</sup> /TME <sup>high</sup> | GSE14520 |
| GSM363249 | 59.20 | 0.00 | -0.71 | -0.25 | FALSE | FALSE | Mixed                                       | GSE14520 |
| GSM363251 | 19.60 | 1.00 | -0.78 | 0.12  | FALSE | TRUE  | Hypoxia <sup>high</sup> /TME <sup>low</sup> | GSE14520 |
| GSM363263 | 3.00  | 1.00 | -1.47 | 1.06  | FALSE | TRUE  | Hypoxia <sup>high</sup> /TME <sup>low</sup> | GSE14520 |
| GSM363264 | 17.80 | 1.00 | 0.63  | -0.88 | TRUE  | FALSE | Hypoxia <sup>low</sup> /TME <sup>high</sup> | GSE14520 |
| GSM363265 | 65.10 | 0.00 | 0.63  | 0.24  | TRUE  | TRUE  | Mixed                                       | GSE14520 |
| GSM363266 | 2.50  | 1.00 | -0.09 | 0.38  | FALSE | TRUE  | Hypoxia <sup>high</sup> /TME <sup>low</sup> | GSE14520 |
| GSM363267 | 47.90 | 1.00 | 1.79  | -0.62 | TRUE  | FALSE | Hypoxia <sup>low</sup> /TME <sup>high</sup> | GSE14520 |
| GSM363268 | 56.00 | 0.00 | 0.22  | 0.26  | TRUE  | TRUE  | Mixed                                       | GSE14520 |
| GSM363269 | 52.70 | 1.00 | 0.37  | -1.51 | TRUE  | FALSE | Hypoxia <sup>low</sup> /TME <sup>high</sup> | GSE14520 |
| GSM363270 | 21.30 | 1.00 | -0.76 | 0.16  | FALSE | TRUE  | Hypoxia <sup>high</sup> /TME <sup>low</sup> | GSE14520 |
| GSM363271 | 28.70 | 0.00 | -0.61 | 1.56  | FALSE | TRUE  | Hypoxia <sup>high</sup> /TME <sup>low</sup> | GSE14520 |
| GSM363272 | 56.30 | 0.00 | 0.80  | -0.59 | TRUE  | FALSE | Hypoxia <sup>low</sup> /TME <sup>high</sup> | GSE14520 |
| GSM363273 | 58.00 | 0.00 | 0.88  | -1.22 | TRUE  | FALSE | Hypoxia <sup>low</sup> /TME <sup>high</sup> | GSE14520 |
| GSM363274 | 26.90 | 1.00 | -1.39 | -1.01 | FALSE | FALSE | Mixed                                       | GSE14520 |
| GSM363275 | 59.80 | 0.00 | 2.00  | -0.58 | TRUE  | FALSE | Hypoxia <sup>low</sup> /TME <sup>high</sup> | GSE14520 |
| GSM363288 | 60.30 | 0.00 | 0.49  | -0.72 | TRUE  | FALSE | Hypoxia <sup>low</sup> /TME <sup>high</sup> | GSE14520 |
| GSM363289 | 54.20 | 0.00 | 0.01  | -0.48 | TRUE  | FALSE | Hypoxia <sup>low</sup> /TME <sup>high</sup> | GSE14520 |
| GSM363290 | 54.70 | 0.00 | 0.49  | -0.32 | TRUE  | FALSE | Hypoxia <sup>low</sup> /TME <sup>high</sup> | GSE14520 |
| GSM363291 | 50.10 | 1.00 | 1.16  | -0.33 | TRUE  | FALSE | Hypoxia <sup>low</sup> /TME <sup>high</sup> | GSE14520 |
| GSM363292 | 59.90 | 0.00 | -0.19 | -0.17 | FALSE | FALSE | Mixed                                       | GSE14520 |
| GSM363293 | 61.50 | 0.00 | 0.66  | -0.60 | TRUE  | FALSE | Hypoxia <sup>low</sup> /TME <sup>high</sup> | GSE14520 |
| GSM363294 | 62.60 | 0.00 | -0.52 | 0.06  | FALSE | TRUE  | Hypoxia <sup>high</sup> /TME <sup>low</sup> | GSE14520 |
| GSM363295 | 54.90 | 0.00 | 1.15  | -1.36 | TRUE  | FALSE | Hypoxia <sup>low</sup> /TME <sup>high</sup> | GSE14520 |
| GSM363296 | 27.50 | 1.00 | -1.22 | 0.48  | FALSE | TRUE  | Hypoxia <sup>high</sup> /TME <sup>low</sup> | GSE14520 |
| GSM363297 | 3.00  | 0.00 | -0.03 | 1.00  | FALSE | TRUE  | Hypoxia <sup>high</sup> /TME <sup>low</sup> | GSE14520 |
| GSM363298 | 53.60 | 0.00 | 0.41  | -0.22 | TRUE  | FALSE | Hypoxia <sup>low</sup> /TME <sup>high</sup> | GSE14520 |
| GSM363309 | 53.00 | 1.00 | -0.76 | -0.42 | FALSE | FALSE | Mixed                                       | GSE14520 |
| GSM363310 | 23.50 | 1.00 | -0.55 | -0.09 | FALSE | FALSE | Mixed                                       | GSE14520 |
| GSM363311 | 19.00 | 0.00 | -0.45 | -0.15 | FALSE | FALSE | Mixed                                       | GSE14520 |
| GSM363312 | 55.30 | 0.00 | 0.81  | -1.00 | TRUE  | FALSE | Hypoxia <sup>low</sup> /TME <sup>high</sup> | GSE14520 |
| GSM363313 | 36.60 | 0.00 | 0.48  | -0.75 | TRUE  | FALSE | Hypoxia <sup>low</sup> /TME <sup>high</sup> | GSE14520 |
| GSM363314 | 57.10 | 0.00 | 0.61  | -0.38 | TRUE  | FALSE | Hypoxia <sup>low</sup> /TME <sup>high</sup> | GSE14520 |
| GSM363315 | 65.40 | 0.00 | -0.12 | -0.87 | FALSE | FALSE | Mixed                                       | GSE14520 |
| GSM363316 | 54.70 | 0.00 | -1.20 | 0.00  | FALSE | TRUE  | Hypoxia <sup>high</sup> /TME <sup>low</sup> | GSE14520 |
| GSM363317 | 62.80 | 0.00 | -0.79 | 0.90  | FALSE | TRUE  | Hypoxia <sup>high</sup> /TME <sup>low</sup> | GSE14520 |
| GSM363326 | 37.20 | 1.00 | 0.96  | 0.55  | TRUE  | TRUE  | Mixed                                       | GSE14520 |
| GSM363327 | 60.10 | 0.00 | 1.07  | -0.94 | TRUE  | FALSE | Hypoxia <sup>low</sup> /TME <sup>high</sup> | GSE14520 |
| GSM363328 | 12.00 | 1.00 | -0.34 | 2.20  | FALSE | TRUE  | Hypoxia <sup>high</sup> /TME <sup>low</sup> | GSE14520 |
| GSM363329 | 53.20 | 0.00 | -0.04 | 0.13  | FALSE | TRUE  | Hypoxia <sup>high</sup> /TME <sup>low</sup> | GSE14520 |
| GSM363330 | 12.60 | 1.00 | -1.65 | 1.81  | FALSE | TRUE  | Hypoxia <sup>high</sup> /TME <sup>low</sup> | GSE14520 |
| GSM363331 | 36.50 | 1.00 | 1.18  | 0.25  | TRUE  | TRUE  | Mixed                                       | GSE14520 |
| GSM363332 | 12.60 | 1.00 | -1.80 | 0.14  | FALSE | TRUE  | Hypoxia <sup>high</sup> /TME <sup>low</sup> | GSE14520 |
| GSM363333 | 13.50 | 1.00 | -0.93 | 1.01  | FALSE | TRUE  | Hypoxia <sup>high</sup> /TME <sup>low</sup> | GSE14520 |
| GSM363335 | 59.40 | 0.00 | 0.91  | -1.06 | TRUE  | FALSE | Hypoxia <sup>low</sup> /TME <sup>high</sup> | GSE14520 |
| GSM363336 | 8.00  | 1.00 | 0.70  | -1.04 | TRUE  | FALSE | Hypoxia <sup>low</sup> /TME <sup>high</sup> | GSE14520 |
| GSM363337 | 65.50 | 0.00 | -0.80 | 0.09  | FALSE | TRUE  | Hypoxia <sup>high</sup> /TME <sup>low</sup> | GSE14520 |
| GSM363339 | 65.40 | 0.00 | -0.55 | 0.84  | FALSE | TRUE  | Hypoxia <sup>high</sup> /TME <sup>low</sup> | GSE14520 |
| GSM363341 | 65.40 | 0.00 | -0.32 | -0.39 | FALSE | FALSE | Mixed                                       | GSE14520 |
| GSM363343 | 65.10 | 0.00 | 1.15  | -0.54 | TRUE  | FALSE | Hypoxia <sup>low</sup> /TME <sup>high</sup> | GSE14520 |
| GSM363344 | 38.70 | 0.00 | -0.07 | -0.85 | FALSE | FALSE | Mixed                                       | GSE14520 |
| GSM363346 | 14.30 | 1.00 | -0.99 | -0.44 | FALSE | FALSE | Mixed                                       | GSE14520 |
| GSM363348 | 14.30 | 0.00 | -2.06 | 1.19  | FALSE | TRUE  | Hypoxia <sup>high</sup> /TME <sup>low</sup> | GSE14520 |
| GSM363350 | 62.90 | 0.00 | -2.26 | 1.09  | FALSE | TRUE  | Hypoxia <sup>high</sup> /TME <sup>low</sup> | GSE14520 |
| GSM363352 | 16.20 | 1.00 | 1.37  | 0.35  | TRUE  | TRUE  | Mixed                                       | GSE14520 |
| GSM363354 | 10.40 | 1.00 | -3.13 | 1.60  | FALSE | TRUE  | Hypoxia <sup>high</sup> /TME <sup>low</sup> | GSE14520 |
| GSM363355 | 9.10  | 1.00 | -0.71 | 0.23  | FALSE | TRUE  | Hypoxia <sup>high</sup> /TME <sup>low</sup> | GSE14520 |
| GSM363357 | 8.80  | 1.00 | -0.66 | 0.52  | FALSE | TRUE  | Hypoxia <sup>high</sup> /TME <sup>low</sup> | GSE14520 |
| GSM363358 | 53.90 | 0.00 | -0.04 | -0.63 | FALSE | FALSE | Mixed                                       | GSE14520 |
| GSM363360 | 53.30 | 0.00 | -0.84 | -0.27 | FALSE | FALSE | Mixed                                       | GSE14520 |
| GSM363362 | 5.80  | 1.00 | -0.31 | -0.03 | FALSE | FALSE | Mixed                                       | GSE14520 |

|                  |       |      |       |       |       |       |                                             |              |
|------------------|-------|------|-------|-------|-------|-------|---------------------------------------------|--------------|
| GSM363364        | 27.10 | 1.00 | 1.80  | -1.80 | TRUE  | FALSE | Hypoxia <sup>low</sup> /TME <sup>high</sup> | GSE14520     |
| GSM363366        | 52.30 | 0.00 | 0.82  | -1.91 | TRUE  | FALSE | Hypoxia <sup>low</sup> /TME <sup>high</sup> | GSE14520     |
| GSM363368        | 15.40 | 1.00 | 0.28  | -0.10 | TRUE  | FALSE | Hypoxia <sup>low</sup> /TME <sup>high</sup> | GSE14520     |
| GSM363371        | 66.30 | 0.00 | 0.74  | -1.00 | TRUE  | FALSE | Hypoxia <sup>low</sup> /TME <sup>high</sup> | GSE14520     |
| GSM363376        | 61.50 | 0.00 | 0.73  | -0.69 | TRUE  | FALSE | Hypoxia <sup>low</sup> /TME <sup>high</sup> | GSE14520     |
| GSM363378        | 31.90 | 1.00 | 1.17  | -0.68 | TRUE  | FALSE | Hypoxia <sup>low</sup> /TME <sup>high</sup> | GSE14520     |
| GSM363384        | 51.60 | 1.00 | -0.47 | 0.82  | FALSE | TRUE  | Hypoxia <sup>high</sup> /TME <sup>low</sup> | GSE14520     |
| GSM363386        | 10.00 | 1.00 | -0.55 | 1.41  | FALSE | TRUE  | Hypoxia <sup>high</sup> /TME <sup>low</sup> | GSE14520     |
| GSM363388        | 57.30 | 0.00 | 2.99  | -0.15 | TRUE  | FALSE | Hypoxia <sup>low</sup> /TME <sup>high</sup> | GSE14520     |
| GSM363391        | 57.30 | 0.00 | 0.15  | -0.55 | TRUE  | FALSE | Hypoxia <sup>low</sup> /TME <sup>high</sup> | GSE14520     |
| GSM363393        | 4.00  | 1.00 | 0.46  | -0.85 | TRUE  | FALSE | Hypoxia <sup>low</sup> /TME <sup>high</sup> | GSE14520     |
| GSM363400        | 55.60 | 0.00 | -0.18 | -0.59 | FALSE | FALSE | Mixed                                       | GSE14520     |
| GSM363404        | 12.00 | 1.00 | 0.83  | -0.09 | TRUE  | FALSE | Hypoxia <sup>low</sup> /TME <sup>high</sup> | GSE14520     |
| GSM712542        | 7.50  | 1.00 | -0.48 | 1.16  | FALSE | TRUE  | Hypoxia <sup>high</sup> /TME <sup>low</sup> | GSE14520     |
| HCCDB.18.S10     | 19.00 | 0.00 | -1.68 | 0.08  | FALSE | TRUE  | Hypoxia <sup>high</sup> /TME <sup>low</sup> | ICGC_LIRI_JP |
| HCCDB.18.S100    | 15.00 | 0.00 | 0.50  | -1.35 | TRUE  | FALSE | Hypoxia <sup>low</sup> /TME <sup>high</sup> | ICGC_LIRI_JP |
| HCCDB.18.S102    | 56.00 | 0.00 | 0.32  | -0.03 | TRUE  | FALSE | Hypoxia <sup>low</sup> /TME <sup>high</sup> | ICGC_LIRI_JP |
| HCCDB.18.S104    | 39.00 | 0.00 | -0.23 | -0.95 | FALSE | FALSE | Mixed                                       | ICGC_LIRI_JP |
| HCCDB.18.S105    | 42.00 | 0.00 | 1.01  | -0.42 | TRUE  | FALSE | Hypoxia <sup>low</sup> /TME <sup>high</sup> | ICGC_LIRI_JP |
| HCCDB.18.S11     | 17.00 | 0.00 | -0.54 | -0.93 | FALSE | FALSE | Mixed                                       | ICGC_LIRI_JP |
| HCCDB.18.S119    | 18.00 | 0.00 | 0.24  | 0.01  | TRUE  | TRUE  | Mixed                                       | ICGC_LIRI_JP |
| HCCDB.18.S12     | 13.00 | 0.00 | -0.76 | -0.74 | FALSE | FALSE | Mixed                                       | ICGC_LIRI_JP |
| HCCDB.18.S121    | 8.00  | 0.00 | -1.60 | 2.05  | FALSE | TRUE  | Hypoxia <sup>high</sup> /TME <sup>low</sup> | ICGC_LIRI_JP |
| HCCDB.18.S124    | 24.00 | 0.00 | 0.98  | -0.13 | TRUE  | FALSE | Hypoxia <sup>low</sup> /TME <sup>high</sup> | ICGC_LIRI_JP |
| HCCDB.18.S136    | 23.00 | 1.00 | 0.03  | 0.20  | TRUE  | TRUE  | Mixed                                       | ICGC_LIRI_JP |
| HCCDB.18.S138    | 27.00 | 0.00 | 0.14  | -0.11 | TRUE  | FALSE | Hypoxia <sup>low</sup> /TME <sup>high</sup> | ICGC_LIRI_JP |
| HCCDB.18.S149    | 30.00 | 0.00 | -1.34 | 3.43  | FALSE | TRUE  | Hypoxia <sup>high</sup> /TME <sup>low</sup> | ICGC_LIRI_JP |
| HCCDB.18.S15     | 17.00 | 0.00 | -0.80 | -0.84 | FALSE | FALSE | Mixed                                       | ICGC_LIRI_JP |
| HCCDB.18.S152    | 30.00 | 0.00 | 1.40  | 0.67  | TRUE  | TRUE  | Mixed                                       | ICGC_LIRI_JP |
| HCCDB.18.S153    | 53.00 | 0.00 | -0.77 | -1.06 | FALSE | FALSE | Mixed                                       | ICGC_LIRI_JP |
| HCCDB.18.S154    | 54.00 | 0.00 | -0.63 | 0.47  | FALSE | TRUE  | Hypoxia <sup>high</sup> /TME <sup>low</sup> | ICGC_LIRI_JP |
| HCCDB.18.S166    | 30.00 | 1.00 | -0.79 | -0.40 | FALSE | FALSE | Mixed                                       | ICGC_LIRI_JP |
| HCCDB.18.S170    | 30.00 | 0.00 | 0.18  | -1.57 | TRUE  | FALSE | Hypoxia <sup>low</sup> /TME <sup>high</sup> | ICGC_LIRI_JP |
| HCCDB.18.S173    | 6.00  | 1.00 | 1.20  | 0.66  | TRUE  | TRUE  | Mixed                                       | ICGC_LIRI_JP |
| HCCDB.18.S184    | 40.00 | 0.00 | -0.08 | -1.28 | FALSE | FALSE | Mixed                                       | ICGC_LIRI_JP |
| HCCDB.18.S185    | 1.00  | 1.00 | 0.35  | -0.01 | TRUE  | FALSE | Hypoxia <sup>low</sup> /TME <sup>high</sup> | ICGC_LIRI_JP |
| HCCDB.18.S186    | 41.00 | 0.00 | -0.78 | 2.51  | FALSE | TRUE  | Hypoxia <sup>high</sup> /TME <sup>low</sup> | ICGC_LIRI_JP |
| HCCDB.18.S192    | 21.00 | 0.00 | 0.02  | 0.45  | TRUE  | TRUE  | Mixed                                       | ICGC_LIRI_JP |
| HCCDB.18.S194    | 35.00 | 0.00 | -0.31 | -1.69 | FALSE | FALSE | Mixed                                       | ICGC_LIRI_JP |
| HCCDB.18.S196    | 35.00 | 0.00 | 1.60  | -1.22 | TRUE  | FALSE | Hypoxia <sup>low</sup> /TME <sup>high</sup> | ICGC_LIRI_JP |
| HCCDB.18.S199    | 36.00 | 0.00 | -0.83 | -0.73 | FALSE | FALSE | Mixed                                       | ICGC_LIRI_JP |
| HCCDB.18.S22     | 18.00 | 0.00 | -0.12 | -1.29 | FALSE | FALSE | Mixed                                       | ICGC_LIRI_JP |
| HCCDB.18.S24     | 24.00 | 1.00 | 0.43  | 0.65  | TRUE  | TRUE  | Mixed                                       | ICGC_LIRI_JP |
| HCCDB.18.S37     | 3.00  | 1.00 | -0.92 | -0.14 | FALSE | FALSE | Mixed                                       | ICGC_LIRI_JP |
| HCCDB.18.S38     | 23.00 | 0.00 | 0.12  | 0.60  | TRUE  | TRUE  | Mixed                                       | ICGC_LIRI_JP |
| HCCDB.18.S47     | 27.00 | 0.00 | 1.51  | 0.01  | TRUE  | TRUE  | Mixed                                       | ICGC_LIRI_JP |
| HCCDB.18.S48     | 11.00 | 0.00 | 1.46  | -0.05 | TRUE  | FALSE | Hypoxia <sup>low</sup> /TME <sup>high</sup> | ICGC_LIRI_JP |
| HCCDB.18.S49     | 29.00 | 0.00 | -0.32 | -0.12 | FALSE | FALSE | Mixed                                       | ICGC_LIRI_JP |
| HCCDB.18.S51     | 7.00  | 0.00 | -0.64 | 1.20  | FALSE | TRUE  | Hypoxia <sup>high</sup> /TME <sup>low</sup> | ICGC_LIRI_JP |
| HCCDB.18.S52     | 36.00 | 0.00 | 0.13  | 1.20  | TRUE  | TRUE  | Mixed                                       | ICGC_LIRI_JP |
| HCCDB.18.S53     | 29.00 | 0.00 | -0.76 | 0.41  | FALSE | TRUE  | Hypoxia <sup>high</sup> /TME <sup>low</sup> | ICGC_LIRI_JP |
| HCCDB.18.S54     | 30.00 | 0.00 | 1.03  | -0.21 | TRUE  | FALSE | Hypoxia <sup>low</sup> /TME <sup>high</sup> | ICGC_LIRI_JP |
| HCCDB.18.S55     | 30.00 | 0.00 | -0.41 | 1.00  | FALSE | TRUE  | Hypoxia <sup>high</sup> /TME <sup>low</sup> | ICGC_LIRI_JP |
| HCCDB.18.S56     | 34.00 | 0.00 | 1.17  | -0.62 | TRUE  | FALSE | Hypoxia <sup>low</sup> /TME <sup>high</sup> | ICGC_LIRI_JP |
| HCCDB.18.S57     | 34.00 | 0.00 | -0.90 | 0.28  | FALSE | TRUE  | Hypoxia <sup>high</sup> /TME <sup>low</sup> | ICGC_LIRI_JP |
| HCCDB.18.S60     | 9.00  | 1.00 | -0.37 | -0.03 | FALSE | FALSE | Mixed                                       | ICGC_LIRI_JP |
| HCCDB.18.S62     | 40.00 | 0.00 | 1.35  | -0.68 | TRUE  | FALSE | Hypoxia <sup>low</sup> /TME <sup>high</sup> | ICGC_LIRI_JP |
| HCCDB.18.S63     | 39.00 | 0.00 | 1.87  | -0.13 | TRUE  | FALSE | Hypoxia <sup>low</sup> /TME <sup>high</sup> | ICGC_LIRI_JP |
| HCCDB.18.S65     | 35.00 | 0.00 | 1.66  | 0.06  | TRUE  | TRUE  | Mixed                                       | ICGC_LIRI_JP |
| HCCDB.18.S67     | 39.00 | 0.00 | 0.71  | -0.23 | TRUE  | FALSE | Hypoxia <sup>low</sup> /TME <sup>high</sup> | ICGC_LIRI_JP |
| HCCDB.18.S68     | 30.00 | 0.00 | -2.33 | 2.10  | FALSE | TRUE  | Hypoxia <sup>high</sup> /TME <sup>low</sup> | ICGC_LIRI_JP |
| HCCDB.18.S75     | 49.00 | 0.00 | -1.53 | -0.16 | FALSE | FALSE | Mixed                                       | ICGC_LIRI_JP |
| HCCDB.18.S77     | 66.00 | 0.00 | -1.21 | 0.04  | FALSE | TRUE  | Hypoxia <sup>high</sup> /TME <sup>low</sup> | ICGC_LIRI_JP |
| HCCDB.18.S83     | 44.00 | 0.00 | 0.86  | -0.12 | TRUE  | FALSE | Hypoxia <sup>low</sup> /TME <sup>high</sup> | ICGC_LIRI_JP |
| HCCDB.18.S91     | 51.00 | 0.00 | 0.82  | -0.92 | TRUE  | FALSE | Hypoxia <sup>low</sup> /TME <sup>high</sup> | ICGC_LIRI_JP |
| HCCDB.18.S93     | 17.00 | 1.00 | -1.28 | 0.34  | FALSE | TRUE  | Hypoxia <sup>high</sup> /TME <sup>low</sup> | ICGC_LIRI_JP |
| HCCDB.18.S97     | 52.00 | 0.00 | 0.84  | -0.24 | TRUE  | FALSE | Hypoxia <sup>low</sup> /TME <sup>high</sup> | ICGC_LIRI_JP |
| TCGA.2Y.A9GS.01A | 24.13 | 1.00 | -0.07 | 0.09  | FALSE | TRUE  | Hypoxia <sup>high</sup> /TME <sup>low</sup> | TCGA_LIHC    |
| TCGA.2Y.A9GT.01A | 54.13 | 1.00 | 2.12  | -1.82 | TRUE  | FALSE | Hypoxia <sup>low</sup> /TME <sup>high</sup> | TCGA_LIHC    |
| TCGA.2Y.A9GU.01A | 64.63 | 0.00 | 0.08  | -0.77 | TRUE  | FALSE | Hypoxia <sup>low</sup> /TME <sup>high</sup> | TCGA_LIHC    |
| TCGA.2Y.A9GV.01A | 84.40 | 1.00 | 1.29  | -1.49 | TRUE  | FALSE | Hypoxia <sup>low</sup> /TME <sup>high</sup> | TCGA_LIHC    |
| TCGA.2Y.A9GX.01A | 81.40 | 0.00 | 1.51  | 0.01  | TRUE  | TRUE  | Mixed                                       | TCGA_LIHC    |
| TCGA.2Y.A9GZ.01A | 28.27 | 1.00 | 0.66  | -1.15 | TRUE  | FALSE | Hypoxia <sup>low</sup> /TME <sup>high</sup> | TCGA_LIHC    |
| TCGA.2Y.A9H2.01A | 57.70 | 0.00 | -0.99 | 0.20  | FALSE | TRUE  | Hypoxia <sup>high</sup> /TME <sup>low</sup> | TCGA_LIHC    |
| TCGA.2Y.A9H3.01A | 50.53 | 0.00 | 1.38  | -0.54 | TRUE  | FALSE | Hypoxia <sup>low</sup> /TME <sup>high</sup> | TCGA_LIHC    |
| TCGA.2Y.A9H4.01A | 48.40 | 0.00 | 0.32  | -0.60 | TRUE  | FALSE | Hypoxia <sup>low</sup> /TME <sup>high</sup> | TCGA_LIHC    |
| TCGA.2Y.A9H7.01A | 38.93 | 0.00 | -0.29 | 0.30  | FALSE | TRUE  | Hypoxia <sup>high</sup> /TME <sup>low</sup> | TCGA_LIHC    |
| TCGA.2Y.A9H8.01A | 21.10 | 1.00 | 0.17  | 0.18  | TRUE  | TRUE  | Mixed                                       | TCGA_LIHC    |

|                  |        |      |       |       |       |       |                                             |           |
|------------------|--------|------|-------|-------|-------|-------|---------------------------------------------|-----------|
| TCGA.4R.AA8I.01A | 8.73   | 1.00 | 0.32  | -1.04 | TRUE  | FALSE | Hypoxia <sup>low</sup> /TME <sup>high</sup> | TCGA_LIHC |
| TCGA.5C.AAPD.01A | 0.67   | 0.00 | 1.54  | -0.07 | TRUE  | FALSE | Hypoxia <sup>low</sup> /TME <sup>high</sup> | TCGA_LIHC |
| TCGA.5R.AA1C.01A | 17.33  | 0.00 | 0.23  | -0.14 | TRUE  | FALSE | Hypoxia <sup>low</sup> /TME <sup>high</sup> | TCGA_LIHC |
| TCGA.5R.AA1D.01A | 14.97  | 0.00 | 1.05  | -0.05 | TRUE  | FALSE | Hypoxia <sup>low</sup> /TME <sup>high</sup> | TCGA_LIHC |
| TCGA.5R.AAAM.01A | 1.53   | 1.00 | 1.36  | -0.22 | TRUE  | FALSE | Hypoxia <sup>low</sup> /TME <sup>high</sup> | TCGA_LIHC |
| TCGA.BC.A10W.01A | 3.03   | 1.00 | -0.88 | 0.01  | FALSE | TRUE  | Hypoxia <sup>high</sup> /TME <sup>low</sup> | TCGA_LIHC |
| TCGA.BD.A2L6.01A | 45.43  | 0.00 | -0.15 | -0.69 | FALSE | FALSE | Mixed                                       | TCGA_LIHC |
| TCGA.BD.A3ER.01A | 37.17  | 0.00 | 0.19  | 0.34  | TRUE  | TRUE  | Mixed                                       | TCGA_LIHC |
| TCGA.CC.5258.01A | 4.30   | 1.00 | -0.56 | 0.76  | FALSE | TRUE  | Hypoxia <sup>high</sup> /TME <sup>low</sup> | TCGA_LIHC |
| TCGA.CC.5259.01A | 8.33   | 0.00 | -0.28 | 1.06  | FALSE | TRUE  | Hypoxia <sup>high</sup> /TME <sup>low</sup> | TCGA_LIHC |
| TCGA.CC.5260.01A | 2.90   | 1.00 | -1.87 | 1.12  | FALSE | TRUE  | Hypoxia <sup>high</sup> /TME <sup>low</sup> | TCGA_LIHC |
| TCGA.CC.5261.01A | 3.23   | 1.00 | 0.97  | -0.18 | TRUE  | FALSE | Hypoxia <sup>low</sup> /TME <sup>high</sup> | TCGA_LIHC |
| TCGA.CC.5262.01A | 3.43   | 1.00 | -0.01 | 0.91  | FALSE | TRUE  | Hypoxia <sup>high</sup> /TME <sup>low</sup> | TCGA_LIHC |
| TCGA.CC.5263.01A | 4.30   | 1.00 | -1.80 | 2.07  | FALSE | TRUE  | Hypoxia <sup>high</sup> /TME <sup>low</sup> | TCGA_LIHC |
| TCGA.CC.5264.01A | 3.40   | 1.00 | -1.45 | 1.23  | FALSE | TRUE  | Hypoxia <sup>high</sup> /TME <sup>low</sup> | TCGA_LIHC |
| TCGA.CC.A123.01A | 7.30   | 0.00 | -0.81 | 0.74  | FALSE | TRUE  | Hypoxia <sup>high</sup> /TME <sup>low</sup> | TCGA_LIHC |
| TCGA.CC.A1HT.01A | 3.37   | 1.00 | -0.54 | 1.19  | FALSE | TRUE  | Hypoxia <sup>high</sup> /TME <sup>low</sup> | TCGA_LIHC |
| TCGA.CC.A3M9.01A | 10.00  | 1.00 | -0.47 | 1.66  | FALSE | TRUE  | Hypoxia <sup>high</sup> /TME <sup>low</sup> | TCGA_LIHC |
| TCGA.CC.A3MA.01A | 10.10  | 1.00 | -1.84 | 0.58  | FALSE | TRUE  | Hypoxia <sup>high</sup> /TME <sup>low</sup> | TCGA_LIHC |
| TCGA.CC.A3MB.01A | 10.50  | 1.00 | -0.08 | 1.07  | FALSE | TRUE  | Hypoxia <sup>high</sup> /TME <sup>low</sup> | TCGA_LIHC |
| TCGA.CC.A3MC.01A | 12.10  | 0.00 | -0.46 | 0.48  | FALSE | TRUE  | Hypoxia <sup>high</sup> /TME <sup>low</sup> | TCGA_LIHC |
| TCGA.CC.A5UC.01A | 11.57  | 1.00 | -0.15 | 1.45  | FALSE | TRUE  | Hypoxia <sup>high</sup> /TME <sup>low</sup> | TCGA_LIHC |
| TCGA.CC.A5UD.01A | 10.13  | 1.00 | -1.79 | -0.65 | FALSE | FALSE | Mixed                                       | TCGA_LIHC |
| TCGA.CC.A5UE.01A | 9.07   | 1.00 | -0.86 | 0.52  | FALSE | TRUE  | Hypoxia <sup>high</sup> /TME <sup>low</sup> | TCGA_LIHC |
| TCGA.CC.A7IE.01A | 7.23   | 1.00 | 0.51  | 1.08  | TRUE  | TRUE  | Mixed                                       | TCGA_LIHC |
| TCGA.CC.A7IF.01A | 21.63  | 1.00 | 0.21  | -0.83 | TRUE  | FALSE | Hypoxia <sup>low</sup> /TME <sup>high</sup> | TCGA_LIHC |
| TCGA.CC.A7IG.01A | 9.97   | 1.00 | -1.58 | 0.53  | FALSE | TRUE  | Hypoxia <sup>high</sup> /TME <sup>low</sup> | TCGA_LIHC |
| TCGA.CC.A7IH.01A | 12.17  | 0.00 | -0.22 | -1.16 | FALSE | FALSE | Mixed                                       | TCGA_LIHC |
| TCGA.CC.A7II.01A | 13.30  | 0.00 | -2.68 | 3.28  | FALSE | TRUE  | Hypoxia <sup>high</sup> /TME <sup>low</sup> | TCGA_LIHC |
| TCGA.CC.A7IJ.01A | 12.73  | 0.00 | -1.04 | 1.41  | FALSE | TRUE  | Hypoxia <sup>high</sup> /TME <sup>low</sup> | TCGA_LIHC |
| TCGA.CC.A7IK.01A | 8.73   | 1.00 | -0.13 | -0.75 | FALSE | FALSE | Mixed                                       | TCGA_LIHC |
| TCGA.CC.A7IL.01A | 9.27   | 1.00 | 0.21  | -0.30 | TRUE  | FALSE | Hypoxia <sup>low</sup> /TME <sup>high</sup> | TCGA_LIHC |
| TCGA.CC.A8HS.01A | 10.00  | 1.00 | -1.02 | 0.56  | FALSE | TRUE  | Hypoxia <sup>high</sup> /TME <sup>low</sup> | TCGA_LIHC |
| TCGA.CC.A8HT.01A | 4.67   | 1.00 | -0.47 | 0.82  | FALSE | TRUE  | Hypoxia <sup>high</sup> /TME <sup>low</sup> | TCGA_LIHC |
| TCGA.CC.A8HU.01A | 11.47  | 1.00 | -1.26 | 0.63  | FALSE | TRUE  | Hypoxia <sup>high</sup> /TME <sup>low</sup> | TCGA_LIHC |
| TCGA.CC.A8HV.01A | 9.30   | 1.00 | -0.93 | -0.18 | FALSE | FALSE | Mixed                                       | TCGA_LIHC |
| TCGA.CC.A9FS.01A | 7.03   | 0.00 | 0.29  | -0.78 | TRUE  | FALSE | Hypoxia <sup>low</sup> /TME <sup>high</sup> | TCGA_LIHC |
| TCGA.CC.A9FU.01A | 26.97  | 0.00 | -0.78 | 1.54  | FALSE | TRUE  | Hypoxia <sup>high</sup> /TME <sup>low</sup> | TCGA_LIHC |
| TCGA.CC.A9FV.01A | 26.97  | 0.00 | 0.03  | -0.42 | TRUE  | FALSE | Hypoxia <sup>low</sup> /TME <sup>high</sup> | TCGA_LIHC |
| TCGA.CC.A9FW.01A | 8.27   | 0.00 | -0.29 | 1.14  | FALSE | TRUE  | Hypoxia <sup>high</sup> /TME <sup>low</sup> | TCGA_LIHC |
| TCGA.DD.A113.01A | 80.83  | 0.00 | -0.37 | -0.79 | FALSE | FALSE | Mixed                                       | TCGA_LIHC |
| TCGA.DD.A114.01A | 38.30  | 1.00 | 0.50  | 0.25  | TRUE  | TRUE  | Mixed                                       | TCGA_LIHC |
| TCGA.DD.A115.01A | 84.73  | 1.00 | 0.18  | -0.38 | TRUE  | FALSE | Hypoxia <sup>low</sup> /TME <sup>high</sup> | TCGA_LIHC |
| TCGA.DD.A116.01A | 54.07  | 1.00 | 0.23  | -0.18 | TRUE  | FALSE | Hypoxia <sup>low</sup> /TME <sup>high</sup> | TCGA_LIHC |
| TCGA.DD.A118.01A | 114.57 | 0.00 | -0.50 | -0.81 | FALSE | FALSE | Mixed                                       | TCGA_LIHC |
| TCGA.DD.A119.01A | 7.43   | 1.00 | -0.04 | 0.30  | FALSE | TRUE  | Hypoxia <sup>high</sup> /TME <sup>low</sup> | TCGA_LIHC |
| TCGA.DD.A11B.01A | 0.47   | 1.00 | 0.50  | -0.42 | TRUE  | FALSE | Hypoxia <sup>low</sup> /TME <sup>high</sup> | TCGA_LIHC |
| TCGA.DD.A11C.01A | 22.07  | 0.00 | 0.44  | -1.09 | TRUE  | FALSE | Hypoxia <sup>low</sup> /TME <sup>high</sup> | TCGA_LIHC |
| TCGA.DD.A1EA.01A | 80.50  | 0.00 | 1.43  | -1.23 | TRUE  | FALSE | Hypoxia <sup>low</sup> /TME <sup>high</sup> | TCGA_LIHC |
| TCGA.DD.A1EB.01A | 67.23  | 0.00 | 1.00  | -2.17 | TRUE  | FALSE | Hypoxia <sup>low</sup> /TME <sup>high</sup> | TCGA_LIHC |
| TCGA.DD.A1ED.01A | 76.70  | 0.00 | 1.00  | -0.43 | TRUE  | FALSE | Hypoxia <sup>low</sup> /TME <sup>high</sup> | TCGA_LIHC |
| TCGA.DD.A1EE.01A | 11.63  | 1.00 | -0.43 | 0.38  | FALSE | TRUE  | Hypoxia <sup>high</sup> /TME <sup>low</sup> | TCGA_LIHC |
| TCGA.DD.A1EF.01A | 13.13  | 1.00 | 0.24  | 0.35  | TRUE  | TRUE  | Mixed                                       | TCGA_LIHC |
| TCGA.DD.A1EG.01A | 45.73  | 1.00 | 0.65  | 0.30  | TRUE  | TRUE  | Mixed                                       | TCGA_LIHC |
| TCGA.DD.A1EH.01A | 49.83  | 0.00 | -0.22 | 0.34  | FALSE | TRUE  | Hypoxia <sup>high</sup> /TME <sup>low</sup> | TCGA_LIHC |
| TCGA.DD.A1EI.01A | 6.10   | 0.00 | 0.11  | 0.20  | TRUE  | TRUE  | Mixed                                       | TCGA_LIHC |
| TCGA.DD.A1EJ.01A | 33.50  | 1.00 | -0.08 | 1.70  | FALSE | TRUE  | Hypoxia <sup>high</sup> /TME <sup>low</sup> | TCGA_LIHC |
| TCGA.DD.A1EK.01A | 18.60  | 1.00 | 0.77  | 0.46  | TRUE  | TRUE  | Mixed                                       | TCGA_LIHC |
| TCGA.DD.A1EL.01A | 13.83  | 1.00 | -0.34 | 1.16  | FALSE | TRUE  | Hypoxia <sup>high</sup> /TME <sup>low</sup> | TCGA_LIHC |
| TCGA.DD.A39X.01A | 56.47  | 1.00 | -0.61 | -0.21 | FALSE | FALSE | Mixed                                       | TCGA_LIHC |
| TCGA.DD.A39Y.01A | 5.70   | 1.00 | -1.32 | 1.66  | FALSE | TRUE  | Hypoxia <sup>high</sup> /TME <sup>low</sup> | TCGA_LIHC |
| TCGA.DD.A3A6.01A | 108.60 | 1.00 | -0.05 | -1.81 | FALSE | FALSE | Mixed                                       | TCGA_LIHC |
| TCGA.DD.A3A7.01A | 13.97  | 1.00 | -0.42 | 1.07  | FALSE | TRUE  | Hypoxia <sup>high</sup> /TME <sup>low</sup> | TCGA_LIHC |
| TCGA.DD.A3A8.01A | 0.37   | 1.00 | -0.21 | -0.83 | FALSE | FALSE | Mixed                                       | TCGA_LIHC |
| TCGA.DD.A4NA.01A | 33.60  | 0.00 | -1.21 | 1.20  | FALSE | TRUE  | Hypoxia <sup>high</sup> /TME <sup>low</sup> | TCGA_LIHC |
| TCGA.DD.A4NE.01A | 22.00  | 1.00 | -0.56 | -0.22 | FALSE | FALSE | Mixed                                       | TCGA_LIHC |
| TCGA.DD.A4NF.01A | 31.40  | 0.00 | -0.01 | -1.10 | FALSE | FALSE | Mixed                                       | TCGA_LIHC |
| TCGA.DD.A4NG.01A | 26.73  | 1.00 | 0.19  | 0.34  | TRUE  | TRUE  | Mixed                                       | TCGA_LIHC |
| TCGA.DD.A4NH.01A | 30.57  | 0.00 | -0.53 | 1.48  | FALSE | TRUE  | Hypoxia <sup>high</sup> /TME <sup>low</sup> | TCGA_LIHC |
| TCGA.DD.A4NI.01A | 27.20  | 0.00 | 2.04  | -0.71 | TRUE  | FALSE | Hypoxia <sup>low</sup> /TME <sup>high</sup> | TCGA_LIHC |
| TCGA.DD.A4NJ.01A | 30.93  | 0.00 | 0.09  | -0.54 | TRUE  | FALSE | Hypoxia <sup>low</sup> /TME <sup>high</sup> | TCGA_LIHC |
| TCGA.DD.A4NK.01A | 40.33  | 1.00 | 0.51  | -1.43 | TRUE  | FALSE | Hypoxia <sup>low</sup> /TME <sup>high</sup> | TCGA_LIHC |
| TCGA.DD.A4NL.01A | 57.03  | 0.00 | 1.00  | -0.94 | TRUE  | FALSE | Hypoxia <sup>low</sup> /TME <sup>high</sup> | TCGA_LIHC |
| TCGA.DD.A4NO.01A | 74.83  | 0.00 | 0.90  | -0.69 | TRUE  | FALSE | Hypoxia <sup>low</sup> /TME <sup>high</sup> | TCGA_LIHC |
| TCGA.DD.A4NP.01A | 110.27 | 0.00 | 0.29  | -0.93 | TRUE  | FALSE | Hypoxia <sup>low</sup> /TME <sup>high</sup> | TCGA_LIHC |
| TCGA.DD.A4NQ.01A | 12.43  | 1.00 | -0.98 | 1.61  | FALSE | TRUE  | Hypoxia <sup>high</sup> /TME <sup>low</sup> | TCGA_LIHC |
| TCGA.DD.A4NR.01A | 0.30   | 1.00 | 1.22  | 0.58  | TRUE  | TRUE  | Mixed                                       | TCGA_LIHC |
| TCGA.DD.A4NS.01A | 81.87  | 1.00 | 1.15  | -0.45 | TRUE  | FALSE | Hypoxia <sup>low</sup> /TME <sup>high</sup> | TCGA_LIHC |

|                  |        |      |       |       |       |       |                                             |           |
|------------------|--------|------|-------|-------|-------|-------|---------------------------------------------|-----------|
| TCGA.DD.A4NV.01A | 79.93  | 0.00 | 1.17  | -2.02 | TRUE  | FALSE | Hypoxia <sup>low</sup> /TME <sup>high</sup> | TCGA_LIHC |
| TCGA.DD.A73A.01A | 24.27  | 0.00 | 0.90  | -0.49 | TRUE  | FALSE | Hypoxia <sup>low</sup> /TME <sup>high</sup> | TCGA_LIHC |
| TCGA.DD.A73B.01A | 9.43   | 1.00 | 0.01  | -0.25 | TRUE  | FALSE | Hypoxia <sup>low</sup> /TME <sup>high</sup> | TCGA_LIHC |
| TCGA.DD.A73C.01A | 23.37  | 0.00 | 1.38  | -1.59 | TRUE  | FALSE | Hypoxia <sup>low</sup> /TME <sup>high</sup> | TCGA_LIHC |
| TCGA.DD.A73D.01A | 23.10  | 0.00 | 0.27  | -0.44 | TRUE  | FALSE | Hypoxia <sup>low</sup> /TME <sup>high</sup> | TCGA_LIHC |
| TCGA.DD.A73E.01A | 1.47   | 0.00 | -0.67 | -1.34 | FALSE | FALSE | Mixed                                       | TCGA_LIHC |
| TCGA.DD.A73G.01A | 115.93 | 0.00 | -0.77 | 0.39  | FALSE | TRUE  | Hypoxia <sup>high</sup> /TME <sup>low</sup> | TCGA_LIHC |
| TCGA.DD.AA3A.01A | 13.67  | 1.00 | -2.14 | 1.65  | FALSE | TRUE  | Hypoxia <sup>high</sup> /TME <sup>low</sup> | TCGA_LIHC |
| TCGA.ED.A459.01A | 30.33  | 0.00 | 0.06  | 1.05  | TRUE  | TRUE  | Mixed                                       | TCGA_LIHC |
| TCGA.ED.A4X1.01A | 27.30  | 0.00 | 0.92  | -0.73 | TRUE  | FALSE | Hypoxia <sup>low</sup> /TME <sup>high</sup> | TCGA_LIHC |
| TCGA.ED.A5KG.01A | 28.47  | 0.00 | 4.18  | 0.60  | TRUE  | TRUE  | Mixed                                       | TCGA_LIHC |
| TCGA.ED.A627.01A | 14.10  | 0.00 | 2.34  | 0.15  | TRUE  | TRUE  | Mixed                                       | TCGA_LIHC |
| TCGA.ED.A66X.01A | 13.53  | 0.00 | 0.09  | 0.31  | TRUE  | TRUE  | Mixed                                       | TCGA_LIHC |
| TCGA.ED.A66Y.01A | 9.87   | 1.00 | -1.35 | -0.08 | FALSE | FALSE | Mixed                                       | TCGA_LIHC |
| TCGA.ED.A7PX.01A | 0.20   | 0.00 | -1.20 | 0.59  | FALSE | TRUE  | Hypoxia <sup>high</sup> /TME <sup>low</sup> | TCGA_LIHC |
| TCGA.ED.A7PY.01A | 13.00  | 0.00 | -0.35 | -0.72 | FALSE | FALSE | Mixed                                       | TCGA_LIHC |
| TCGA.ED.A7PZ.01A | 0.20   | 0.00 | -0.88 | 1.30  | FALSE | TRUE  | Hypoxia <sup>high</sup> /TME <sup>low</sup> | TCGA_LIHC |
| TCGA.ED.A7XO.01A | 14.23  | 0.00 | 0.72  | -0.35 | TRUE  | FALSE | Hypoxia <sup>low</sup> /TME <sup>high</sup> | TCGA_LIHC |
| TCGA.ED.A7XP.01A | 13.33  | 0.00 | 0.63  | -0.45 | TRUE  | FALSE | Hypoxia <sup>low</sup> /TME <sup>high</sup> | TCGA_LIHC |
| TCGA.ED.A82E.01A | 13.60  | 0.00 | -1.82 | 1.69  | FALSE | TRUE  | Hypoxia <sup>high</sup> /TME <sup>low</sup> | TCGA_LIHC |
| TCGA.ED.A8O5.01A | 13.53  | 0.00 | -0.28 | -0.30 | FALSE | FALSE | Mixed                                       | TCGA_LIHC |
| TCGA.ED.A8O6.01A | 1.87   | 1.00 | -0.82 | 0.38  | FALSE | TRUE  | Hypoxia <sup>high</sup> /TME <sup>low</sup> | TCGA_LIHC |
| TCGA.ED.A97K.01A | 0.20   | 0.00 | -0.41 | 1.04  | FALSE | TRUE  | Hypoxia <sup>high</sup> /TME <sup>low</sup> | TCGA_LIHC |
| TCGA.FV.A311.01A | 8.23   | 1.00 | 0.38  | -0.01 | TRUE  | FALSE | Hypoxia <sup>low</sup> /TME <sup>high</sup> | TCGA_LIHC |
| TCGA.FV.A3R2.01A | 6.47   | 1.00 | 0.05  | 0.29  | TRUE  | TRUE  | Mixed                                       | TCGA_LIHC |
| TCGA.G3.A6UC.01A | 22.37  | 0.00 | 0.30  | -1.59 | TRUE  | FALSE | Hypoxia <sup>low</sup> /TME <sup>high</sup> | TCGA_LIHC |
| TCGA.G3.A7M5.01A | 14.90  | 0.00 | 0.57  | -1.33 | TRUE  | FALSE | Hypoxia <sup>low</sup> /TME <sup>high</sup> | TCGA_LIHC |
| TCGA.G3.A7M7.01A | 12.03  | 0.00 | 0.44  | -0.14 | TRUE  | FALSE | Hypoxia <sup>low</sup> /TME <sup>high</sup> | TCGA_LIHC |
| TCGA.G3.A7M8.01A | 14.33  | 0.00 | 0.73  | -0.67 | TRUE  | FALSE | Hypoxia <sup>low</sup> /TME <sup>high</sup> | TCGA_LIHC |
| TCGA.G3.A7M9.01A | 1.87   | 1.00 | -2.74 | 2.41  | FALSE | TRUE  | Hypoxia <sup>high</sup> /TME <sup>low</sup> | TCGA_LIHC |
| TCGA.G3.AAUZ.01A | 16.00  | 0.00 | 0.61  | 0.31  | TRUE  | TRUE  | Mixed                                       | TCGA_LIHC |
| TCGA.G3.AAV0.01A | 15.87  | 0.00 | 0.76  | -1.33 | TRUE  | FALSE | Hypoxia <sup>low</sup> /TME <sup>high</sup> | TCGA_LIHC |
| TCGA.G3.AAV1.01A | 11.97  | 1.00 | 0.57  | 0.05  | TRUE  | TRUE  | Mixed                                       | TCGA_LIHC |
| TCGA.G3.AAV2.01A | 12.40  | 0.00 | 0.40  | -1.52 | TRUE  | FALSE | Hypoxia <sup>low</sup> /TME <sup>high</sup> | TCGA_LIHC |
| TCGA.G3.AAV5.01A | 11.80  | 0.00 | -0.20 | 0.56  | FALSE | TRUE  | Hypoxia <sup>high</sup> /TME <sup>low</sup> | TCGA_LIHC |
| TCGA.G3.AAV6.01A | 2.17   | 1.00 | -1.56 | 1.64  | FALSE | TRUE  | Hypoxia <sup>high</sup> /TME <sup>low</sup> | TCGA_LIHC |
| TCGA.G3.AAV7.01A | 12.03  | 0.00 | -1.86 | 1.42  | FALSE | TRUE  | Hypoxia <sup>high</sup> /TME <sup>low</sup> | TCGA_LIHC |
| TCGA.HP.A5MZ.01A | 3.03   | 1.00 | 1.14  | -0.22 | TRUE  | FALSE | Hypoxia <sup>low</sup> /TME <sup>high</sup> | TCGA_LIHC |
| TCGA.MI.A75C.01A | 9.70   | 0.00 | -0.41 | -0.18 | FALSE | FALSE | Mixed                                       | TCGA_LIHC |
| TCGA.MR.A520.01A | 7.63   | 0.00 | 0.84  | -0.53 | TRUE  | FALSE | Hypoxia <sup>low</sup> /TME <sup>high</sup> | TCGA_LIHC |
| TCGA.MR.A8JO.01A | 11.00  | 0.00 | 0.94  | 0.14  | TRUE  | TRUE  | Mixed                                       | TCGA_LIHC |
| TCGA.UB.A7MA.01A | 28.27  | 0.00 | -1.78 | 0.33  | FALSE | TRUE  | Hypoxia <sup>high</sup> /TME <sup>low</sup> | TCGA_LIHC |
| TCGA.UB.A7MB.01A | 20.03  | 0.00 | -0.56 | -2.02 | FALSE | FALSE | Mixed                                       | TCGA_LIHC |
| TCGA.UB.A7MC.01A | 16.67  | 0.00 | -0.33 | -0.19 | FALSE | FALSE | Mixed                                       | TCGA_LIHC |
| TCGA.UB.A7MD.01A | 1.73   | 1.00 | 0.46  | 0.20  | TRUE  | TRUE  | Mixed                                       | TCGA_LIHC |
| TCGA.UB.A7ME.01A | 16.20  | 0.00 | 1.18  | -0.18 | TRUE  | FALSE | Hypoxia <sup>low</sup> /TME <sup>high</sup> | TCGA_LIHC |
| TCGA.UB.A7MF.01A | 7.13   | 1.00 | 0.26  | 0.34  | TRUE  | TRUE  | Mixed                                       | TCGA_LIHC |
| TCGA.UB.AA0U.01A | 10.90  | 0.00 | -0.19 | -0.42 | FALSE | FALSE | Mixed                                       | TCGA_LIHC |
| TCGA.UB.AA0V.01A | 10.47  | 0.00 | 0.95  | -0.59 | TRUE  | FALSE | Hypoxia <sup>low</sup> /TME <sup>high</sup> | TCGA_LIHC |
| TCGA.WJ.A86L.01A | 11.50  | 0.00 | 0.37  | -1.40 | TRUE  | FALSE | Hypoxia <sup>low</sup> /TME <sup>high</sup> | TCGA_LIHC |
| TCGA.ZP.A9CZ.01A | 23.53  | 0.00 | 0.49  | -0.26 | TRUE  | FALSE | Hypoxia <sup>low</sup> /TME <sup>high</sup> | TCGA_LIHC |
| TCGA.ZS.A9CD.01A | 46.20  | 1.00 | 0.26  | -0.42 | TRUE  | FALSE | Hypoxia <sup>low</sup> /TME <sup>high</sup> | TCGA_LIHC |
| TCGA.ZS.A9CE.01A | 41.37  | 0.00 | 0.28  | -2.42 | TRUE  | FALSE | Hypoxia <sup>low</sup> /TME <sup>high</sup> | TCGA_LIHC |
| TCGA.ZS.A9CF.01A | 80.40  | 0.00 | 0.01  | -0.90 | TRUE  | FALSE | Hypoxia <sup>low</sup> /TME <sup>high</sup> | TCGA_LIHC |
| TCGA.ZS.A9CG.01A | 11.37  | 0.00 | 0.39  | -0.95 | TRUE  | FALSE | Hypoxia <sup>low</sup> /TME <sup>high</sup> | TCGA_LIHC |

**S9. The cox regression analysis of Hypoxia-TME score in all HBV-related HCC cohorts**

|                             | <b>GSE14520(n=221)</b>           | <b>Univariate anysis</b> |              |        | <b>Multivariate analysis</b> |                    |                  |  |
|-----------------------------|----------------------------------|--------------------------|--------------|--------|------------------------------|--------------------|------------------|--|
|                             | Characteristics                  | HR                       | 95%CI        | P      | HR                           | 95%CI              | P                |  |
| <b>Training Sets</b>        | Gender,M vs F                    | 1.7                      | 0.821-3.522  | 0.153  |                              |                    |                  |  |
|                             | Age,years                        | 0.992                    | 0.973-1.011  | 0.405  |                              |                    |                  |  |
|                             | HBV_status,CC vs SVR-CC          | 0.748                    | 0.467-1.197  | 0.226  |                              |                    |                  |  |
|                             | ALT,U/L                          | 0.926                    | 0.603-1.422  | 0.727  |                              |                    |                  |  |
|                             | Tumor.size..cm.                  | 1.943                    | 1.265-2.985  | 0.002  | 0.928                        | 0.521-1.653        | 0.799            |  |
|                             | Tumor.number,multi vs single     | 1.592                    | 0.986-2.571  | 0.057  |                              |                    |                  |  |
|                             | Liver.cirrhosis, YES vs NO       | 4.624                    | 1.137-18.802 | 0.032  | 3.939                        | 0.96-16.16         | 0.057            |  |
|                             | TNM, III-IV vs I-II              | 3.424                    | 2.193-5.346  | <0.001 | 1.794                        | 0.803-4.008        | 0.154            |  |
|                             | BCLC,B-C vs 0-A                  | 3.457                    | 2.222-5.378  | <0.001 | 1.727                        | 0.849-3.514        | 0.132            |  |
|                             | AFP,>400 vs <=400                | 1.684                    | 1.099-2.582  | 0.017  | 1.085                        | 0.688-1.71         | 0.726            |  |
|                             | Hypoxia-TME classifier, per      | 2.048                    | 1.56-2.688   | <0.001 | <b>1.762</b>                 | <b>1.32-2.352</b>  | <b>&lt;0.001</b> |  |
|                             | <b>Gao-Fudan(n=159)</b>          |                          |              |        |                              |                    |                  |  |
|                             | Hypoxia-TME classifier, per      | 2.605                    | 1.773-3.828  | <0.001 | <b>1.674</b>                 | <b>1.101-2.546</b> | <b>0.016</b>     |  |
|                             | Gender,M vs F                    | 0.757                    | 0.406-1.41   | 0.381  |                              |                    |                  |  |
|                             | Age,years                        | 0.972                    | 0.949-0.995  | 0.018  | 0.981                        | 0.959-1.004        | 0.099            |  |
|                             | Liver.cirrhosis, YES vs NO       | 1.282                    | 0.699-2.35   | 0.422  |                              |                    |                  |  |
|                             | Tumor.number,multi vs single     | 1.051                    | 0.954-1.157  | 0.316  |                              |                    |                  |  |
|                             | Tumor.size.cm.                   | 1.163                    | 1.103-1.226  | <0.001 | 1.105                        | 1.027-1.189        | 0.008            |  |
|                             | Lymph.node.metastasis, YES vs NO | 1.752                    | 0.242-12.692 | 0.579  |                              |                    |                  |  |
|                             | Tumor.thrombus, YES vs NO        | 2.19                     | 1.262-3.803  | 0.005  | 1.223                        | 0.436-3.433        | 0.702            |  |
|                             | Tumour.epsulation, YES vs NO     | 0.848                    | 0.483-1.489  | 0.566  |                              |                    |                  |  |
|                             | PT.s.                            | 1.022                    | 0.868-1.204  | 0.792  |                              |                    |                  |  |
|                             | ALB,g.L.                         | 0.935                    | 0.866-1.01   | 0.089  |                              |                    |                  |  |
|                             | ALT,U/L                          | 0.999                    | 0.995-1.003  | 0.566  |                              |                    |                  |  |
|                             | y.GT,U/L                         | 1.001                    | 0.998-1.005  | 0.431  |                              |                    |                  |  |
| AFP,>400 vs <=400           | 3.528                            | 2.065-6.027              | <0.001       | 2.367  | 1.345-4.163                  | 0.003              |                  |  |
| BCLC,B-C vs 0-A             | 2.774                            | 1.51-5.096               | 0.001        | 1.133  | 0.467-2.748                  | 0.782              |                  |  |
| TNM, III-IV vs I-II         | 1.738                            | 1.024-2.953              | 0.041        | 0.64   | 0.233-1.759                  | 0.387              |                  |  |
| <b>ICGC_LIRI_JP(n=53)</b>   |                                  |                          |              |        |                              |                    |                  |  |
| Hypoxia-TME classifier, per | 1.24                             | 0.495-3.108              | 0.647        |        |                              |                    |                  |  |
| <b>GSE10143(n=19)</b>       |                                  |                          |              |        |                              |                    |                  |  |
| Hypoxia-TME classifier, per | 1.179                            | 0.495-2.807              | 0.71         |        |                              |                    |                  |  |
| <b>Validation Set</b>       | <b>TCGA(n=144)</b>               |                          |              |        |                              |                    |                  |  |
|                             | Characteristics                  | HR                       | 95%CI        | P      | HR                           | 95%CI              | P                |  |
|                             | Hypoxia-TME classifier, per      | 1.838                    | 1.351-2.501  | <0.001 | <b>1.571</b>                 | <b>1.124-2.194</b> | <b>0.008</b>     |  |
|                             | Gender,M vs F                    | 1.247                    | 0.735-2.117  | 0.413  |                              |                    |                  |  |
|                             | Vascular invasion, YES vs NO,    | 1.134                    | 0.59-2.177   | 0.707  |                              |                    |                  |  |
|                             | TNM, III-IV vs I-II              | 2.84                     | 1.692-4.769  | <0.001 | 1.762                        | 0.982-3.161        | 0.057            |  |
|                             | GradeG3-G4                       | 1.328                    | 0.787-2.242  | 0.288  |                              |                    |                  |  |
|                             | Child_pughB-C vs 0-A             | 0.809                    | 0.348-1.882  | 0.622  |                              |                    |                  |  |
|                             | TMB                              | 1.014                    | 0.979-1.05   | 0.446  |                              |                    |                  |  |
|                             | family_cancer_history YES vs NO  | 0.954                    | 0.55-1.653   | 0.866  |                              |                    |                  |  |
|                             | Alcohol.YES vs NO                | 0.849                    | 0.5-1.441    | 0.544  |                              |                    |                  |  |
|                             | Hepatitis. YES vs NO             | 0.895                    | 0.464-1.727  | 0.741  |                              |                    |                  |  |
|                             | NAFLD,YES vs NO                  | 0.538                    | 0.131-2.206  | 0.389  |                              |                    |                  |  |
|                             | Smoking,YES vs NO                | 0.44                     | 0.158-1.226  | 0.116  |                              |                    |                  |  |
|                             | Liver Cirrhosis,YES vs NO        | 0.133                    | 0.018-1.001  | 0.05   |                              |                    |                  |  |
|                             | Alb                              | 0.88                     | 0.771-1.005  | 0.059  |                              |                    |                  |  |
|                             | Cr                               | 0.996                    | 0.979-1.013  | 0.646  |                              |                    |                  |  |
|                             | PT                               | 0.911                    | 0.861-0.964  | 0.001  | 0.946                        | 0.89-1.006         | 0.079            |  |
|                             | PLT                              | 0.996                    | 0.994-0.998  | <0.001 | 0.998                        | 0.996-1            | 0.026            |  |
|                             | AFP                              | 1                        | 1-1          | 0.413  |                              |                    |                  |  |

**S10. Pan-cancer cox results of Hypoxia-TME classifier with overall survival (32 cohorts)**

| <b>Characteristics</b> | <b>HR</b> | <b>95%CI</b> | <b>P.value</b> | <b>coeff</b> | <b>se</b> | <b>number</b> |
|------------------------|-----------|--------------|----------------|--------------|-----------|---------------|
| TCGA-KICH              | 8.162     | 1.961-33.963 | 0.004          | 2.099        | 0.727     | 64            |
| TCGA-PCPG              | 2.735     | 0.738-10.134 | 0.132          | 1.006        | 0.668     | 175           |
| TCGA-ACC               | 2.026     | 1.253-3.277  | 0.004          | 0.706        | 0.245     | 79            |
| TCGA-MESO              | 1.781     | 1.243-2.551  | 0.002          | 0.577        | 0.183     | 79            |
| TCGA-LIHC              | 1.776     | 1.417-2.227  | <0.001         | 0.575        | 0.115     | 363           |
| TCGA-PRAD              | 1.698     | 0.669-4.311  | 0.266          | 0.529        | 0.475     | 481           |
| TCGA-CESC              | 1.525     | 1.102-2.11   | 0.011          | 0.422        | 0.166     | 283           |
| TCGA-LUAD              | 1.419     | 1.179-1.707  | <0.001         | 0.35         | 0.095     | 497           |
| TCGA-UCEC              | 1.404     | 1.057-1.865  | 0.019          | 0.339        | 0.145     | 533           |
| TCGA-SARC              | 1.402     | 1.099-1.789  | 0.007          | 0.338        | 0.124     | 255           |
| TCGA-CHOL              | 1.311     | 0.678-2.538  | 0.421          | 0.271        | 0.337     | 36            |
| TCGA-PAAD              | 1.303     | 1.012-1.676  | 0.04           | 0.264        | 0.129     | 176           |
| TCGA-THCA              | 1.256     | 0.642-2.458  | 0.506          | 0.228        | 0.342     | 496           |
| TCGA-BLCA              | 1.18      | 0.974-1.429  | 0.091          | 0.165        | 0.098     | 400           |
| TCGA-HNSC              | 1.171     | 0.994-1.381  | 0.059          | 0.158        | 0.084     | 494           |
| TCGA-BRCA              | 1.158     | 0.946-1.418  | 0.155          | 0.147        | 0.103     | 1050          |
| TCGA-COAD              | 1.133     | 0.87-1.476   | 0.354          | 0.125        | 0.135     | 430           |
| TCGA-DLBC              | 1.119     | 0.493-2.541  | 0.788          | 0.112        | 0.418     | 46            |
| TCGA-KIRC              | 1.045     | 0.847-1.29   | 0.68           | 0.044        | 0.107     | 522           |
| TCGA-OV                | 1.016     | 0.856-1.206  | 0.857          | 0.016        | 0.088     | 353           |
| TCGA-READ              | 0.995     | 0.6-1.649    | 0.983          | -0.005       | 0.258     | 154           |
| TCGA-SKCM              | 0.983     | 0.628-1.539  | 0.94           | -0.017       | 0.229     | 98            |
| TCGA-KIRP              | 0.982     | 0.665-1.452  | 0.929          | -0.018       | 0.199     | 284           |
| TCGA-STAD              | 0.96      | 0.791-1.166  | 0.681          | -0.041       | 0.099     | 348           |
| TCGA-ESCA              | 0.96      | 0.699-1.319  | 0.803          | -0.04        | 0.162     | 151           |
| TCGA-LUSC              | 0.928     | 0.783-1.099  | 0.386          | -0.075       | 0.086     | 489           |
| TCGA-GBM               | 0.894     | 0.706-1.133  | 0.353          | -0.112       | 0.121     | 143           |
| TCGA-LGG               | 0.829     | 0.665-1.033  | 0.095          | -0.187       | 0.112     | 495           |
| TCGA-UVM               | 0.778     | 0.42-1.439   | 0.423          | -0.251       | 0.314     | 77            |
| TCGA-UCS               | 0.728     | 0.461-1.15   | 0.174          | -0.317       | 0.233     | 54            |
| TCGA-TGCT              | 0.562     | 0.138-2.281  | 0.42           | -0.577       | 0.715     | 133           |
| TCGA-THYM              | 0.318     | 0.12-0.846   | 0.022          | -1.145       | 0.499     | 118           |

S11. The KEGG pathway analysis of High hypoxia score vs Low hypoxia score in HBV-related HCC cohorts

| Cohorts  | ID       | Description                                                   | setSize | enrichment Score | NES     | pvalue | p.adjust | qvalues | rank |
|----------|----------|---------------------------------------------------------------|---------|------------------|---------|--------|----------|---------|------|
| GSE14520 | hsa04110 | Cell cycle                                                    | 114     | 0.645            | 2.372   | 0.003  | 0.012    | 0.007   | 1764 |
| GSE14520 | hsa03030 | DNA replication                                               | 34      | 0.621            | 1.846   | 0.002  | 0.011    | 0.007   | 2996 |
| GSE14520 | hsa03010 | Ribosome                                                      | 99      | 0.568            | 2.067   | 0.003  | 0.012    | 0.007   | 2609 |
| GSE14520 | hsa03040 | Spliceosome                                                   | 102     | 0.559            | 2.030   | 0.003  | 0.012    | 0.007   | 2355 |
| GSE14520 | hsa03013 | RNA transport                                                 | 127     | 0.496            | 1.858   | 0.003  | 0.012    | 0.007   | 3191 |
| GSE14520 | hsa04512 | ECM-receptor interaction                                      | 79      | 0.493            | 1.712   | 0.002  | 0.012    | 0.007   | 1793 |
| GSE14520 | hsa04115 | p53 signaling pathway                                         | 64      | 0.484            | 1.623   | 0.005  | 0.019    | 0.012   | 1591 |
| GSE14520 | hsa04350 | TGF-beta signaling pathway                                    | 84      | 0.473            | 1.659   | 0.005  | 0.019    | 0.012   | 2558 |
| GSE14520 | hsa04218 | Cellular senescence                                           | 145     | 0.437            | 1.674   | 0.003  | 0.012    | 0.008   | 1832 |
| GSE14520 | hsa03008 | Ribosome biogenesis in eukaryotes                             | 56      | 0.434            | 1.425   | 0.034  | 0.096    | 0.062   | 2847 |
| GSE14520 | hsa03018 | RNA degradation                                               | 57      | 0.432            | 1.419   | 0.027  | 0.078    | 0.051   | 2123 |
| GSE14520 | hsa04390 | Hippo signaling pathway                                       | 130     | 0.420            | 1.573   | 0.005  | 0.019    | 0.013   | 3051 |
| GSE14520 | hsa04066 | HIF-1 signaling pathway                                       | 104     | 0.408            | 1.483   | 0.005  | 0.019    | 0.013   | 1826 |
| GSE14520 | hsa04145 | Phagosome                                                     | 132     | 0.405            | 1.522   | 0.005  | 0.019    | 0.013   | 1346 |
| GSE14520 | hsa04114 | Oocyte meiosis                                                | 96      | 0.383            | 1.379   | 0.025  | 0.075    | 0.049   | 1413 |
| GSE14520 | hsa04061 | Viral protein interaction with cytokine and cytokine receptor | 86      | 0.371            | 1.305   | 0.056  | 0.140    | 0.091   | 1156 |
| GSE14520 | hsa04510 | Focal adhesion                                                | 184     | 0.367            | 1.448   | 0.006  | 0.020    | 0.013   | 2251 |
| GSE14520 | hsa04120 | Ubiquitin mediated proteolysis                                | 116     | 0.345            | 1.277   | 0.065  | 0.153    | 0.099   | 2391 |
| GSE14520 | hsa04310 | Wnt signaling pathway                                         | 131     | 0.339            | 1.272   | 0.043  | 0.118    | 0.077   | 3199 |
| GSE14520 | hsa04062 | Chemokine signaling pathway                                   | 164     | 0.317            | 1.235   | 0.048  | 0.126    | 0.082   | 2626 |
| GSE14520 | hsa04360 | Axon guidance                                                 | 154     | 0.309            | 1.195   | 0.070  | 0.162    | 0.105   | 2797 |
| GSE14520 | hsa04015 | Rap1 signaling pathway                                        | 189     | 0.302            | 1.199   | 0.089  | 0.196    | 0.128   | 2810 |
| GSE14520 | hsa04060 | Cytokine-cytokine receptor interaction                        | 245     | 0.300            | 1.217   | 0.056  | 0.140    | 0.091   | 2348 |
| GSE14520 | hsa04211 | Longevity regulating pathway                                  | 77      | (0.424)          | (1.370) | 0.058  | 0.141    | 0.092   | 1339 |
| GSE14520 | hsa04068 | FoxO signaling pathway                                        | 120     | (0.441)          | (1.516) | 0.005  | 0.019    | 0.012   | 1458 |
| GSE14520 | hsa00564 | Glycerophospholipid metabolism                                | 71      | (0.454)          | (1.446) | 0.035  | 0.096    | 0.062   | 1864 |
| GSE14520 | hsa04213 | Longevity regulating pathway - multiple species               | 53      | (0.459)          | (1.396) | 0.053  | 0.136    | 0.088   | 1339 |
| GSE14520 | hsa04152 | AMPK signaling pathway                                        | 105     | (0.501)          | (1.700) | 0.002  | 0.010    | 0.007   | 1339 |
| GSE14520 | hsa01230 | Biosynthesis of amino acids                                   | 63      | (0.505)          | (1.590) | 0.014  | 0.042    | 0.027   | 675  |
| GSE14520 | hsa00500 | Starch and sucrose metabolism                                 | 28      | (0.534)          | (1.447) | 0.059  | 0.141    | 0.092   | 1026 |
| GSE14520 | hsa00010 | Glycolysis / Gluconeogenesis                                  | 60      | (0.536)          | (1.675) | 0.007  | 0.024    | 0.015   | 1067 |
| GSE14520 | hsa01200 | Carbon metabolism                                             | 105     | (0.552)          | (1.874) | 0.002  | 0.010    | 0.007   | 779  |
| GSE14520 | hsa00760 | Nicotinate and nicotinamide metabolism                        | 25      | (0.555)          | (1.475) | 0.046  | 0.123    | 0.080   | 1427 |
| GSE14520 | hsa02010 | ABC transporters                                              | 37      | (0.568)          | (1.619) | 0.011  | 0.034    | 0.022   | 1001 |
| GSE14520 | hsa00561 | Glycerolipid metabolism                                       | 46      | (0.574)          | (1.702) | 0.006  | 0.020    | 0.013   | 1739 |
| GSE14520 | hsa01040 | Biosynthesis of unsaturated fatty acids                       | 19      | (0.590)          | (1.459) | 0.071  | 0.162    | 0.105   | 1259 |
| GSE14520 | hsa00790 | Folate biosynthesis                                           | 22      | (0.604)          | (1.550) | 0.034  | 0.096    | 0.062   | 1523 |
| GSE14520 | hsa00310 | Lysine degradation                                            | 49      | (0.612)          | (1.841) | 0.002  | 0.010    | 0.007   | 923  |
| GSE14520 | hsa00250 | Alanine, aspartate and glutamate metabolism                   | 28      | (0.617)          | (1.672) | 0.007  | 0.024    | 0.016   | 776  |
| GSE14520 | hsa00330 | Arginine and proline metabolism                               | 38      | (0.621)          | (1.786) | 0.004  | 0.015    | 0.010   | 909  |
| GSE14520 | hsa01210 | 2-Oxocarboxylic acid metabolism                               | 13      | (0.631)          | (1.466) | 0.064  | 0.151    | 0.098   | 2035 |
| GSE14520 | hsa00860 | Porphyrin and chlorophyll metabolism                          | 25      | (0.635)          | (1.686) | 0.009  | 0.030    | 0.019   | 432  |
| GSE14520 | hsa00983 | Drug metabolism - other enzymes                               | 54      | (0.644)          | (1.967) | 0.002  | 0.010    | 0.007   | 1750 |
| GSE14520 | hsa00270 | Cysteine and methionine metabolism                            | 43      | (0.648)          | (1.929) | 0.002  | 0.010    | 0.007   | 613  |
| GSE14520 | hsa01212 | Fatty acid metabolism                                         | 47      | (0.651)          | (1.941) | 0.002  | 0.010    | 0.007   | 1370 |
| GSE14520 | hsa00590 | Arachidonic acid metabolism                                   | 48      | (0.654)          | (1.958) | 0.002  | 0.010    | 0.007   | 519  |
| GSE14520 | hsa00920 | Sulfur metabolism                                             | 10      | (0.664)          | (1.443) | 0.085  | 0.190    | 0.124   | 961  |
| GSE14520 | hsa00620 | Pyruvate metabolism                                           | 34      | (0.680)          | (1.926) | 0.002  | 0.010    | 0.007   | 709  |
| GSE14520 | hsa00020 | Citrate cycle (TCA cycle)                                     | 29      | (0.683)          | (1.875) | 0.002  | 0.010    | 0.007   | 1896 |
| GSE14520 | hsa03320 | PPAR signaling pathway                                        | 66      | (0.687)          | (2.174) | 0.002  | 0.010    | 0.007   | 651  |
| GSE14520 | hsa00040 | Pentose and glucuronate interconversions                      | 17      | (0.722)          | (1.746) | 0.012  | 0.036    | 0.023   | 852  |
| GSE14520 | hsa04146 | Peroxisome                                                    | 71      | (0.757)          | (2.413) | 0.002  | 0.010    | 0.007   | 1171 |
| GSE14520 | hsa00640 | Propanoate metabolism                                         | 30      | (0.778)          | (2.154) | 0.002  | 0.010    | 0.007   | 920  |
| GSE14520 | hsa00630 | Glyoxylate and dicarboxylate metabolism                       | 24      | (0.786)          | (2.052) | 0.002  | 0.010    | 0.007   | 621  |
| GSE14520 | hsa00360 | Phenylalanine metabolism                                      | 15      | (0.801)          | (1.902) | 0.002  | 0.010    | 0.007   | 1067 |
| GSE14520 | hsa00410 | beta-Alanine metabolism                                       | 28      | (0.806)          | (2.184) | 0.002  | 0.010    | 0.007   | 1476 |
| GSE14520 | hsa00220 | Arginine biosynthesis                                         | 17      | (0.810)          | (1.960) | 0.002  | 0.010    | 0.007   | 567  |
| GSE14520 | hsa00280 | Valine, leucine and isoleucine degradation                    | 42      | (0.817)          | (2.419) | 0.002  | 0.010    | 0.007   | 1361 |
| GSE14520 | hsa00980 | Metabolism of xenobiotics by cytochrome P450                  | 51      | (0.818)          | (2.483) | 0.002  | 0.010    | 0.007   | 1157 |
| GSE14520 | hsa00340 | Histidine metabolism                                          | 18      | (0.820)          | (2.001) | 0.002  | 0.010    | 0.007   | 1476 |
| GSE14520 | hsa00982 | Drug metabolism - cytochrome P450                             | 49      | (0.821)          | (2.471) | 0.002  | 0.010    | 0.007   | 1157 |
| GSE14520 | hsa00650 | Butanoate metabolism                                          | 23      | (0.824)          | (2.122) | 0.002  | 0.010    | 0.007   | 1031 |
| GSE14520 | hsa00260 | Glycine, serine and threonine metabolism                      | 33      | (0.824)          | (2.324) | 0.002  | 0.010    | 0.007   | 909  |
| GSE14520 | hsa00591 | Linoleic acid metabolism                                      | 20      | (0.832)          | (2.072) | 0.002  | 0.010    | 0.007   | 307  |
| GSE14520 | hsa00350 | Tyrosine metabolism                                           | 32      | (0.841)          | (2.356) | 0.002  | 0.010    | 0.007   | 659  |
| GSE14520 | hsa00053 | Ascorbate and aldarate metabolism                             | 12      | (0.847)          | (1.913) | 0.002  | 0.010    | 0.007   | 709  |
| GSE14520 | hsa00140 | Steroid hormone biosynthesis                                  | 43      | (0.850)          | (2.532) | 0.002  | 0.010    | 0.007   | 855  |
| GSE14520 | hsa00380 | Tryptophan metabolism                                         | 34      | (0.852)          | (2.414) | 0.002  | 0.010    | 0.007   | 709  |
| GSE14520 | hsa00071 | Fatty acid degradation                                        | 40      | (0.853)          | (2.485) | 0.002  | 0.010    | 0.007   | 775  |



S11. The KEGG pathway analysis of High hypoxia score vs Low hypoxia score in HBV-related HCC cohorts

| Cohorts  | ID       | Description                                                   | setSize | enrichment Score | NES     | pvalue | p.adjust | qvalues | rank |
|----------|----------|---------------------------------------------------------------|---------|------------------|---------|--------|----------|---------|------|
| GSE14520 | hsa00830 | Retinol metabolism                                            | 39      | (0.863)          | (2.498) | 0.002  | 0.010    | 0.007   | 1047 |
| GSE14520 | hsa00120 | Primary bile acid biosynthesis                                | 15      | (0.918)          | (2.177) | 0.002  | 0.010    | 0.007   | 520  |
| TCGA     | hsa03010 | Ribosome                                                      | 134     | 0.763            | 2.675   | 0.003  | 0.012    | 0.007   | 2028 |
| TCGA     | hsa03030 | DNA replication                                               | 36      | 0.690            | 1.909   | 0.002  | 0.012    | 0.007   | 3103 |
| TCGA     | hsa03040 | Spliceosome                                                   | 131     | 0.627            | 2.202   | 0.003  | 0.012    | 0.007   | 4496 |
| TCGA     | hsa04110 | Cell cycle                                                    | 124     | 0.624            | 2.168   | 0.003  | 0.012    | 0.007   | 2258 |
| TCGA     | hsa03430 | Mismatch repair                                               | 23      | 0.549            | 1.372   | 0.075  | 0.146    | 0.083   | 2834 |
| TCGA     | hsa03008 | Ribosome biogenesis in eukaryotes                             | 72      | 0.549            | 1.769   | 0.002  | 0.012    | 0.007   | 3308 |
| TCGA     | hsa04512 | ECM-receptor interaction                                      | 87      | 0.537            | 1.777   | 0.003  | 0.012    | 0.007   | 1528 |
| TCGA     | hsa03020 | RNA polymerase                                                | 31      | 0.524            | 1.413   | 0.051  | 0.109    | 0.062   | 4517 |
| TCGA     | hsa03050 | Proteasome                                                    | 44      | 0.523            | 1.515   | 0.021  | 0.055    | 0.031   | 4747 |
| TCGA     | hsa04145 | Phagosome                                                     | 148     | 0.520            | 1.855   | 0.003  | 0.012    | 0.007   | 2613 |
| TCGA     | hsa03440 | Homologous recombination                                      | 37      | 0.509            | 1.412   | 0.057  | 0.121    | 0.069   | 6374 |
| TCGA     | hsa03013 | RNA transport                                                 | 157     | 0.496            | 1.775   | 0.003  | 0.012    | 0.007   | 4408 |
| TCGA     | hsa03015 | mRNA surveillance pathway                                     | 90      | 0.496            | 1.650   | 0.003  | 0.012    | 0.007   | 4764 |
| TCGA     | hsa04390 | Hippo signaling pathway                                       | 154     | 0.483            | 1.730   | 0.003  | 0.012    | 0.007   | 3355 |
| TCGA     | hsa04066 | HIF-1 signaling pathway                                       | 107     | 0.455            | 1.563   | 0.003  | 0.012    | 0.007   | 895  |
| TCGA     | hsa04380 | Osteoclast differentiation                                    | 124     | 0.454            | 1.576   | 0.003  | 0.012    | 0.007   | 3197 |
| TCGA     | hsa04218 | Cellular senescence                                           | 157     | 0.443            | 1.585   | 0.003  | 0.012    | 0.007   | 2642 |
| TCGA     | hsa03460 | Fanconi anemia pathway                                        | 49      | 0.435            | 1.293   | 0.093  | 0.170    | 0.097   | 3411 |
| TCGA     | hsa04144 | Endocytosis                                                   | 237     | 0.430            | 1.604   | 0.003  | 0.012    | 0.007   | 4757 |
| TCGA     | hsa04510 | Focal adhesion                                                | 196     | 0.421            | 1.545   | 0.006  | 0.020    | 0.012   | 3752 |
| TCGA     | hsa04260 | Cardiac muscle contraction                                    | 82      | 0.415            | 1.355   | 0.026  | 0.063    | 0.036   | 2428 |
| TCGA     | hsa03018 | RNA degradation                                               | 75      | 0.402            | 1.306   | 0.060  | 0.122    | 0.069   | 4530 |
| TCGA     | hsa04115 | p53 signaling pathway                                         | 70      | 0.402            | 1.286   | 0.074  | 0.146    | 0.083   | 2532 |
| TCGA     | hsa04064 | NF-kappa B signaling pathway                                  | 102     | 0.399            | 1.362   | 0.026  | 0.064    | 0.036   | 3022 |
| TCGA     | hsa04061 | Viral protein interaction with cytokine and cytokine receptor | 98      | 0.396            | 1.336   | 0.038  | 0.086    | 0.049   | 4227 |
| TCGA     | hsa04114 | Oocyte meiosis                                                | 123     | 0.396            | 1.370   | 0.020  | 0.054    | 0.031   | 1854 |
| TCGA     | hsa04350 | TGF-beta signaling pathway                                    | 92      | 0.378            | 1.263   | 0.060  | 0.122    | 0.069   | 5214 |
| TCGA     | hsa04210 | Apoptosis                                                     | 134     | 0.368            | 1.291   | 0.041  | 0.093    | 0.053   | 2148 |
| TCGA     | hsa04514 | Cell adhesion molecules (CAMs)                                | 138     | 0.364            | 1.283   | 0.047  | 0.103    | 0.059   | 2913 |
| TCGA     | hsa04060 | Cytokine-cytokine receptor interaction                        | 289     | 0.360            | 1.366   | 0.007  | 0.022    | 0.013   | 3322 |
| TCGA     | hsa04015 | Rap1 signaling pathway                                        | 207     | 0.359            | 1.324   | 0.010  | 0.028    | 0.016   | 3825 |
| TCGA     | hsa04217 | Necroptosis                                                   | 132     | 0.355            | 1.236   | 0.075  | 0.146    | 0.083   | 3627 |
| TCGA     | hsa04062 | Chemokine signaling pathway                                   | 185     | 0.349            | 1.275   | 0.034  | 0.080    | 0.045   | 4311 |
| TCGA     | hsa04310 | Wnt signaling pathway                                         | 158     | 0.342            | 1.222   | 0.077  | 0.147    | 0.084   | 2807 |
| TCGA     | hsa04151 | PI3K-Akt signaling pathway                                    | 351     | 0.337            | 1.315   | 0.011  | 0.031    | 0.018   | 2026 |
| TCGA     | hsa04270 | Vascular smooth muscle contraction                            | 130     | (0.406)          | (1.295) | 0.047  | 0.103    | 0.059   | 3388 |
| TCGA     | hsa04068 | FoxO signaling pathway                                        | 130     | (0.438)          | (1.397) | 0.015  | 0.041    | 0.023   | 2520 |
| TCGA     | hsa04152 | AMPK signaling pathway                                        | 120     | (0.515)          | (1.625) | 0.002  | 0.011    | 0.006   | 2544 |
| TCGA     | hsa04213 | Longevity regulating pathway - multiple species               | 62      | (0.519)          | (1.481) | 0.022  | 0.057    | 0.033   | 2520 |
| TCGA     | hsa00500 | Starch and sucrose metabolism                                 | 34      | (0.564)          | (1.453) | 0.039  | 0.089    | 0.050   | 1246 |
| TCGA     | hsa01230 | Biosynthesis of amino acids                                   | 72      | (0.570)          | (1.675) | 0.003  | 0.012    | 0.007   | 731  |
| TCGA     | hsa01040 | Biosynthesis of unsaturated fatty acids                       | 23      | (0.571)          | (1.366) | 0.093  | 0.170    | 0.097   | 1674 |
| TCGA     | hsa01200 | Carbon metabolism                                             | 114     | (0.582)          | (1.831) | 0.002  | 0.011    | 0.006   | 1626 |
| TCGA     | hsa00010 | Glycolysis / Gluconeogenesis                                  | 67      | (0.596)          | (1.737) | 0.003  | 0.012    | 0.007   | 1152 |
| TCGA     | hsa00330 | Arginine and proline metabolism                               | 48      | (0.600)          | (1.643) | 0.010  | 0.029    | 0.017   | 1082 |
| TCGA     | hsa00900 | Terpenoid backbone biosynthesis                               | 22      | (0.619)          | (1.467) | 0.058  | 0.121    | 0.069   | 3141 |
| TCGA     | hsa00561 | Glycerolipid metabolism                                       | 52      | (0.621)          | (1.714) | 0.007  | 0.021    | 0.012   | 2122 |
| TCGA     | hsa00670 | One carbon pool by folate                                     | 19      | (0.623)          | (1.414) | 0.083  | 0.156    | 0.089   | 940  |
| TCGA     | hsa00270 | Cysteine and methionine metabolism                            | 46      | (0.627)          | (1.692) | 0.005  | 0.017    | 0.010   | 829  |
| TCGA     | hsa00760 | Nicotinate and nicotinamide metabolism                        | 37      | (0.628)          | (1.660) | 0.009  | 0.025    | 0.014   | 2382 |
| TCGA     | hsa01212 | Fatty acid metabolism                                         | 52      | (0.631)          | (1.740) | 0.005  | 0.017    | 0.010   | 1994 |
| TCGA     | hsa00061 | Fatty acid biosynthesis                                       | 17      | (0.633)          | (1.407) | 0.086  | 0.160    | 0.091   | 1994 |
| TCGA     | hsa02010 | ABC transporters                                              | 45      | (0.634)          | (1.709) | 0.003  | 0.012    | 0.007   | 1117 |
| TCGA     | hsa00590 | Arachidonic acid metabolism                                   | 61      | (0.646)          | (1.844) | 0.003  | 0.012    | 0.007   | 503  |
| TCGA     | hsa00310 | Lysine degradation                                            | 56      | (0.648)          | (1.814) | 0.002  | 0.011    | 0.006   | 995  |
| TCGA     | hsa00790 | Folate biosynthesis                                           | 24      | (0.650)          | (1.571) | 0.024  | 0.060    | 0.034   | 919  |
| TCGA     | hsa00250 | Alanine, aspartate and glutamate metabolism                   | 34      | (0.678)          | (1.747) | 0.005  | 0.017    | 0.010   | 881  |
| TCGA     | hsa00860 | Porphyry and chlorophyll metabolism                           | 41      | (0.689)          | (1.842) | 0.002  | 0.011    | 0.006   | 1971 |
| TCGA     | hsa00020 | Citrate cycle (TCA cycle)                                     | 30      | (0.693)          | (1.730) | 0.004  | 0.013    | 0.007   | 1867 |
| TCGA     | hsa00983 | Drug metabolism - other enzymes                               | 77      | (0.702)          | (2.092) | 0.002  | 0.011    | 0.006   | 817  |
| TCGA     | hsa01210 | 2-Oxocarboxylic acid metabolism                               | 18      | (0.703)          | (1.567) | 0.028  | 0.066    | 0.037   | 665  |
| TCGA     | hsa00430 | Taurine and hypotaurine metabolism                            | 11      | (0.711)          | (1.440) | 0.061  | 0.122    | 0.069   | 315  |
| TCGA     | hsa00620 | Pyruvate metabolism                                           | 39      | (0.722)          | (1.913) | 0.002  | 0.011    | 0.006   | 1135 |
| TCGA     | hsa03320 | PPAR signaling pathway                                        | 76      | (0.757)          | (2.254) | 0.002  | 0.011    | 0.006   | 1054 |
| TCGA     | hsa04146 | Peroxisome                                                    | 82      | (0.766)          | (2.303) | 0.002  | 0.011    | 0.006   | 1277 |
| TCGA     | hsa00040 | Pentose and glucuronate interconversions                      | 33      | (0.772)          | (1.972) | 0.002  | 0.011    | 0.006   | 944  |

**S11. The KEGG pathway analysis of High hypoxia score vs Low hypoxia score in HBV-related HCC cohorts**

| Cohorts | ID       | Description                                         | setSize | enrichment Score | NES     | pvalue | p.adjust | qvalues | rank |
|---------|----------|-----------------------------------------------------|---------|------------------|---------|--------|----------|---------|------|
| TCGA    | hsa00130 | Ubiquinone and other terpenoid-quinone biosynthesis | 11      | (0.775)          | (1.570) | 0.025  | 0.063    | 0.036   | 2179 |
| TCGA    | hsa00360 | Phenylalanine metabolism                            | 17      | (0.789)          | (1.755) | 0.007  | 0.022    | 0.013   | 1106 |
| TCGA    | hsa00640 | Propanoate metabolism                               | 33      | (0.790)          | (2.018) | 0.002  | 0.011    | 0.006   | 1173 |
| TCGA    | hsa00630 | Glyoxylate and dicarboxylate metabolism             | 29      | (0.797)          | (1.958) | 0.002  | 0.011    | 0.006   | 1050 |
| TCGA    | hsa00280 | Valine, leucine and isoleucine degradation          | 47      | (0.814)          | (2.212) | 0.002  | 0.011    | 0.006   | 2040 |
| TCGA    | hsa00410 | beta-Alanine metabolism                             | 31      | (0.819)          | (2.061) | 0.002  | 0.011    | 0.006   | 946  |
| TCGA    | hsa00350 | Tyrosine metabolism                                 | 36      | (0.820)          | (2.157) | 0.002  | 0.011    | 0.006   | 1353 |
| TCGA    | hsa00260 | Glycine, serine and threonine metabolism            | 38      | (0.822)          | (2.183) | 0.002  | 0.011    | 0.006   | 2001 |
| TCGA    | hsa00340 | Histidine metabolism                                | 22      | (0.834)          | (1.974) | 0.002  | 0.011    | 0.006   | 1793 |
| TCGA    | hsa00220 | Arginine biosynthesis                               | 21      | (0.834)          | (1.956) | 0.002  | 0.011    | 0.006   | 731  |
| TCGA    | hsa00140 | Steroid hormone biosynthesis                        | 59      | (0.841)          | (2.387) | 0.002  | 0.011    | 0.006   | 1022 |
| TCGA    | hsa00072 | Synthesis and degradation of ketone bodies          | 10      | (0.842)          | (1.683) | 0.014  | 0.037    | 0.021   | 1623 |
| TCGA    | hsa00980 | Metabolism of xenobiotics by cytochrome P450        | 71      | (0.844)          | (2.483) | 0.002  | 0.011    | 0.006   | 699  |
| TCGA    | hsa00380 | Tryptophan metabolism                               | 40      | (0.845)          | (2.252) | 0.002  | 0.011    | 0.006   | 1685 |
| TCGA    | hsa00982 | Drug metabolism - cytochrome P450                   | 67      | (0.854)          | (2.489) | 0.002  | 0.011    | 0.006   | 699  |
| TCGA    | hsa00591 | Linoleic acid metabolism                            | 28      | (0.854)          | (2.094) | 0.002  | 0.011    | 0.006   | 503  |
| TCGA    | hsa00053 | Ascorbate and aldarate metabolism                   | 27      | (0.856)          | (2.085) | 0.002  | 0.011    | 0.006   | 946  |
| TCGA    | hsa00071 | Fatty acid degradation                              | 44      | (0.867)          | (2.328) | 0.002  | 0.011    | 0.006   | 1353 |
| TCGA    | hsa00650 | Butanoate metabolism                                | 28      | (0.883)          | (2.164) | 0.002  | 0.011    | 0.006   | 760  |
| TCGA    | hsa00830 | Retinol metabolism                                  | 65      | (0.884)          | (2.560) | 0.002  | 0.011    | 0.006   | 699  |
| TCGA    | hsa00120 | Primary bile acid biosynthesis                      | 17      | (0.929)          | (2.064) | 0.002  | 0.011    | 0.006   | 865  |
| Fudan   | hsa03030 | DNA replication                                     | 22      | 0.719            | 2.099   | 0.002  | 0.008    | 0.005   | 1201 |
| Fudan   | hsa04080 | Neuroactive ligand-receptor interaction             | 13      | 0.689            | 1.755   | 0.002  | 0.008    | 0.005   | 719  |
| Fudan   | hsa04145 | Phagosome                                           | 95      | 0.635            | 2.436   | 0.002  | 0.008    | 0.005   | 1277 |
| Fudan   | hsa04066 | HIF-1 signaling pathway                             | 65      | 0.592            | 2.147   | 0.002  | 0.008    | 0.005   | 541  |
| Fudan   | hsa04216 | Ferroptosis                                         | 28      | 0.554            | 1.716   | 0.010  | 0.027    | 0.017   | 582  |
| Fudan   | hsa04512 | ECM-receptor interaction                            | 46      | 0.545            | 1.849   | 0.002  | 0.008    | 0.005   | 1390 |
| Fudan   | hsa04380 | Osteoclast differentiation                          | 53      | 0.542            | 1.877   | 0.002  | 0.008    | 0.005   | 1196 |
| Fudan   | hsa04514 | Cell adhesion molecules (CAMs)                      | 51      | 0.537            | 1.853   | 0.002  | 0.008    | 0.005   | 918  |
| Fudan   | hsa03008 | Ribosome biogenesis in eukaryotes                   | 61      | 0.514            | 1.826   | 0.004  | 0.014    | 0.008   | 2157 |
| Fudan   | hsa04110 | Cell cycle                                          | 58      | 0.477            | 1.675   | 0.010  | 0.029    | 0.017   | 2266 |
| Fudan   | hsa04142 | Lysosome                                            | 81      | 0.469            | 1.759   | 0.004  | 0.014    | 0.008   | 1765 |
| Fudan   | hsa04015 | Rap1 signaling pathway                              | 88      | 0.442            | 1.680   | 0.006  | 0.019    | 0.011   | 792  |
| Fudan   | hsa04062 | Chemokine signaling pathway                         | 79      | 0.430            | 1.603   | 0.012  | 0.034    | 0.020   | 1404 |
| Fudan   | hsa04510 | Focal adhesion                                      | 115     | 0.384            | 1.538   | 0.006  | 0.019    | 0.011   | 1404 |
| Fudan   | hsa04144 | Endocytosis                                         | 158     | 0.374            | 1.563   | 0.002  | 0.008    | 0.005   | 1766 |
| Fudan   | hsa03013 | RNA transport                                       | 116     | 0.356            | 1.430   | 0.014  | 0.038    | 0.023   | 2705 |
| Fudan   | hsa01200 | Carbon metabolism                                   | 105     | (0.387)          | (1.518) | 0.008  | 0.023    | 0.014   | 912  |
| Fudan   | hsa00190 | Oxidative phosphorylation                           | 83      | (0.473)          | (1.784) | 0.002  | 0.008    | 0.005   | 1924 |
| Fudan   | hsa03050 | Proteasome                                          | 41      | (0.529)          | (1.802) | 0.006  | 0.019    | 0.011   | 2687 |
| Fudan   | hsa03320 | PPAR signaling pathway                              | 48      | (0.537)          | (1.875) | 0.002  | 0.008    | 0.005   | 626  |
| Fudan   | hsa00620 | Pyruvate metabolism                                 | 34      | (0.554)          | (1.800) | 0.004  | 0.014    | 0.008   | 732  |
| Fudan   | hsa00983 | Drug metabolism - other enzymes                     | 59      | (0.557)          | (2.026) | 0.002  | 0.008    | 0.005   | 713  |
| Fudan   | hsa00561 | Glycerolipid metabolism                             | 30      | (0.571)          | (1.796) | 0.006  | 0.019    | 0.011   | 1250 |
| Fudan   | hsa00310 | Lysine degradation                                  | 34      | (0.621)          | (2.016) | 0.004  | 0.014    | 0.008   | 728  |
| Fudan   | hsa00340 | Histidine metabolism                                | 18      | (0.636)          | (1.786) | 0.004  | 0.014    | 0.008   | 729  |
| Fudan   | hsa00640 | Propanoate metabolism                               | 30      | (0.644)          | (2.024) | 0.002  | 0.008    | 0.005   | 912  |
| Fudan   | hsa00020 | Citrate cycle (TCA cycle)                           | 28      | (0.658)          | (2.038) | 0.002  | 0.008    | 0.005   | 1772 |
| Fudan   | hsa00670 | One carbon pool by folate                           | 14      | (0.659)          | (1.753) | 0.010  | 0.027    | 0.017   | 850  |
| Fudan   | hsa01212 | Fatty acid metabolism                               | 40      | (0.660)          | (2.232) | 0.002  | 0.008    | 0.005   | 788  |
| Fudan   | hsa00260 | Glycine, serine and threonine metabolism            | 35      | (0.663)          | (2.166) | 0.002  | 0.008    | 0.005   | 871  |
| Fudan   | hsa00450 | Selenocompound metabolism                           | 14      | (0.673)          | (1.790) | 0.006  | 0.019    | 0.011   | 1042 |
| Fudan   | hsa00360 | Phenylalanine metabolism                            | 15      | (0.674)          | (1.822) | 0.002  | 0.008    | 0.005   | 223  |
| Fudan   | hsa02010 | ABC transporters                                    | 25      | (0.675)          | (2.024) | 0.002  | 0.008    | 0.005   | 884  |
| Fudan   | hsa00790 | Folate biosynthesis                                 | 16      | (0.679)          | (1.840) | 0.004  | 0.014    | 0.008   | 1126 |
| Fudan   | hsa00860 | Porphyrin and chlorophyll metabolism                | 29      | (0.689)          | (2.153) | 0.002  | 0.008    | 0.005   | 828  |
| Fudan   | hsa00630 | Glyoxylate and dicarboxylate metabolism             | 29      | (0.691)          | (2.159) | 0.002  | 0.008    | 0.005   | 1361 |
| Fudan   | hsa00350 | Tyrosine metabolism                                 | 25      | (0.692)          | (2.073) | 0.002  | 0.008    | 0.005   | 1023 |
| Fudan   | hsa00220 | Arginine biosynthesis                               | 17      | (0.693)          | (1.901) | 0.002  | 0.008    | 0.005   | 407  |
| Fudan   | hsa00280 | Valine, leucine and isoleucine degradation          | 45      | (0.701)          | (2.424) | 0.002  | 0.008    | 0.005   | 728  |
| Fudan   | hsa00062 | Fatty acid elongation                               | 16      | (0.706)          | (1.913) | 0.002  | 0.008    | 0.005   | 705  |
| Fudan   | hsa00970 | Aminoacyl-tRNA biosynthesis                         | 24      | (0.719)          | (2.136) | 0.002  | 0.008    | 0.005   | 1323 |
| Fudan   | hsa00380 | Tryptophan metabolism                               | 32      | (0.724)          | (2.306) | 0.002  | 0.008    | 0.005   | 783  |
| Fudan   | hsa00980 | Metabolism of xenobiotics by cytochrome P450        | 51      | (0.747)          | (2.633) | 0.002  | 0.008    | 0.005   | 783  |
| Fudan   | hsa00982 | Drug metabolism - cytochrome P450                   | 50      | (0.758)          | (2.676) | 0.002  | 0.008    | 0.005   | 783  |
| Fudan   | hsa04146 | Peroxisome                                          | 72      | (0.760)          | (2.824) | 0.002  | 0.008    | 0.005   | 699  |
| Fudan   | hsa00140 | Steroid hormone biosynthesis                        | 34      | (0.771)          | (2.503) | 0.002  | 0.008    | 0.005   | 836  |
| Fudan   | hsa00650 | Butanoate metabolism                                | 22      | (0.783)          | (2.304) | 0.002  | 0.008    | 0.005   | 350  |
| Fudan   | hsa00071 | Fatty acid degradation                              | 38      | (0.796)          | (2.658) | 0.002  | 0.008    | 0.005   | 788  |

**S11. The KEGG pathway analysis of High hypoxia score vs Low hypoxia score in HBV-related HCC cohorts**

| Cohorts | ID       | Description                              | setSize | enrichment Score | NES     | pvalue | p.adjust | qvalues | rank |
|---------|----------|------------------------------------------|---------|------------------|---------|--------|----------|---------|------|
| Fudan   | hsa00410 | beta-Alanine metabolism                  | 23      | (0.801)          | (2.369) | 0.002  | 0.008    | 0.005   | 788  |
| Fudan   | hsa00040 | Pentose and glucuronate interconversions | 21      | (0.805)          | (2.316) | 0.002  | 0.008    | 0.005   | 814  |
| Fudan   | hsa00830 | Retinol metabolism                       | 39      | (0.806)          | (2.706) | 0.002  | 0.008    | 0.005   | 783  |
| Fudan   | hsa00053 | Ascorbate and aldarate metabolism        | 17      | (0.881)          | (2.418) | 0.002  | 0.008    | 0.005   | 688  |
| Fudan   | hsa00120 | Primary bile acid biosynthesis           | 15      | (0.882)          | (2.383) | 0.002  | 0.008    | 0.005   | 673  |

S12. The KEGG pathway analysis of High TME score vs Low TME score in HBV-related HCC cohorts

| Cohort   | ID       | Description                                                   | setSize | enrichment Score | NES     | pvalue | p.adjust | qvalues | rank |
|----------|----------|---------------------------------------------------------------|---------|------------------|---------|--------|----------|---------|------|
| GSE14520 | hsa00120 | Primary bile acid biosynthesis                                | 15      | 0.882            | 2.201   | 0.002  | 0.008    | 0.004   | 1209 |
| GSE14520 | hsa00830 | Retinol metabolism                                            | 39      | 0.869            | 2.607   | 0.002  | 0.008    | 0.004   | 806  |
| GSE14520 | hsa00380 | Tryptophan metabolism                                         | 34      | 0.865            | 2.554   | 0.002  | 0.008    | 0.004   | 1004 |
| GSE14520 | hsa00650 | Butanoate metabolism                                          | 23      | 0.833            | 2.247   | 0.002  | 0.008    | 0.004   | 779  |
| GSE14520 | hsa00071 | Fatty acid degradation                                        | 40      | 0.830            | 2.490   | 0.002  | 0.008    | 0.004   | 842  |
| GSE14520 | hsa00220 | Arginine biosynthesis                                         | 17      | 0.829            | 2.096   | 0.002  | 0.008    | 0.004   | 1300 |
| GSE14520 | hsa00140 | Steroid hormone biosynthesis                                  | 43      | 0.828            | 2.527   | 0.002  | 0.008    | 0.004   | 1195 |
| GSE14520 | hsa00591 | Linoleic acid metabolism                                      | 20      | 0.827            | 2.156   | 0.002  | 0.008    | 0.004   | 793  |
| GSE14520 | hsa00350 | Tyrosine metabolism                                           | 32      | 0.814            | 2.353   | 0.002  | 0.008    | 0.004   | 895  |
| GSE14520 | hsa00980 | Metabolism of xenobiotics by cytochrome P450                  | 51      | 0.811            | 2.547   | 0.002  | 0.008    | 0.004   | 715  |
| GSE14520 | hsa00053 | Ascorbate and aldarate metabolism                             | 12      | 0.811            | 1.909   | 0.006  | 0.016    | 0.009   | 842  |
| GSE14520 | hsa00340 | Histidine metabolism                                          | 18      | 0.808            | 2.076   | 0.002  | 0.008    | 0.004   | 1714 |
| GSE14520 | hsa00630 | Glyoxylate and dicarboxylate metabolism                       | 24      | 0.807            | 2.194   | 0.002  | 0.008    | 0.004   | 848  |
| GSE14520 | hsa00982 | Drug metabolism - cytochrome P450                             | 49      | 0.801            | 2.505   | 0.002  | 0.008    | 0.004   | 895  |
| GSE14520 | hsa00360 | Phenylalanine metabolism                                      | 15      | 0.794            | 1.979   | 0.004  | 0.013    | 0.007   | 1747 |
| GSE14520 | hsa00280 | Valine, leucine and isoleucine degradation                    | 42      | 0.793            | 2.407   | 0.002  | 0.008    | 0.004   | 1485 |
| GSE14520 | hsa00410 | beta-Alanine metabolism                                       | 28      | 0.780            | 2.206   | 0.002  | 0.008    | 0.004   | 1747 |
| GSE14520 | hsa00260 | Glycine, serine and threonine metabolism                      | 33      | 0.769            | 2.230   | 0.002  | 0.008    | 0.004   | 1020 |
| GSE14520 | hsa00040 | Pentose and glucuronate interconversions                      | 17      | 0.755            | 1.909   | 0.006  | 0.016    | 0.009   | 919  |
| GSE14520 | hsa00640 | Propanoate metabolism                                         | 30      | 0.754            | 2.159   | 0.002  | 0.008    | 0.004   | 1192 |
| GSE14520 | hsa04146 | Peroxisome                                                    | 71      | 0.700            | 2.310   | 0.002  | 0.008    | 0.004   | 1187 |
| GSE14520 | hsa00590 | Arachidonic acid metabolism                                   | 48      | 0.700            | 2.180   | 0.002  | 0.008    | 0.004   | 2123 |
| GSE14520 | hsa00020 | Citrate cycle (TCA cycle)                                     | 29      | 0.689            | 1.965   | 0.004  | 0.013    | 0.007   | 959  |
| GSE14520 | hsa03320 | PPAR signaling pathway                                        | 66      | 0.686            | 2.242   | 0.002  | 0.008    | 0.004   | 1060 |
| GSE14520 | hsa00760 | Nicotinate and nicotinamide metabolism                        | 25      | 0.675            | 1.854   | 0.006  | 0.016    | 0.009   | 1547 |
| GSE14520 | hsa00860 | Porphyrin and chlorophyll metabolism                          | 25      | 0.668            | 1.836   | 0.006  | 0.016    | 0.009   | 1774 |
| GSE14520 | hsa00620 | Pyruvate metabolism                                           | 34      | 0.641            | 1.891   | 0.002  | 0.008    | 0.004   | 1074 |
| GSE14520 | hsa04061 | Viral protein interaction with cytokine and cytokine receptor | 86      | 0.631            | 2.164   | 0.002  | 0.008    | 0.004   | 1660 |
| GSE14520 | hsa00790 | Folate biosynthesis                                           | 22      | 0.630            | 1.685   | 0.012  | 0.031    | 0.017   | 2374 |
| GSE14520 | hsa02010 | ABC transporters                                              | 37      | 0.630            | 1.876   | 0.002  | 0.008    | 0.004   | 1169 |
| GSE14520 | hsa00983 | Drug metabolism - other enzymes                               | 54      | 0.616            | 1.965   | 0.002  | 0.008    | 0.004   | 655  |
| GSE14520 | hsa00250 | Alanine, aspartate and glutamate metabolism                   | 28      | 0.599            | 1.696   | 0.014  | 0.032    | 0.018   | 1300 |
| GSE14520 | hsa01212 | Fatty acid metabolism                                         | 47      | 0.585            | 1.816   | 0.002  | 0.008    | 0.004   | 1060 |
| GSE14520 | hsa00010 | Glycolysis / Gluconeogenesis                                  | 60      | 0.584            | 1.889   | 0.002  | 0.008    | 0.004   | 1149 |
| GSE14520 | hsa00561 | Glycerolipid metabolism                                       | 46      | 0.584            | 1.803   | 0.004  | 0.013    | 0.007   | 2144 |
| GSE14520 | hsa00500 | Starch and sucrose metabolism                                 | 28      | 0.582            | 1.647   | 0.014  | 0.032    | 0.018   | 1019 |
| GSE14520 | hsa00270 | Cysteine and methionine metabolism                            | 43      | 0.579            | 1.766   | 0.002  | 0.008    | 0.004   | 1074 |
| GSE14520 | hsa01200 | Carbon metabolism                                             | 105     | 0.558            | 1.988   | 0.002  | 0.008    | 0.004   | 968  |
| GSE14520 | hsa00310 | Lysine degradation                                            | 49      | 0.547            | 1.711   | 0.006  | 0.016    | 0.009   | 842  |
| GSE14520 | hsa00330 | Arginine and proline metabolism                               | 38      | 0.536            | 1.601   | 0.019  | 0.043    | 0.024   | 1127 |
| GSE14520 | hsa04514 | Cell adhesion molecules (CAMs)                                | 122     | 0.518            | 1.874   | 0.002  | 0.008    | 0.004   | 1654 |
| GSE14520 | hsa04064 | NF-kappa B signaling pathway                                  | 93      | 0.489            | 1.699   | 0.002  | 0.008    | 0.004   | 2154 |
| GSE14520 | hsa01230 | Biosynthesis of amino acids                                   | 63      | 0.478            | 1.550   | 0.014  | 0.032    | 0.018   | 1031 |
| GSE14520 | hsa00564 | Glycerophospholipid metabolism                                | 71      | 0.467            | 1.539   | 0.011  | 0.029    | 0.016   | 2286 |
| GSE14520 | hsa04062 | Chemokine signaling pathway                                   | 164     | 0.452            | 1.702   | 0.002  | 0.008    | 0.004   | 1897 |
| GSE14520 | hsa04060 | Cytokine-cytokine receptor interaction                        | 245     | 0.438            | 1.733   | 0.002  | 0.008    | 0.004   | 1660 |
| GSE14520 | hsa04145 | Phagosome                                                     | 132     | 0.426            | 1.545   | 0.005  | 0.016    | 0.009   | 1099 |
| GSE14520 | hsa04152 | AMPK signaling pathway                                        | 105     | 0.397            | 1.413   | 0.022  | 0.048    | 0.027   | 1623 |
| GSE14520 | hsa04380 | Osteoclast differentiation                                    | 121     | 0.387            | 1.399   | 0.018  | 0.043    | 0.024   | 3011 |
| GSE14520 | hsa04080 | Neuroactive ligand-receptor interaction                       | 295     | 0.386            | 1.552   | 0.002  | 0.008    | 0.004   | 4013 |
| GSE14520 | hsa04310 | Wnt signaling pathway                                         | 131     | (0.379)          | (1.445) | 0.011  | 0.028    | 0.016   | 3433 |
| GSE14520 | hsa04218 | Cellular senescence                                           | 145     | (0.397)          | (1.525) | 0.002  | 0.008    | 0.004   | 2531 |
| GSE14520 | hsa04390 | Hippo signaling pathway                                       | 130     | (0.429)          | (1.633) | 0.002  | 0.008    | 0.004   | 2430 |
| GSE14520 | hsa04120 | Ubiquitin mediated proteolysis                                | 116     | (0.435)          | (1.628) | 0.004  | 0.013    | 0.007   | 4099 |
| GSE14520 | hsa04115 | p53 signaling pathway                                         | 64      | (0.444)          | (1.510) | 0.008  | 0.022    | 0.012   | 1149 |
| GSE14520 | hsa03018 | RNA degradation                                               | 57      | (0.506)          | (1.666) | 0.004  | 0.013    | 0.007   | 2590 |
| GSE14520 | hsa04114 | Oocyte meiosis                                                | 96      | (0.525)          | (1.906) | 0.002  | 0.008    | 0.004   | 1702 |
| GSE14520 | hsa03022 | Basal transcription factors                                   | 36      | (0.562)          | (1.676) | 0.004  | 0.013    | 0.007   | 3718 |
| GSE14520 | hsa03420 | Nucleotide excision repair                                    | 42      | (0.563)          | (1.752) | 0.002  | 0.008    | 0.004   | 2253 |
| GSE14520 | hsa03015 | mRNA surveillance pathway                                     | 68      | (0.570)          | (1.965) | 0.002  | 0.008    | 0.004   | 3158 |
| GSE14520 | hsa03460 | Fanconi anemia pathway                                        | 38      | (0.573)          | (1.736) | 0.004  | 0.013    | 0.007   | 2467 |
| GSE14520 | hsa03008 | Ribosome biogenesis in eukaryotes                             | 56      | (0.575)          | (1.888) | 0.002  | 0.008    | 0.004   | 2747 |
| GSE14520 | hsa03010 | Ribosome                                                      | 99      | (0.583)          | (2.106) | 0.002  | 0.008    | 0.004   | 2715 |
| GSE14520 | hsa03013 | RNA transport                                                 | 127     | (0.589)          | (2.237) | 0.002  | 0.008    | 0.004   | 2875 |
| GSE14520 | hsa03440 | Homologous recombination                                      | 38      | (0.622)          | (1.885) | 0.002  | 0.008    | 0.004   | 2563 |
| GSE14520 | hsa03040 | Spliceosome                                                   | 102     | (0.660)          | (2.399) | 0.002  | 0.008    | 0.004   | 3010 |
| GSE14520 | hsa03450 | Non-homologous end-joining                                    | 12      | (0.693)          | (1.602) | 0.018  | 0.041    | 0.023   | 2519 |
| GSE14520 | hsa04110 | Cell cycle                                                    | 114     | (0.707)          | (2.636) | 0.002  | 0.008    | 0.004   | 1607 |
| GSE14520 | hsa03430 | Mismatch repair                                               | 22      | (0.723)          | (1.965) | 0.002  | 0.008    | 0.004   | 1449 |
| GSE14520 | hsa03030 | DNA replication                                               | 34      | (0.792)          | (2.327) | 0.002  | 0.008    | 0.004   | 1460 |

S12. The KEGG pathway analysis of High TME score vs Low TME score in HBV-related HCC cohorts

| Cohort    | ID       | Description                                  | setSize | enrichment Score | NES     | pvalue | p.adjust | qvalues | rank |
|-----------|----------|----------------------------------------------|---------|------------------|---------|--------|----------|---------|------|
| Gao et al | hsa00120 | Primary bile acid biosynthesis               | 15      | 0.863            | 2.395   | 0.002  | 0.008    | 0.004   | 652  |
| Gao et al | hsa00410 | beta-Alanine metabolism                      | 23      | 0.815            | 2.544   | 0.002  | 0.008    | 0.004   | 962  |
| Gao et al | hsa00380 | Tryptophan metabolism                        | 32      | 0.811            | 2.694   | 0.002  | 0.008    | 0.004   | 999  |
| Gao et al | hsa00830 | Retinol metabolism                           | 39      | 0.793            | 2.801   | 0.002  | 0.008    | 0.004   | 798  |
| Gao et al | hsa00982 | Drug metabolism - cytochrome P450            | 50      | 0.787            | 2.930   | 0.002  | 0.008    | 0.004   | 575  |
| Gao et al | hsa00140 | Steroid hormone biosynthesis                 | 34      | 0.784            | 2.645   | 0.002  | 0.008    | 0.004   | 798  |
| Gao et al | hsa00980 | Metabolism of xenobiotics by cytochrome P450 | 51      | 0.773            | 2.899   | 0.002  | 0.008    | 0.004   | 552  |
| Gao et al | hsa00053 | Ascorbate and aldarate metabolism            | 17      | 0.772            | 2.213   | 0.002  | 0.008    | 0.004   | 955  |
| Gao et al | hsa00040 | Pentose and glucuronate interconversions     | 21      | 0.772            | 2.350   | 0.002  | 0.008    | 0.004   | 350  |
| Gao et al | hsa00640 | Propanoate metabolism                        | 30      | 0.759            | 2.498   | 0.002  | 0.008    | 0.004   | 920  |
| Gao et al | hsa00071 | Fatty acid degradation                       | 38      | 0.756            | 2.673   | 0.002  | 0.008    | 0.004   | 1003 |
| Gao et al | hsa00350 | Tyrosine metabolism                          | 25      | 0.729            | 2.306   | 0.002  | 0.008    | 0.004   | 984  |
| Gao et al | hsa02010 | ABC transporters                             | 25      | 0.728            | 2.304   | 0.002  | 0.008    | 0.004   | 556  |
| Gao et al | hsa00591 | Linoleic acid metabolism                     | 10      | 0.717            | 1.774   | 0.017  | 0.045    | 0.025   | 625  |
| Gao et al | hsa04146 | Peroxisome                                   | 72      | 0.714            | 2.855   | 0.002  | 0.008    | 0.004   | 1333 |
| Gao et al | hsa00020 | Citrate cycle (TCA cycle)                    | 28      | 0.707            | 2.308   | 0.002  | 0.008    | 0.004   | 1724 |
| Gao et al | hsa00650 | Butanoate metabolism                         | 22      | 0.696            | 2.140   | 0.002  | 0.008    | 0.004   | 1011 |
| Gao et al | hsa00280 | Valine, leucine and isoleucine degradation   | 45      | 0.695            | 2.513   | 0.002  | 0.008    | 0.004   | 955  |
| Gao et al | hsa00340 | Histidine metabolism                         | 18      | 0.693            | 2.035   | 0.006  | 0.018    | 0.010   | 990  |
| Gao et al | hsa00360 | Phenylalanine metabolism                     | 15      | 0.692            | 1.921   | 0.004  | 0.013    | 0.007   | 984  |
| Gao et al | hsa00860 | Porphyrin and chlorophyll metabolism         | 29      | 0.686            | 2.239   | 0.002  | 0.008    | 0.004   | 825  |
| Gao et al | hsa00220 | Arginine biosynthesis                        | 17      | 0.674            | 1.932   | 0.006  | 0.018    | 0.010   | 1256 |
| Gao et al | hsa00630 | Glyoxylate and dicarboxylate metabolism      | 29      | 0.648            | 2.116   | 0.002  | 0.008    | 0.004   | 999  |
| Gao et al | hsa01212 | Fatty acid metabolism                        | 40      | 0.623            | 2.202   | 0.002  | 0.008    | 0.004   | 762  |
| Gao et al | hsa03320 | PPAR signaling pathway                       | 48      | 0.619            | 2.276   | 0.002  | 0.008    | 0.004   | 1025 |
| Gao et al | hsa00790 | Folate biosynthesis                          | 16      | 0.606            | 1.710   | 0.012  | 0.032    | 0.017   | 829  |
| Gao et al | hsa00310 | Lysine degradation                           | 34      | 0.601            | 2.028   | 0.002  | 0.008    | 0.004   | 955  |
| Gao et al | hsa00500 | Starch and sucrose metabolism                | 22      | 0.581            | 1.787   | 0.008  | 0.022    | 0.012   | 807  |
| Gao et al | hsa00590 | Arachidonic acid metabolism                  | 29      | 0.580            | 1.894   | 0.004  | 0.013    | 0.007   | 625  |
| Gao et al | hsa00260 | Glycine, serine and threonine metabolism     | 35      | 0.579            | 1.968   | 0.002  | 0.008    | 0.004   | 710  |
| Gao et al | hsa00620 | Pyruvate metabolism                          | 34      | 0.574            | 1.937   | 0.002  | 0.008    | 0.004   | 955  |
| Gao et al | hsa04130 | SNARE interactions in vesicular transport    | 25      | 0.569            | 1.802   | 0.009  | 0.027    | 0.015   | 2014 |
| Gao et al | hsa00760 | Nicotinate and nicotinamide metabolism       | 27      | 0.565            | 1.826   | 0.007  | 0.022    | 0.012   | 777  |
| Gao et al | hsa00983 | Drug metabolism - other enzymes              | 59      | 0.556            | 2.151   | 0.002  | 0.008    | 0.004   | 587  |
| Gao et al | hsa00561 | Glycerolipid metabolism                      | 30      | 0.544            | 1.791   | 0.008  | 0.022    | 0.012   | 1603 |
| Gao et al | hsa00330 | Arginine and proline metabolism              | 33      | 0.497            | 1.673   | 0.011  | 0.032    | 0.017   | 598  |
| Gao et al | hsa00010 | Glycolysis / Gluconeogenesis                 | 55      | 0.468            | 1.781   | 0.004  | 0.013    | 0.007   | 838  |
| Gao et al | hsa01200 | Carbon metabolism                            | 105     | 0.466            | 1.974   | 0.002  | 0.008    | 0.004   | 996  |
| Gao et al | hsa00190 | Oxidative phosphorylation                    | 83      | 0.460            | 1.871   | 0.002  | 0.008    | 0.004   | 2523 |
| Gao et al | hsa00270 | Cysteine and methionine metabolism           | 42      | 0.426            | 1.520   | 0.017  | 0.045    | 0.025   | 688  |
| Gao et al | hsa04217 | Necroptosis                                  | 74      | 0.405            | 1.624   | 0.008  | 0.022    | 0.012   | 1769 |
| Gao et al | hsa03010 | Ribosome                                     | 115     | (0.493)          | (2.178) | 0.002  | 0.008    | 0.004   | 2761 |
| Gao et al | hsa03018 | RNA degradation                              | 52      | (0.539)          | (2.081) | 0.002  | 0.008    | 0.004   | 2318 |
| Gao et al | hsa03015 | mRNA surveillance pathway                    | 63      | (0.581)          | (2.332) | 0.002  | 0.008    | 0.004   | 1843 |
| Gao et al | hsa03013 | RNA transport                                | 116     | (0.590)          | (2.618) | 0.002  | 0.008    | 0.004   | 1482 |
| Gao et al | hsa03008 | Ribosome biogenesis in eukaryotes            | 61      | (0.640)          | (2.553) | 0.002  | 0.008    | 0.004   | 1531 |
| Gao et al | hsa03022 | Basal transcription factors                  | 27      | (0.653)          | (2.157) | 0.002  | 0.008    | 0.004   | 1882 |
| Gao et al | hsa03020 | RNA polymerase                               | 20      | (0.653)          | (2.005) | 0.002  | 0.008    | 0.004   | 2225 |
| Gao et al | hsa03420 | Nucleotide excision repair                   | 33      | (0.679)          | (2.371) | 0.002  | 0.008    | 0.004   | 1484 |
| Gao et al | hsa04110 | Cell cycle                                   | 58      | (0.687)          | (2.719) | 0.002  | 0.008    | 0.004   | 888  |
| Gao et al | hsa03040 | Spliceosome                                  | 114     | (0.709)          | (3.144) | 0.002  | 0.008    | 0.004   | 1704 |
| Gao et al | hsa03410 | Base excision repair                         | 17      | (0.797)          | (2.331) | 0.002  | 0.008    | 0.004   | 328  |
| Gao et al | hsa03430 | Mismatch repair                              | 16      | (0.824)          | (2.349) | 0.002  | 0.008    | 0.004   | 666  |
| Gao et al | hsa03030 | DNA replication                              | 22      | (0.876)          | (2.726) | 0.002  | 0.008    | 0.004   | 705  |
| TCGA      | hsa00120 | Primary bile acid biosynthesis               | 17      | 0.915            | 2.052   | 0.002  | 0.008    | 0.004   | 991  |
| TCGA      | hsa00650 | Butanoate metabolism                         | 28      | 0.872            | 2.180   | 0.002  | 0.008    | 0.004   | 1141 |
| TCGA      | hsa00071 | Fatty acid degradation                       | 44      | 0.863            | 2.344   | 0.002  | 0.008    | 0.004   | 1206 |
| TCGA      | hsa00830 | Retinol metabolism                           | 65      | 0.860            | 2.500   | 0.002  | 0.008    | 0.004   | 1451 |
| TCGA      | hsa00260 | Glycine, serine and threonine metabolism     | 38      | 0.860            | 2.294   | 0.002  | 0.008    | 0.004   | 1442 |
| TCGA      | hsa00380 | Tryptophan metabolism                        | 40      | 0.856            | 2.291   | 0.002  | 0.008    | 0.004   | 1630 |
| TCGA      | hsa00072 | Synthesis and degradation of ketone bodies   | 10      | 0.856            | 1.706   | 0.006  | 0.016    | 0.008   | 1141 |
| TCGA      | hsa00350 | Tyrosine metabolism                          | 36      | 0.851            | 2.255   | 0.002  | 0.008    | 0.004   | 1451 |
| TCGA      | hsa00591 | Linoleic acid metabolism                     | 28      | 0.845            | 2.112   | 0.002  | 0.008    | 0.004   | 607  |
| TCGA      | hsa00982 | Drug metabolism - cytochrome P450            | 67      | 0.845            | 2.458   | 0.002  | 0.008    | 0.004   | 1061 |
| TCGA      | hsa00360 | Phenylalanine metabolism                     | 17      | 0.837            | 1.876   | 0.002  | 0.008    | 0.004   | 999  |
| TCGA      | hsa00220 | Arginine biosynthesis                        | 21      | 0.831            | 1.969   | 0.002  | 0.008    | 0.004   | 1704 |
| TCGA      | hsa00280 | Valine, leucine and isoleucine degradation   | 47      | 0.828            | 2.276   | 0.002  | 0.008    | 0.004   | 2134 |
| TCGA      | hsa00980 | Metabolism of xenobiotics by cytochrome P450 | 71      | 0.826            | 2.408   | 0.002  | 0.008    | 0.004   | 1123 |
| TCGA      | hsa00640 | Propanoate metabolism                        | 33      | 0.817            | 2.125   | 0.002  | 0.008    | 0.004   | 1368 |
| TCGA      | hsa00053 | Ascorbate and aldarate metabolism            | 27      | 0.816            | 2.028   | 0.002  | 0.008    | 0.004   | 1206 |

S12. The KEGG pathway analysis of High TME score vs Low TME score in HBV-related HCC cohorts

| Cohort       | ID       | Description                                                   | setSize | enrichment Score | NES     | pvalue | p.adjust | qvalues | rank |
|--------------|----------|---------------------------------------------------------------|---------|------------------|---------|--------|----------|---------|------|
| TCGA         | hsa03320 | PPAR signaling pathway                                        | 76      | 0.813            | 2.386   | 0.002  | 0.008    | 0.004   | 1505 |
| TCGA         | hsa00630 | Glyoxylate and dicarboxylate metabolism                       | 29      | 0.804            | 2.027   | 0.002  | 0.008    | 0.004   | 1557 |
| TCGA         | hsa00140 | Steroid hormone biosynthesis                                  | 59      | 0.802            | 2.302   | 0.002  | 0.008    | 0.004   | 1061 |
| TCGA         | hsa00410 | beta-Alanine metabolism                                       | 31      | 0.797            | 2.055   | 0.002  | 0.008    | 0.004   | 1428 |
| TCGA         | hsa00340 | Histidine metabolism                                          | 22      | 0.782            | 1.859   | 0.002  | 0.008    | 0.004   | 2384 |
| TCGA         | hsa00040 | Pentose and glucuronate interconversions                      | 33      | 0.759            | 1.974   | 0.002  | 0.008    | 0.004   | 1061 |
| TCGA         | hsa04146 | Peroxisome                                                    | 82      | 0.758            | 2.264   | 0.001  | 0.008    | 0.004   | 2120 |
| TCGA         | hsa00270 | Cysteine and methionine metabolism                            | 46      | 0.739            | 2.026   | 0.002  | 0.008    | 0.004   | 1250 |
| TCGA         | hsa00620 | Pyruvate metabolism                                           | 39      | 0.726            | 1.948   | 0.002  | 0.008    | 0.004   | 2134 |
| TCGA         | hsa00250 | Alanine, aspartate and glutamate metabolism                   | 34      | 0.722            | 1.886   | 0.003  | 0.012    | 0.006   | 846  |
| TCGA         | hsa00592 | alpha-Linolenic acid metabolism                               | 24      | 0.721            | 1.738   | 0.003  | 0.012    | 0.006   | 2241 |
| TCGA         | hsa00020 | Citrate cycle (TCA cycle)                                     | 30      | 0.714            | 1.818   | 0.003  | 0.012    | 0.006   | 1776 |
| TCGA         | hsa00790 | Folate biosynthesis                                           | 24      | 0.712            | 1.718   | 0.003  | 0.012    | 0.006   | 1613 |
| TCGA         | hsa00860 | Porphyrin and chlorophyll metabolism                          | 41      | 0.708            | 1.908   | 0.002  | 0.008    | 0.004   | 1061 |
| TCGA         | hsa01210 | 2-Oxocarboxylic acid metabolism                               | 18      | 0.705            | 1.600   | 0.018  | 0.043    | 0.023   | 2834 |
| TCGA         | hsa00590 | Arachidonic acid metabolism                                   | 61      | 0.691            | 1.995   | 0.002  | 0.008    | 0.004   | 1494 |
| TCGA         | hsa00983 | Drug metabolism - other enzymes                               | 77      | 0.685            | 2.017   | 0.002  | 0.008    | 0.004   | 1061 |
| TCGA         | hsa01212 | Fatty acid metabolism                                         | 52      | 0.662            | 1.862   | 0.002  | 0.008    | 0.004   | 1146 |
| TCGA         | hsa02010 | ABC transporters                                              | 45      | 0.650            | 1.778   | 0.002  | 0.008    | 0.004   | 3051 |
| TCGA         | hsa00330 | Arginine and proline metabolism                               | 48      | 0.650            | 1.798   | 0.002  | 0.008    | 0.004   | 1704 |
| TCGA         | hsa00561 | Glycerolipid metabolism                                       | 52      | 0.648            | 1.824   | 0.002  | 0.008    | 0.004   | 2134 |
| TCGA         | hsa01200 | Carbon metabolism                                             | 114     | 0.637            | 1.981   | 0.001  | 0.008    | 0.004   | 1630 |
| TCGA         | hsa00010 | Glycolysis / Gluconeogenesis                                  | 67      | 0.632            | 1.840   | 0.002  | 0.008    | 0.004   | 1674 |
| TCGA         | hsa01230 | Biosynthesis of amino acids                                   | 72      | 0.628            | 1.831   | 0.002  | 0.008    | 0.004   | 1080 |
| TCGA         | hsa00310 | Lysine degradation                                            | 56      | 0.610            | 1.732   | 0.003  | 0.012    | 0.006   | 1206 |
| TCGA         | hsa00760 | Nicotinate and nicotinamide metabolism                        | 37      | 0.607            | 1.619   | 0.008  | 0.022    | 0.012   | 2298 |
| TCGA         | hsa04061 | Viral protein interaction with cytokine and cytokine receptor | 98      | 0.584            | 1.778   | 0.001  | 0.008    | 0.004   | 2324 |
| TCGA         | hsa04514 | Cell adhesion molecules (CAMs)                                | 138     | 0.570            | 1.806   | 0.001  | 0.008    | 0.004   | 3103 |
| TCGA         | hsa04152 | AMPK signaling pathway                                        | 120     | 0.523            | 1.637   | 0.006  | 0.015    | 0.008   | 1698 |
| TCGA         | hsa00564 | Glycerophospholipid metabolism                                | 89      | 0.487            | 1.465   | 0.020  | 0.047    | 0.025   | 2241 |
| TCGA         | hsa04270 | Vascular smooth muscle contraction                            | 130     | 0.482            | 1.521   | 0.010  | 0.025    | 0.013   | 3332 |
| TCGA         | hsa04068 | FoxO signaling pathway                                        | 130     | 0.475            | 1.498   | 0.014  | 0.034    | 0.018   | 2580 |
| TCGA         | hsa04060 | Cytokine-cytokine receptor interaction                        | 289     | 0.457            | 1.561   | 0.001  | 0.008    | 0.004   | 3170 |
| TCGA         | hsa04062 | Chemokine signaling pathway                                   | 185     | 0.457            | 1.495   | 0.004  | 0.012    | 0.006   | 3682 |
| TCGA         | hsa04218 | Cellular senescence                                           | 157     | (0.363)          | (1.334) | 0.012  | 0.029    | 0.016   | 2288 |
| TCGA         | hsa04310 | Wnt signaling pathway                                         | 158     | (0.393)          | (1.446) | 0.004  | 0.012    | 0.006   | 3265 |
| TCGA         | hsa04114 | Oocyte meiosis                                                | 123     | (0.445)          | (1.578) | 0.004  | 0.012    | 0.006   | 1455 |
| TCGA         | hsa04390 | Hippo signaling pathway                                       | 154     | (0.457)          | (1.681) | 0.004  | 0.012    | 0.006   | 4220 |
| TCGA         | hsa04260 | Cardiac muscle contraction                                    | 82      | (0.469)          | (1.589) | 0.006  | 0.017    | 0.009   | 4515 |
| TCGA         | hsa03015 | mRNA surveillance pathway                                     | 90      | (0.559)          | (1.906) | 0.003  | 0.012    | 0.006   | 4589 |
| TCGA         | hsa03013 | RNA transport                                                 | 157     | (0.560)          | (2.060) | 0.004  | 0.012    | 0.006   | 4597 |
| TCGA         | hsa03460 | Fanconi anemia pathway                                        | 49      | (0.563)          | (1.708) | 0.008  | 0.022    | 0.012   | 1765 |
| TCGA         | hsa03410 | Base excision repair                                          | 33      | (0.565)          | (1.579) | 0.018  | 0.042    | 0.023   | 2681 |
| TCGA         | hsa03420 | Nucleotide excision repair                                    | 46      | (0.570)          | (1.705) | 0.005  | 0.015    | 0.008   | 2852 |
| TCGA         | hsa03008 | Ribosome biogenesis in eukaryotes                             | 72      | (0.572)          | (1.893) | 0.003  | 0.012    | 0.006   | 4337 |
| TCGA         | hsa03440 | Homologous recombination                                      | 37      | (0.599)          | (1.711) | 0.010  | 0.026    | 0.014   | 4843 |
| TCGA         | hsa03020 | RNA polymerase                                                | 31      | (0.622)          | (1.728) | 0.005  | 0.014    | 0.008   | 3962 |
| TCGA         | hsa03040 | Spliceosome                                                   | 131     | (0.643)          | (2.297) | 0.004  | 0.012    | 0.006   | 3618 |
| TCGA         | hsa04110 | Cell cycle                                                    | 124     | (0.662)          | (2.343) | 0.004  | 0.012    | 0.006   | 2260 |
| TCGA         | hsa03430 | Mismatch repair                                               | 23      | (0.682)          | (1.789) | 0.005  | 0.014    | 0.007   | 2678 |
| TCGA         | hsa03450 | Non-homologous end-joining                                    | 12      | (0.707)          | (1.537) | 0.019  | 0.044    | 0.024   | 1546 |
| TCGA         | hsa03030 | DNA replication                                               | 36      | (0.767)          | (2.169) | 0.003  | 0.011    | 0.006   | 2681 |
| TCGA         | hsa03010 | Ribosome                                                      | 134     | (0.769)          | (2.759) | 0.004  | 0.012    | 0.006   | 1929 |
| ICGC_LIRI_JP | hsa00072 | Synthesis and degradation of ketone bodies                    | 10      | 0.907            | 1.906   | 0.002  | 0.011    | 0.006   | 1170 |
| ICGC_LIRI_JP | hsa00650 | Butanoate metabolism                                          | 27      | 0.867            | 2.373   | 0.002  | 0.011    | 0.006   | 1381 |
| ICGC_LIRI_JP | hsa00280 | Valine, leucine and isoleucine degradation                    | 47      | 0.863            | 2.635   | 0.002  | 0.011    | 0.006   | 1421 |
| ICGC_LIRI_JP | hsa00071 | Fatty acid degradation                                        | 44      | 0.832            | 2.523   | 0.002  | 0.011    | 0.006   | 1421 |
| ICGC_LIRI_JP | hsa00640 | Propanoate metabolism                                         | 33      | 0.831            | 2.354   | 0.002  | 0.011    | 0.006   | 1363 |
| ICGC_LIRI_JP | hsa00120 | Primary bile acid biosynthesis                                | 17      | 0.803            | 1.948   | 0.002  | 0.011    | 0.006   | 1225 |
| ICGC_LIRI_JP | hsa00380 | Tryptophan metabolism                                         | 38      | 0.800            | 2.333   | 0.002  | 0.011    | 0.006   | 2269 |
| ICGC_LIRI_JP | hsa00260 | Glycine, serine and threonine metabolism                      | 39      | 0.794            | 2.330   | 0.002  | 0.011    | 0.006   | 2390 |
| ICGC_LIRI_JP | hsa00830 | Retinol metabolism                                            | 65      | 0.778            | 2.526   | 0.002  | 0.011    | 0.006   | 1304 |
| ICGC_LIRI_JP | hsa00630 | Glyoxylate and dicarboxylate metabolism                       | 29      | 0.738            | 2.028   | 0.002  | 0.011    | 0.006   | 2199 |
| ICGC_LIRI_JP | hsa00770 | Pantothenate and CoA biosynthesis                             | 19      | 0.736            | 1.842   | 0.004  | 0.018    | 0.010   | 856  |
| ICGC_LIRI_JP | hsa00500 | Starch and sucrose metabolism                                 | 35      | 0.731            | 2.106   | 0.002  | 0.011    | 0.006   | 1222 |
| ICGC_LIRI_JP | hsa00053 | Ascorbate and aldarate metabolism                             | 27      | 0.715            | 1.957   | 0.002  | 0.011    | 0.006   | 1421 |
| ICGC_LIRI_JP | hsa00140 | Steroid hormone biosynthesis                                  | 59      | 0.714            | 2.259   | 0.002  | 0.011    | 0.006   | 1079 |
| ICGC_LIRI_JP | hsa00220 | Arginine biosynthesis                                         | 21      | 0.707            | 1.819   | 0.004  | 0.018    | 0.010   | 1254 |
| ICGC_LIRI_JP | hsa00982 | Drug metabolism - cytochrome P450                             | 69      | 0.698            | 2.298   | 0.002  | 0.011    | 0.006   | 1268 |
| ICGC_LIRI_JP | hsa00020 | Citrate cycle (TCA cycle)                                     | 30      | 0.696            | 1.936   | 0.002  | 0.011    | 0.006   | 2197 |

S12. The KEGG pathway analysis of High TME score vs Low TME score in HBV-related HCC cohorts

| Cohort       | ID       | Description                                                   | setSize | enrichment Score | NES     | pvalue | p.adjust | qvalues | rank |
|--------------|----------|---------------------------------------------------------------|---------|------------------|---------|--------|----------|---------|------|
| ICGC_LIRI_JP | hsa01212 | Fatty acid metabolism                                         | 52      | 0.693            | 2.148   | 0.002  | 0.011    | 0.006   | 1293 |
| ICGC_LIRI_JP | hsa04146 | Peroxisome                                                    | 83      | 0.687            | 2.313   | 0.002  | 0.011    | 0.006   | 2279 |
| ICGC_LIRI_JP | hsa00410 | beta-Alanine metabolism                                       | 31      | 0.683            | 1.909   | 0.002  | 0.011    | 0.006   | 1421 |
| ICGC_LIRI_JP | hsa00620 | Pyruvate metabolism                                           | 38      | 0.666            | 1.942   | 0.002  | 0.011    | 0.006   | 3009 |
| ICGC_LIRI_JP | hsa00062 | Fatty acid elongation                                         | 23      | 0.657            | 1.713   | 0.006  | 0.025    | 0.014   | 988  |
| ICGC_LIRI_JP | hsa00350 | Tyrosine metabolism                                           | 36      | 0.648            | 1.864   | 0.002  | 0.011    | 0.006   | 2181 |
| ICGC_LIRI_JP | hsa00980 | Metabolism of xenobiotics by cytochrome P450                  | 73      | 0.635            | 2.101   | 0.002  | 0.011    | 0.006   | 1313 |
| ICGC_LIRI_JP | hsa01200 | Carbon metabolism                                             | 112     | 0.632            | 2.207   | 0.002  | 0.011    | 0.006   | 1946 |
| ICGC_LIRI_JP | hsa00340 | Histidine metabolism                                          | 21      | 0.625            | 1.608   | 0.014  | 0.048    | 0.029   | 2181 |
| ICGC_LIRI_JP | hsa00900 | Terpenoid backbone biosynthesis                               | 22      | 0.617            | 1.590   | 0.014  | 0.048    | 0.029   | 1896 |
| ICGC_LIRI_JP | hsa00250 | Alanine, aspartate and glutamate metabolism                   | 34      | 0.616            | 1.752   | 0.002  | 0.011    | 0.006   | 1254 |
| ICGC_LIRI_JP | hsa01040 | Biosynthesis of unsaturated fatty acids                       | 23      | 0.613            | 1.596   | 0.014  | 0.048    | 0.029   | 1225 |
| ICGC_LIRI_JP | hsa00270 | Cysteine and methionine metabolism                            | 46      | 0.600            | 1.819   | 0.002  | 0.011    | 0.006   | 3235 |
| ICGC_LIRI_JP | hsa00310 | Lysine degradation                                            | 47      | 0.595            | 1.818   | 0.002  | 0.011    | 0.006   | 1619 |
| ICGC_LIRI_JP | hsa00040 | Pentose and glucuronate interconversions                      | 32      | 0.577            | 1.622   | 0.012  | 0.046    | 0.027   | 1102 |
| ICGC_LIRI_JP | hsa03320 | PPAR signaling pathway                                        | 76      | 0.576            | 1.901   | 0.002  | 0.011    | 0.006   | 1405 |
| ICGC_LIRI_JP | hsa02010 | ABC transporters                                              | 45      | 0.519            | 1.572   | 0.012  | 0.046    | 0.027   | 2521 |
| ICGC_LIRI_JP | hsa00010 | Glycolysis / Gluconeogenesis                                  | 67      | 0.517            | 1.688   | 0.002  | 0.011    | 0.006   | 2076 |
| ICGC_LIRI_JP | hsa00590 | Arachidonic acid metabolism                                   | 61      | 0.497            | 1.592   | 0.010  | 0.039    | 0.023   | 736  |
| ICGC_LIRI_JP | hsa00983 | Drug metabolism - other enzymes                               | 79      | 0.493            | 1.642   | 0.004  | 0.018    | 0.010   | 1383 |
| ICGC_LIRI_JP | hsa04152 | AMPK signaling pathway                                        | 118     | 0.469            | 1.649   | 0.002  | 0.011    | 0.006   | 1861 |
| ICGC_LIRI_JP | hsa01230 | Biosynthesis of amino acids                                   | 71      | 0.449            | 1.476   | 0.014  | 0.048    | 0.029   | 2408 |
| ICGC_LIRI_JP | hsa04151 | PI3K-Akt signaling pathway                                    | 347     | (0.334)          | (1.343) | 0.004  | 0.018    | 0.011   | 4169 |
| ICGC_LIRI_JP | hsa04390 | Hippo signaling pathway                                       | 151     | (0.417)          | (1.527) | 0.004  | 0.018    | 0.010   | 3928 |
| ICGC_LIRI_JP | hsa04510 | Focal adhesion                                                | 193     | (0.439)          | (1.664) | 0.002  | 0.011    | 0.006   | 2021 |
| ICGC_LIRI_JP | hsa04110 | Cell cycle                                                    | 124     | (0.477)          | (1.712) | 0.004  | 0.018    | 0.010   | 2042 |
| ICGC_LIRI_JP | hsa04260 | Cardiac muscle contraction                                    | 82      | (0.493)          | (1.657) | 0.004  | 0.018    | 0.010   | 4124 |
| ICGC_LIRI_JP | hsa03010 | Ribosome                                                      | 133     | (0.495)          | (1.788) | 0.002  | 0.011    | 0.006   | 4203 |
| ICGC_LIRI_JP | hsa04512 | ECM-receptor interaction                                      | 86      | (0.594)          | (2.033) | 0.002  | 0.011    | 0.006   | 3370 |
| GSE10143     | hsa04061 | Viral protein interaction with cytokine and cytokine receptor | 65      | 0.645            | 2.322   | 0.002  | 0.046    | 0.041   | 514  |
| GSE10143     | hsa04514 | Cell adhesion molecules (CAMs)                                | 88      | 0.528            | 2.010   | 0.002  | 0.046    | 0.041   | 1054 |
| GSE10143     | hsa04060 | Cytokine-cytokine receptor interaction                        | 171     | 0.488            | 2.016   | 0.001  | 0.046    | 0.041   | 932  |
| GSE10143     | hsa04062 | Chemokine signaling pathway                                   | 129     | 0.470            | 1.884   | 0.002  | 0.046    | 0.041   | 1099 |
| GSE10143     | hsa04380 | Osteoclast differentiation                                    | 95      | 0.430            | 1.650   | 0.003  | 0.049    | 0.043   | 818  |
| GSE10143     | hsa04110 | Cell cycle                                                    | 87      | (0.452)          | (1.844) | 0.003  | 0.046    | 0.041   | 978  |
| GSE10143     | hsa04114 | Oocyte meiosis                                                | 67      | (0.459)          | (1.790) | 0.002  | 0.046    | 0.041   | 842  |
| GSE10143     | hsa03420 | Nucleotide excision repair                                    | 33      | (0.544)          | (1.842) | 0.002  | 0.046    | 0.041   | 1802 |
| GSE10143     | hsa03030 | DNA replication                                               | 26      | (0.584)          | (1.859) | 0.002  | 0.046    | 0.041   | 907  |

### S13. The KEGG pathway analysis of Hypoxia-TME subgroups in HBV-related HCC cohorts

| Hypoxia-TME score high risk vs others |          |                                              |         |                 |         |        |          |         |      |
|---------------------------------------|----------|----------------------------------------------|---------|-----------------|---------|--------|----------|---------|------|
| cohort                                | ID       | Description                                  | setSize | enrichmentScore | NES     | pvalue | p.adjust | qvalues | rank |
| GSE14520                              | hsa03030 | DNA replication                              | 34      | 0.742           | 2.153   | 0.022  | 0.071    | 0.045   | 2501 |
| GSE14520                              | hsa03430 | Mismatch repair                              | 22      | 0.675           | 1.799   | 0.020  | 0.071    | 0.045   | 2501 |
| GSE14520                              | hsa04110 | Cell cycle                                   | 114     | 0.670           | 2.433   | 0.023  | 0.071    | 0.045   | 1663 |
| GSE14520                              | hsa03040 | Spliceosome                                  | 102     | 0.655           | 2.338   | 0.021  | 0.071    | 0.045   | 2380 |
| GSE14520                              | hsa03010 | Ribosome                                     | 99      | 0.608           | 2.181   | 0.022  | 0.071    | 0.045   | 2745 |
| GSE14520                              | hsa03013 | RNA transport                                | 127     | 0.570           | 2.143   | 0.021  | 0.071    | 0.045   | 2271 |
| GSE14520                              | hsa03460 | Fanconi anemia pathway                       | 38      | 0.552           | 1.587   | 0.024  | 0.071    | 0.045   | 3218 |
| GSE14520                              | hsa03440 | Homologous recombination                     | 38      | 0.547           | 1.571   | 0.024  | 0.071    | 0.045   | 3296 |
| GSE14520                              | hsa03410 | Base excision repair                         | 30      | 0.496           | 1.380   | 0.021  | 0.071    | 0.045   | 1990 |
| GSE14520                              | hsa03015 | mRNA surveillance pathway                    | 68      | 0.496           | 1.603   | 0.025  | 0.073    | 0.046   | 2312 |
| GSE14520                              | hsa03008 | Ribosome biogenesis in eukaryotes            | 56      | 0.488           | 1.552   | 0.022  | 0.071    | 0.045   | 4077 |
| GSE14520                              | hsa04115 | p53 signaling pathway                        | 64      | 0.460           | 1.488   | 0.024  | 0.071    | 0.045   | 1336 |
| GSE14520                              | hsa03018 | RNA degradation                              | 57      | 0.450           | 1.445   | 0.022  | 0.071    | 0.045   | 1661 |
| GSE14520                              | hsa04114 | Oocyte meiosis                               | 96      | 0.437           | 1.522   | 0.023  | 0.071    | 0.045   | 1601 |
| GSE14520                              | hsa04390 | Hippo signaling pathway                      | 130     | 0.423           | 1.584   | 0.022  | 0.071    | 0.045   | 2929 |
| GSE14520                              | hsa04512 | ECM-receptor interaction                     | 79      | 0.418           | 1.409   | 0.023  | 0.071    | 0.045   | 1722 |
| GSE14520                              | hsa04350 | TGF-beta signaling pathway                   | 84      | 0.415           | 1.412   | 0.023  | 0.071    | 0.045   | 1992 |
| GSE14520                              | hsa04218 | Cellular senescence                          | 145     | 0.404           | 1.521   | 0.023  | 0.071    | 0.045   | 2524 |
| GSE14520                              | hsa00190 | Oxidative phosphorylation                    | 99      | (0.432)         | (1.484) | 0.036  | 0.097    | 0.062   | 2394 |
| GSE14520                              | hsa04152 | AMPK signaling pathway                       | 105     | (0.469)         | (1.590) | 0.036  | 0.097    | 0.062   | 1570 |
| GSE14520                              | hsa00564 | Glycerophospholipid metabolism               | 71      | (0.478)         | (1.549) | 0.032  | 0.091    | 0.058   | 990  |
| GSE14520                              | hsa01230 | Biosynthesis of amino acids                  | 63      | (0.524)         | (1.671) | 0.016  | 0.071    | 0.045   | 580  |
| GSE14520                              | hsa00561 | Glycerolipid metabolism                      | 46      | (0.538)         | (1.625) | 0.033  | 0.093    | 0.060   | 1813 |
| GSE14520                              | hsa01200 | Carbon metabolism                            | 105     | (0.567)         | (1.926) | 0.018  | 0.071    | 0.045   | 1040 |
| GSE14520                              | hsa00010 | Glycolysis / Gluconeogenesis                 | 60      | (0.568)         | (1.756) | 0.017  | 0.071    | 0.045   | 1160 |
| GSE14520                              | hsa00310 | Lysine degradation                           | 49      | (0.575)         | (1.770) | 0.016  | 0.071    | 0.045   | 663  |
| GSE14520                              | hsa00330 | Arginine and proline metabolism              | 38      | (0.582)         | (1.735) | 0.017  | 0.071    | 0.045   | 1260 |
| GSE14520                              | hsa02010 | ABC transporters                             | 37      | (0.597)         | (1.772) | 0.016  | 0.071    | 0.045   | 1603 |
| GSE14520                              | hsa00270 | Cysteine and methionine metabolism           | 43      | (0.607)         | (1.842) | 0.016  | 0.071    | 0.045   | 604  |
| GSE14520                              | hsa01212 | Fatty acid metabolism                        | 47      | (0.611)         | (1.855) | 0.016  | 0.071    | 0.045   | 1766 |
| GSE14520                              | hsa00250 | Alanine, aspartate and glutamate metabolism  | 28      | (0.624)         | (1.680) | 0.020  | 0.071    | 0.045   | 751  |
| GSE14520                              | hsa00790 | Folate biosynthesis                          | 22      | (0.642)         | (1.616) | 0.038  | 0.099    | 0.063   | 1494 |
| GSE14520                              | hsa00760 | Nicotinate and nicotinamide metabolism       | 25      | (0.642)         | (1.676) | 0.036  | 0.097    | 0.062   | 1601 |
| GSE14520                              | hsa00983 | Drug metabolism - other enzymes              | 54      | (0.642)         | (1.940) | 0.018  | 0.071    | 0.045   | 464  |
| GSE14520                              | hsa00620 | Pyruvate metabolism                          | 34      | (0.661)         | (1.876) | 0.018  | 0.071    | 0.045   | 1035 |
| GSE14520                              | hsa00590 | Arachidonic acid metabolism                  | 48      | (0.681)         | (2.084) | 0.016  | 0.071    | 0.045   | 990  |
| GSE14520                              | hsa03320 | PPAR signaling pathway                       | 66      | (0.685)         | (2.194) | 0.017  | 0.071    | 0.045   | 795  |
| GSE14520                              | hsa00020 | Citrate cycle (TCA cycle)                    | 29      | (0.690)         | (1.902) | 0.020  | 0.071    | 0.045   | 885  |
| GSE14520                              | hsa00860 | Porphyrin and chlorophyll metabolism         | 25      | (0.702)         | (1.834) | 0.018  | 0.071    | 0.045   | 425  |
| GSE14520                              | hsa00040 | Pentose and glucuronate interconversions     | 17      | (0.730)         | (1.716) | 0.019  | 0.071    | 0.045   | 444  |
| GSE14520                              | hsa04146 | Peroxisome                                   | 71      | (0.736)         | (2.383) | 0.016  | 0.071    | 0.045   | 1915 |
| GSE14520                              | hsa00640 | Propanoate metabolism                        | 30      | (0.755)         | (2.128) | 0.019  | 0.071    | 0.045   | 1069 |
| GSE14520                              | hsa00630 | Glyoxylate and dicarboxylate metabolism      | 24      | (0.789)         | (2.044) | 0.019  | 0.071    | 0.045   | 656  |
| GSE14520                              | hsa00260 | Glycine, serine and threonine metabolism     | 33      | (0.803)         | (2.315) | 0.018  | 0.071    | 0.045   | 656  |
| GSE14520                              | hsa00410 | beta-Alanine metabolism                      | 28      | (0.813)         | (2.186) | 0.020  | 0.071    | 0.045   | 1260 |
| GSE14520                              | hsa00220 | Arginine biosynthesis                        | 17      | (0.814)         | (1.915) | 0.019  | 0.071    | 0.045   | 580  |
| GSE14520                              | hsa00071 | Fatty acid degradation                       | 40      | (0.816)         | (2.396) | 0.017  | 0.071    | 0.045   | 797  |
| GSE14520                              | hsa00982 | Drug metabolism - cytochrome P450            | 49      | (0.819)         | (2.520) | 0.016  | 0.071    | 0.045   | 955  |
| GSE14520                              | hsa00980 | Metabolism of xenobiotics by cytochrome P450 | 51      | (0.824)         | (2.506) | 0.017  | 0.071    | 0.045   | 464  |
| GSE14520                              | hsa00140 | Steroid hormone biosynthesis                 | 43      | (0.824)         | (2.500) | 0.016  | 0.071    | 0.045   | 425  |
| GSE14520                              | hsa00360 | Phenylalanine metabolism                     | 15      | (0.827)         | (1.912) | 0.017  | 0.071    | 0.045   | 818  |
| GSE14520                              | hsa00350 | Tyrosine metabolism                          | 32      | (0.832)         | (2.429) | 0.018  | 0.071    | 0.045   | 1029 |
| GSE14520                              | hsa00053 | Ascorbate and aldarate metabolism            | 12      | (0.834)         | (1.852) | 0.018  | 0.071    | 0.045   | 1035 |
| GSE14520                              | hsa00591 | Linoleic acid metabolism                     | 20      | (0.834)         | (2.029) | 0.021  | 0.071    | 0.045   | 990  |
| GSE14520                              | hsa00280 | Valine, leucine and isoleucine degradation   | 42      | (0.844)         | (2.547) | 0.016  | 0.071    | 0.045   | 1064 |



### S13. The KEGG pathway analysis of Hypoxia-TME subgroups in HBV-related HCC cohorts

|                                             |           |                                              |                |                        |            |               |                 |                |             |
|---------------------------------------------|-----------|----------------------------------------------|----------------|------------------------|------------|---------------|-----------------|----------------|-------------|
| GSE14520                                    | hsa00340  | Histidine metabolism                         | 18             | (0.851)                | (2.035)    | 0.019         | 0.071           | 0.045          | 1260        |
| GSE14520                                    | hsa00650  | Butanoate metabolism                         | 23             | (0.852)                | (2.166)    | 0.019         | 0.071           | 0.045          | 797         |
| GSE14520                                    | hsa00380  | Tryptophan metabolism                        | 34             | (0.858)                | (2.436)    | 0.018         | 0.071           | 0.045          | 663         |
| GSE14520                                    | hsa00830  | Retinol metabolism                           | 39             | (0.881)                | (2.599)    | 0.017         | 0.071           | 0.045          | 782         |
| GSE14520                                    | hsa00120  | Primary bile acid biosynthesis               | 15             | (0.887)                | (2.050)    | 0.017         | 0.071           | 0.045          | 275         |
| <b>Hypoxia-TME score low risk vs others</b> |           |                                              |                |                        |            |               |                 |                |             |
|                                             | <b>ID</b> | <b>Description</b>                           | <b>setSize</b> | <b>enrichmentScore</b> | <b>NES</b> | <b>pvalue</b> | <b>p.adjust</b> | <b>qvalues</b> | <b>rank</b> |
| GSE14520                                    | hsa00120  | Primary bile acid biosynthesis               | 15             | 0.903                  | 2.192      | 0.022         | 0.083           | 0.058          | 572         |
| GSE14520                                    | hsa00380  | Tryptophan metabolism                        | 34             | 0.891                  | 2.509      | 0.020         | 0.083           | 0.058          | 809         |
| GSE14520                                    | hsa00830  | Retinol metabolism                           | 39             | 0.867                  | 2.457      | 0.020         | 0.083           | 0.058          | 952         |
| GSE14520                                    | hsa00071  | Fatty acid degradation                       | 40             | 0.864                  | 2.458      | 0.019         | 0.083           | 0.058          | 809         |
| GSE14520                                    | hsa00220  | Arginine biosynthesis                        | 17             | 0.846                  | 2.147      | 0.020         | 0.083           | 0.058          | 1282        |
| GSE14520                                    | hsa00591  | Linoleic acid metabolism                     | 20             | 0.839                  | 2.139      | 0.021         | 0.083           | 0.058          | 219         |
| GSE14520                                    | hsa00140  | Steroid hormone biosynthesis                 | 43             | 0.836                  | 2.439      | 0.018         | 0.083           | 0.058          | 474         |
| GSE14520                                    | hsa00260  | Glycine, serine and threonine metabolism     | 33             | 0.834                  | 2.331      | 0.020         | 0.083           | 0.058          | 528         |
| GSE14520                                    | hsa00280  | Valine, leucine and isoleucine degradation   | 42             | 0.833                  | 2.386      | 0.019         | 0.083           | 0.058          | 1277        |
| GSE14520                                    | hsa00053  | Ascorbate and aldarate metabolism            | 12             | 0.833                  | 1.882      | 0.026         | 0.088           | 0.061          | 789         |
| GSE14520                                    | hsa00982  | Drug metabolism - cytochrome P450            | 49             | 0.832                  | 2.467      | 0.020         | 0.083           | 0.058          | 1130        |
| GSE14520                                    | hsa00340  | Histidine metabolism                         | 18             | 0.828                  | 2.099      | 0.020         | 0.083           | 0.058          | 789         |
| GSE14520                                    | hsa00350  | Tyrosine metabolism                          | 32             | 0.828                  | 2.320      | 0.020         | 0.083           | 0.058          | 569         |
| GSE14520                                    | hsa00980  | Metabolism of xenobiotics by cytochrome P450 | 51             | 0.828                  | 2.415      | 0.020         | 0.083           | 0.058          | 1130        |
| GSE14520                                    | hsa00650  | Butanoate metabolism                         | 23             | 0.822                  | 2.165      | 0.020         | 0.083           | 0.058          | 929         |
| GSE14520                                    | hsa00630  | Glyoxylate and dicarboxylate metabolism      | 24             | 0.822                  | 2.144      | 0.021         | 0.083           | 0.058          | 535         |
| GSE14520                                    | hsa00410  | beta-Alanine metabolism                      | 28             | 0.816                  | 2.229      | 0.020         | 0.083           | 0.058          | 1232        |
| GSE14520                                    | hsa00640  | Propanoate metabolism                        | 30             | 0.794                  | 2.163      | 0.020         | 0.083           | 0.058          | 890         |
| GSE14520                                    | hsa00040  | Pentose and glucuronate interconversions     | 17             | 0.790                  | 2.006      | 0.020         | 0.083           | 0.058          | 584         |
| GSE14520                                    | hsa00360  | Phenylalanine metabolism                     | 15             | 0.790                  | 1.918      | 0.022         | 0.083           | 0.058          | 1232        |
| GSE14520                                    | hsa04146  | Peroxisome                                   | 71             | 0.767                  | 2.366      | 0.019         | 0.083           | 0.058          | 1512        |
| GSE14520                                    | hsa00590  | Arachidonic acid metabolism                  | 48             | 0.712                  | 2.159      | 0.019         | 0.083           | 0.058          | 456         |
| GSE14520                                    | hsa00790  | Folate biosynthesis                          | 22             | 0.702                  | 1.828      | 0.020         | 0.083           | 0.058          | 1405        |
| GSE14520                                    | hsa00020  | Citrate cycle (TCA cycle)                    | 29             | 0.699                  | 1.916      | 0.020         | 0.083           | 0.058          | 1339        |
| GSE14520                                    | hsa03320  | PPAR signaling pathway                       | 66             | 0.690                  | 2.098      | 0.019         | 0.083           | 0.058          | 799         |
| GSE14520                                    | hsa01212  | Fatty acid metabolism                        | 47             | 0.667                  | 2.002      | 0.019         | 0.083           | 0.058          | 809         |
| GSE14520                                    | hsa00620  | Pyruvate metabolism                          | 34             | 0.663                  | 1.867      | 0.020         | 0.083           | 0.058          | 789         |
| GSE14520                                    | hsa00983  | Drug metabolism - other enzymes              | 54             | 0.653                  | 1.973      | 0.019         | 0.083           | 0.058          | 1230        |
| GSE14520                                    | hsa00561  | Glycerolipid metabolism                      | 46             | 0.641                  | 1.931      | 0.018         | 0.083           | 0.058          | 1501        |
| GSE14520                                    | hsa00270  | Cysteine and methionine metabolism           | 43             | 0.635                  | 1.853      | 0.018         | 0.083           | 0.058          | 379         |
| GSE14520                                    | hsa00860  | Porphyrin and chlorophyll metabolism         | 25             | 0.633                  | 1.654      | 0.022         | 0.083           | 0.058          | 552         |
| GSE14520                                    | hsa02010  | ABC transporters                             | 37             | 0.629                  | 1.809      | 0.020         | 0.083           | 0.058          | 723         |
| GSE14520                                    | hsa00250  | Alanine, aspartate and glutamate metabolism  | 28             | 0.622                  | 1.697      | 0.020         | 0.083           | 0.058          | 1282        |
| GSE14520                                    | hsa00310  | Lysine degradation                           | 49             | 0.610                  | 1.808      | 0.020         | 0.083           | 0.058          | 1051        |
| GSE14520                                    | hsa00330  | Arginine and proline metabolism              | 38             | 0.596                  | 1.723      | 0.019         | 0.083           | 0.058          | 1080        |
| GSE14520                                    | hsa00010  | Glycolysis / Gluconeogenesis                 | 60             | 0.566                  | 1.700      | 0.020         | 0.083           | 0.058          | 974         |
| GSE14520                                    | hsa01200  | Carbon metabolism                            | 105            | 0.534                  | 1.730      | 0.018         | 0.083           | 0.058          | 1080        |
| GSE14520                                    | hsa04310  | Wnt signaling pathway                        | 131            | (0.416)                | (1.475)    | 0.023         | 0.083           | 0.058          | 2528        |
| GSE14520                                    | hsa04218  | Cellular senescence                          | 145            | (0.449)                | (1.635)    | 0.022         | 0.083           | 0.058          | 1479        |
| GSE14520                                    | hsa04390  | Hippo signaling pathway                      | 130            | (0.468)                | (1.652)    | 0.023         | 0.083           | 0.058          | 3150        |
| GSE14520                                    | hsa04120  | Ubiquitin mediated proteolysis               | 116            | (0.471)                | (1.628)    | 0.023         | 0.083           | 0.058          | 2673        |
| GSE14520                                    | hsa03013  | RNA transport                                | 127            | (0.568)                | (1.986)    | 0.025         | 0.085           | 0.059          | 2911        |
| GSE14520                                    | hsa03010  | Ribosome                                     | 99             | (0.569)                | (1.912)    | 0.024         | 0.083           | 0.058          | 3324        |
| GSE14520                                    | hsa03040  | Spliceosome                                  | 102            | (0.638)                | (2.209)    | 0.022         | 0.083           | 0.058          | 3349        |
| GSE14520                                    | hsa03430  | Mismatch repair                              | 22             | (0.682)                | (1.719)    | 0.020         | 0.083           | 0.058          | 1945        |
| GSE14520                                    | hsa04110  | Cell cycle                                   | 114            | (0.683)                | (2.323)    | 0.024         | 0.083           | 0.058          | 2065        |
| GSE14520                                    | hsa03030  | DNA replication                              | 34             | (0.747)                | (2.049)    | 0.019         | 0.083           | 0.058          | 1945        |

**Hypoxia-TME score high risk vs others**

### S13. The KEGG pathway analysis of Hypoxia-TME subgroups in HBV-related HCC cohorts

|           | ID       | Description                                  | setSize | enrichmentScore | NES     | pvalue | p.adjust | qvalues | rank |
|-----------|----------|----------------------------------------------|---------|-----------------|---------|--------|----------|---------|------|
| Gao et al | hsa03030 | DNA replication                              | 22      | 0.862           | 2.475   | 0.025  | 0.080    | 0.048   | 351  |
| Gao et al | hsa03430 | Mismatch repair                              | 16      | 0.784           | 2.087   | 0.026  | 0.080    | 0.048   | 758  |
| Gao et al | hsa04080 | Neuroactive ligand-receptor                  | 13      | 0.703           | 1.928   | 0.025  | 0.080    | 0.048   | 892  |
| Gao et al | hsa03410 | Base excision repair                         | 17      | 0.692           | 1.911   | 0.024  | 0.080    | 0.048   | 1205 |
| Gao et al | hsa03420 | Nucleotide excision repair                   | 33      | 0.629           | 2.114   | 0.027  | 0.080    | 0.048   | 1777 |
| Gao et al | hsa03022 | Basal transcription factors                  | 27      | 0.611           | 1.899   | 0.023  | 0.080    | 0.048   | 1997 |
| Gao et al | hsa04110 | Cell cycle                                   | 58      | 0.602           | 2.285   | 0.027  | 0.080    | 0.048   | 1426 |
| Gao et al | hsa03020 | RNA polymerase                               | 20      | 0.591           | 1.702   | 0.025  | 0.080    | 0.048   | 2292 |
| Gao et al | hsa03008 | Ribosome biogenesis in eukaryotes            | 61      | 0.566           | 2.194   | 0.027  | 0.080    | 0.048   | 2006 |
| Gao et al | hsa03040 | Spliceosome                                  | 114     | 0.548           | 2.297   | 0.026  | 0.080    | 0.048   | 2395 |
| Gao et al | hsa03013 | RNA transport                                | 116     | 0.521           | 2.180   | 0.026  | 0.080    | 0.048   | 2145 |
| Gao et al | hsa03015 | mRNA surveillance pathway                    | 63      | 0.460           | 1.729   | 0.029  | 0.080    | 0.048   | 2128 |
| Gao et al | hsa04066 | HIF-1 signaling pathway                      | 65      | 0.460           | 1.761   | 0.027  | 0.080    | 0.048   | 610  |
| Gao et al | hsa04145 | Phagosome                                    | 95      | 0.410           | 1.691   | 0.027  | 0.080    | 0.048   | 1804 |
| Gao et al | hsa03010 | Ribosome                                     | 115     | 0.381           | 1.593   | 0.026  | 0.080    | 0.048   | 2872 |
| Gao et al | hsa00190 | Oxidative phosphorylation                    | 83      | (0.365)         | (1.417) | 0.029  | 0.080    | 0.048   | 2163 |
| Gao et al | hsa01200 | Carbon metabolism                            | 105     | (0.434)         | (1.695) | 0.016  | 0.077    | 0.047   | 985  |
| Gao et al | hsa00250 | Alanine, aspartate and glutamate metabolism  | 28      | (0.489)         | (1.486) | 0.032  | 0.080    | 0.048   | 599  |
| Gao et al | hsa00760 | Nicotinate and nicotinamide metabolism       | 27      | (0.517)         | (1.531) | 0.034  | 0.084    | 0.051   | 1146 |
| Gao et al | hsa00330 | Arginine and proline metabolism              | 33      | (0.524)         | (1.655) | 0.031  | 0.080    | 0.048   | 852  |
| Gao et al | hsa00970 | Aminoacyl-tRNA biosynthesis                  | 24      | (0.544)         | (1.621) | 0.032  | 0.080    | 0.048   | 2034 |
| Gao et al | hsa03050 | Proteasome                                   | 41      | (0.545)         | (1.738) | 0.016  | 0.077    | 0.047   | 2184 |
| Gao et al | hsa00620 | Pyruvate metabolism                          | 34      | (0.575)         | (1.795) | 0.032  | 0.080    | 0.048   | 896  |
| Gao et al | hsa00590 | Arachidonic acid metabolism                  | 29      | (0.584)         | (1.786) | 0.031  | 0.080    | 0.048   | 597  |
| Gao et al | hsa00983 | Drug metabolism - other enzymes              | 59      | (0.591)         | (2.103) | 0.015  | 0.077    | 0.047   | 497  |
| Gao et al | hsa03320 | PPAR signaling pathway                       | 48      | (0.597)         | (2.022) | 0.015  | 0.077    | 0.047   | 796  |
| Gao et al | hsa01212 | Fatty acid metabolism                        | 40      | (0.609)         | (1.911) | 0.016  | 0.077    | 0.047   | 857  |
| Gao et al | hsa00561 | Glycerolipid metabolism                      | 30      | (0.611)         | (1.893) | 0.016  | 0.077    | 0.047   | 1022 |
| Gao et al | hsa00670 | One carbon pool by folate                    | 14      | (0.632)         | (1.596) | 0.030  | 0.080    | 0.048   | 959  |
| Gao et al | hsa00260 | Glycine, serine and threonine metabolism     | 35      | (0.633)         | (2.013) | 0.016  | 0.077    | 0.047   | 959  |
| Gao et al | hsa00062 | Fatty acid elongation                        | 16      | (0.635)         | (1.663) | 0.031  | 0.080    | 0.048   | 791  |
| Gao et al | hsa00310 | Lysine degradation                           | 34      | (0.647)         | (2.017) | 0.016  | 0.077    | 0.047   | 849  |
| Gao et al | hsa00020 | Citrate cycle (TCA cycle)                    | 28      | (0.661)         | (2.008) | 0.016  | 0.077    | 0.047   | 1365 |
| Gao et al | hsa00360 | Phenylalanine metabolism                     | 15      | (0.674)         | (1.706) | 0.016  | 0.077    | 0.047   | 664  |
| Gao et al | hsa00340 | Histidine metabolism                         | 18      | (0.682)         | (1.808) | 0.018  | 0.077    | 0.047   | 772  |
| Gao et al | hsa00280 | Valine, leucine and isoleucine degradation   | 45      | (0.683)         | (2.217) | 0.016  | 0.077    | 0.047   | 849  |
| Gao et al | hsa00450 | Selenocompound metabolism                    | 14      | (0.702)         | (1.772) | 0.015  | 0.077    | 0.047   | 966  |
| Gao et al | hsa00220 | Arginine biosynthesis                        | 17      | (0.707)         | (1.864) | 0.016  | 0.077    | 0.047   | 563  |
| Gao et al | hsa00640 | Propanoate metabolism                        | 30      | (0.716)         | (2.218) | 0.016  | 0.077    | 0.047   | 985  |
| Gao et al | hsa00920 | Sulfur metabolism                            | 10      | (0.718)         | (1.697) | 0.031  | 0.080    | 0.048   | 1123 |
| Gao et al | hsa02010 | ABC transporters                             | 25      | (0.723)         | (2.156) | 0.016  | 0.077    | 0.047   | 976  |
| Gao et al | hsa00630 | Glyoxylate and dicarboxylate metabolism      | 29      | (0.732)         | (2.239) | 0.016  | 0.077    | 0.047   | 1087 |
| Gao et al | hsa00860 | Porphyryn and chlorophyll metabolism         | 29      | (0.736)         | (2.250) | 0.016  | 0.077    | 0.047   | 827  |
| Gao et al | hsa04146 | Peroxisome                                   | 72      | (0.741)         | (2.790) | 0.015  | 0.077    | 0.047   | 981  |
| Gao et al | hsa00350 | Tyrosine metabolism                          | 25      | (0.751)         | (2.240) | 0.016  | 0.077    | 0.047   | 802  |
| Gao et al | hsa00650 | Butanoate metabolism                         | 22      | (0.754)         | (2.173) | 0.016  | 0.077    | 0.047   | 547  |
| Gao et al | hsa00071 | Fatty acid degradation                       | 38      | (0.772)         | (2.506) | 0.016  | 0.077    | 0.047   | 857  |
| Gao et al | hsa00380 | Tryptophan metabolism                        | 32      | (0.783)         | (2.488) | 0.015  | 0.077    | 0.047   | 849  |
| Gao et al | hsa00980 | Metabolism of xenobiotics by cytochrome P450 | 51      | (0.825)         | (2.802) | 0.016  | 0.077    | 0.047   | 710  |
| Gao et al | hsa00830 | Retinol metabolism                           | 39      | (0.828)         | (2.599) | 0.017  | 0.077    | 0.047   | 580  |
| Gao et al | hsa00982 | Drug metabolism - cytochrome P450            | 50      | (0.828)         | (2.806) | 0.015  | 0.077    | 0.047   | 494  |
| Gao et al | hsa00410 | beta-Alanine metabolism                      | 23      | (0.831)         | (2.440) | 0.016  | 0.077    | 0.047   | 796  |
| Gao et al | hsa00140 | Steroid hormone biosynthesis                 | 34      | (0.837)         | (2.610) | 0.016  | 0.077    | 0.047   | 517  |
| Gao et al | hsa00053 | Ascorbate and aldarate metabolism            | 17      | (0.838)         | (2.209) | 0.016  | 0.077    | 0.047   | 702  |
| Gao et al | hsa00040 | Pentose and glucuronate interconversions     | 21      | (0.840)         | (2.326) | 0.017  | 0.077    | 0.047   | 638  |
| Gao et al | hsa00591 | Linoleic acid metabolism                     | 10      | (0.847)         | (2.001) | 0.016  | 0.077    | 0.047   | 476  |
| Gao et al | hsa00120 | Primary bile acid biosynthesis               | 15      | (0.909)         | (2.303) | 0.016  | 0.077    | 0.047   | 517  |

### S13. The KEGG pathway analysis of Hypoxia-TME subgroups in HBV-related HCC cohorts

| Hypoxia-TME score low risk vs others |          |                                              |         |                 |         |        |          |         |      |
|--------------------------------------|----------|----------------------------------------------|---------|-----------------|---------|--------|----------|---------|------|
|                                      | ID       | Description                                  | setSize | enrichmentScore | NES     | pvalue | p.adjust | qvalues | rank |
| Gao et al                            | hsa00120 | Primary bile acid biosynthesis               | 15      | 0.886           | 2.458   | 0.018  | 0.068    | 0.041   | 693  |
| Gao et al                            | hsa00071 | Fatty acid degradation                       | 38      | 0.857           | 2.789   | 0.018  | 0.068    | 0.041   | 615  |
| Gao et al                            | hsa00830 | Retinol metabolism                           | 39      | 0.850           | 2.787   | 0.018  | 0.068    | 0.041   | 541  |
| Gao et al                            | hsa00053 | Ascorbate and aldarate metabolism            | 17      | 0.846           | 2.340   | 0.019  | 0.068    | 0.041   | 794  |
| Gao et al                            | hsa00410 | beta-Alanine metabolism                      | 23      | 0.841           | 2.503   | 0.020  | 0.068    | 0.041   | 615  |
| Gao et al                            | hsa00380 | Tryptophan metabolism                        | 32      | 0.815           | 2.622   | 0.018  | 0.068    | 0.041   | 814  |
| Gao et al                            | hsa00140 | Steroid hormone biosynthesis                 | 34      | 0.802           | 2.503   | 0.019  | 0.068    | 0.041   | 946  |
| Gao et al                            | hsa00982 | Drug metabolism - cytochrome P450            | 50      | 0.797           | 2.710   | 0.017  | 0.068    | 0.041   | 474  |
| Gao et al                            | hsa00591 | Linoleic acid metabolism                     | 10      | 0.790           | 1.901   | 0.018  | 0.068    | 0.041   | 607  |
| Gao et al                            | hsa00020 | Citrate cycle (TCA cycle)                    | 28      | 0.789           | 2.401   | 0.020  | 0.068    | 0.041   | 948  |
| Gao et al                            | hsa00040 | Pentose and glucuronate interconversions     | 21      | 0.788           | 2.265   | 0.021  | 0.068    | 0.041   | 350  |
| Gao et al                            | hsa04146 | Peroxisome                                   | 72      | 0.782           | 2.782   | 0.016  | 0.068    | 0.041   | 912  |
| Gao et al                            | hsa00650 | Butanoate metabolism                         | 22      | 0.763           | 2.243   | 0.020  | 0.068    | 0.041   | 463  |
| Gao et al                            | hsa00980 | Metabolism of xenobiotics by cytochrome P450 | 51      | 0.750           | 2.577   | 0.016  | 0.068    | 0.041   | 794  |
| Gao et al                            | hsa00630 | Glyoxylate and dicarboxylate metabolism      | 29      | 0.750           | 2.282   | 0.020  | 0.068    | 0.041   | 1243 |
| Gao et al                            | hsa00640 | Propanoate metabolism                        | 30      | 0.748           | 2.310   | 0.019  | 0.068    | 0.041   | 509  |
| Gao et al                            | hsa00220 | Arginine biosynthesis                        | 17      | 0.745           | 2.061   | 0.019  | 0.068    | 0.041   | 627  |
| Gao et al                            | hsa00280 | Valine, leucine and isoleucine degradation   | 45      | 0.741           | 2.467   | 0.016  | 0.068    | 0.041   | 519  |
| Gao et al                            | hsa01212 | Fatty acid metabolism                        | 40      | 0.737           | 2.417   | 0.018  | 0.068    | 0.041   | 502  |
| Gao et al                            | hsa02010 | ABC transporters                             | 25      | 0.729           | 2.156   | 0.020  | 0.068    | 0.041   | 961  |
| Gao et al                            | hsa00340 | Histidine metabolism                         | 18      | 0.726           | 1.971   | 0.020  | 0.068    | 0.041   | 1120 |
| Gao et al                            | hsa00062 | Fatty acid elongation                        | 16      | 0.719           | 2.008   | 0.018  | 0.068    | 0.041   | 493  |
| Gao et al                            | hsa00350 | Tyrosine metabolism                          | 25      | 0.717           | 2.119   | 0.020  | 0.068    | 0.041   | 663  |
| Gao et al                            | hsa00860 | Porphyrin and chlorophyll metabolism         | 29      | 0.715           | 2.178   | 0.020  | 0.068    | 0.041   | 813  |
| Gao et al                            | hsa00970 | Aminoacyl-tRNA biosynthesis                  | 24      | 0.688           | 2.051   | 0.020  | 0.068    | 0.041   | 1359 |
| Gao et al                            | hsa00790 | Folate biosynthesis                          | 16      | 0.687           | 1.919   | 0.018  | 0.068    | 0.041   | 1414 |
| Gao et al                            | hsa00360 | Phenylalanine metabolism                     | 15      | 0.683           | 1.893   | 0.018  | 0.068    | 0.041   | 172  |
| Gao et al                            | hsa00190 | Oxidative phosphorylation                    | 83      | 0.666           | 2.434   | 0.016  | 0.068    | 0.041   | 1431 |
| Gao et al                            | hsa00450 | Selenocompound metabolism                    | 14      | 0.659           | 1.796   | 0.034  | 0.084    | 0.050   | 1359 |
| Gao et al                            | hsa00260 | Glycine, serine and threonine metabolism     | 35      | 0.657           | 2.080   | 0.019  | 0.068    | 0.041   | 695  |
| Gao et al                            | hsa01040 | Biosynthesis of unsaturated fatty            | 15      | 0.650           | 1.802   | 0.018  | 0.068    | 0.041   | 263  |
| Gao et al                            | hsa03320 | PPAR signaling pathway                       | 48      | 0.641           | 2.203   | 0.016  | 0.068    | 0.041   | 502  |
| Gao et al                            | hsa00561 | Glycerolipid metabolism                      | 30      | 0.635           | 1.962   | 0.019  | 0.068    | 0.041   | 1108 |
| Gao et al                            | hsa01210 | 2-Oxocarboxylic acid metabolism              | 17      | 0.626           | 1.731   | 0.019  | 0.068    | 0.041   | 956  |
| Gao et al                            | hsa00620 | Pyruvate metabolism                          | 34      | 0.614           | 1.918   | 0.019  | 0.068    | 0.041   | 728  |
| Gao et al                            | hsa00310 | Lysine degradation                           | 34      | 0.613           | 1.915   | 0.019  | 0.068    | 0.041   | 615  |
| Gao et al                            | hsa00061 | Fatty acid biosynthesis                      | 14      | 0.600           | 1.635   | 0.034  | 0.084    | 0.050   | 502  |
| Gao et al                            | hsa04260 | Cardiac muscle contraction                   | 27      | 0.592           | 1.763   | 0.021  | 0.068    | 0.041   | 885  |
| Gao et al                            | hsa00590 | Arachidonic acid metabolism                  | 29      | 0.561           | 1.709   | 0.020  | 0.068    | 0.041   | 751  |
| Gao et al                            | hsa00250 | Alanine, aspartate and glutamate metabolism  | 28      | 0.522           | 1.590   | 0.040  | 0.096    | 0.057   | 569  |
| Gao et al                            | hsa00983 | Drug metabolism - other enzymes              | 59      | 0.518           | 1.826   | 0.015  | 0.068    | 0.041   | 672  |
| Gao et al                            | hsa01200 | Carbon metabolism                            | 105     | 0.501           | 1.914   | 0.015  | 0.068    | 0.041   | 841  |
| Gao et al                            | hsa00330 | Arginine and proline metabolism              | 33      | 0.475           | 1.505   | 0.038  | 0.092    | 0.055   | 844  |
| Gao et al                            | hsa00230 | Purine metabolism                            | 70      | (0.384)         | (1.478) | 0.024  | 0.073    | 0.044   | 626  |
| Gao et al                            | hsa04015 | Rap1 signaling pathway                       | 88      | (0.414)         | (1.620) | 0.026  | 0.074    | 0.044   | 688  |
| Gao et al                            | hsa04145 | Phagosome                                    | 95      | (0.424)         | (1.688) | 0.026  | 0.074    | 0.044   | 1364 |
| Gao et al                            | hsa04512 | ECM-receptor interaction                     | 46      | (0.440)         | (1.545) | 0.025  | 0.073    | 0.044   | 631  |
| Gao et al                            | hsa03015 | mRNA surveillance pathway                    | 63      | (0.459)         | (1.708) | 0.027  | 0.075    | 0.045   | 2434 |
| Gao et al                            | hsa03018 | RNA degradation                              | 52      | (0.469)         | (1.665) | 0.025  | 0.073    | 0.044   | 2390 |
| Gao et al                            | hsa04066 | HIF-1 signaling pathway                      | 65      | (0.489)         | (1.814) | 0.025  | 0.073    | 0.044   | 782  |
| Gao et al                            | hsa03013 | RNA transport                                | 116     | (0.537)         | (2.175) | 0.033  | 0.084    | 0.050   | 2068 |
| Gao et al                            | hsa03040 | Spliceosome                                  | 114     | (0.543)         | (2.217) | 0.032  | 0.084    | 0.050   | 2433 |
| Gao et al                            | hsa03022 | Basal transcription factors                  | 27      | (0.601)         | (1.903) | 0.019  | 0.068    | 0.041   | 2346 |
| Gao et al                            | hsa03420 | Nucleotide excision repair                   | 33      | (0.611)         | (2.021) | 0.020  | 0.068    | 0.041   | 1668 |
| Gao et al                            | hsa03008 | Ribosome biogenesis in eukaryotes            | 61      | (0.624)         | (2.272) | 0.028  | 0.075    | 0.045   | 1979 |
| Gao et al                            | hsa04110 | Cell cycle                                   | 58      | (0.627)         | (2.198) | 0.029  | 0.078    | 0.047   | 1141 |
| Gao et al                            | hsa03410 | Base excision repair                         | 17      | (0.729)         | (1.976) | 0.020  | 0.068    | 0.041   | 987  |

### S13. The KEGG pathway analysis of Hypoxia-TME subgroups in HBV-related HCC cohorts

| Gao et al                                    | hsa03430 | Mismatch repair                              | 16      | (0.733)         | (1.923) | 0.022  | 0.070    | 0.042   | 333  |
|----------------------------------------------|----------|----------------------------------------------|---------|-----------------|---------|--------|----------|---------|------|
| Gao et al                                    | hsa03030 | DNA replication                              | 22      | (0.843)         | (2.472) | 0.019  | 0.068    | 0.041   | 456  |
| <b>Hypoxia-TME score high risk vs others</b> |          |                                              |         |                 |         |        |          |         |      |
|                                              | ID       | Description                                  | setSize | enrichmentScore | NES     | pvalue | p.adjust | qvalues | rank |
| TCGA                                         | hsa03010 | Ribosome                                     | 134     | 0.794           | 2.741   | 0.032  | 0.095    | 0.061   | 1696 |
| TCGA                                         | hsa03030 | DNA replication                              | 36      | 0.724           | 2.018   | 0.023  | 0.093    | 0.060   | 3217 |
| TCGA                                         | hsa04110 | Cell cycle                                   | 124     | 0.664           | 2.253   | 0.033  | 0.095    | 0.061   | 2140 |
| TCGA                                         | hsa03040 | Spliceosome                                  | 131     | 0.649           | 2.219   | 0.034  | 0.095    | 0.061   | 3470 |
| TCGA                                         | hsa03440 | Homologous recombination                     | 37      | 0.555           | 1.565   | 0.022  | 0.093    | 0.060   | 2520 |
| TCGA                                         | hsa03008 | Ribosome biogenesis in eukaryotes            | 72      | 0.543           | 1.726   | 0.030  | 0.095    | 0.061   | 3704 |
| TCGA                                         | hsa03460 | Fanconi anemia pathway                       | 49      | 0.538           | 1.559   | 0.029  | 0.095    | 0.061   | 2943 |
| TCGA                                         | hsa03015 | mRNA surveillance pathway                    | 90      | 0.528           | 1.702   | 0.034  | 0.095    | 0.061   | 4521 |
| TCGA                                         | hsa03013 | RNA transport                                | 157     | 0.527           | 1.806   | 0.033  | 0.095    | 0.061   | 4333 |
| TCGA                                         | hsa04390 | Hippo signaling pathway                      | 154     | 0.494           | 1.703   | 0.031  | 0.095    | 0.061   | 3672 |
| TCGA                                         | hsa04260 | Cardiac muscle contraction                   | 82      | 0.484           | 1.512   | 0.034  | 0.095    | 0.061   | 1002 |
| TCGA                                         | hsa04512 | ECM-receptor interaction                     | 87      | 0.470           | 1.530   | 0.032  | 0.095    | 0.061   | 1392 |
| TCGA                                         | hsa04114 | Oocyte meiosis                               | 123     | 0.445           | 1.513   | 0.032  | 0.095    | 0.061   | 2055 |
| TCGA                                         | hsa03018 | RNA degradation                              | 75      | 0.436           | 1.397   | 0.029  | 0.095    | 0.061   | 4451 |
| TCGA                                         | hsa04218 | Cellular senescence                          | 157     | 0.436           | 1.493   | 0.033  | 0.095    | 0.061   | 2406 |
| TCGA                                         | hsa04310 | Wnt signaling pathway                        | 158     | 0.410           | 1.400   | 0.034  | 0.095    | 0.061   | 3656 |
| TCGA                                         | hsa04144 | Endocytosis                                  | 237     | 0.397           | 1.453   | 0.034  | 0.095    | 0.061   | 4250 |
| TCGA                                         | hsa04510 | Focal adhesion                               | 196     | 0.380           | 1.353   | 0.037  | 0.098    | 0.063   | 2484 |
| TCGA                                         | hsa04152 | AMPK signaling pathway                       | 120     | (0.519)         | (1.577) | 0.028  | 0.095    | 0.061   | 1623 |
| TCGA                                         | hsa01230 | Biosynthesis of amino acids                  | 72      | (0.600)         | (1.719) | 0.014  | 0.078    | 0.050   | 1290 |
| TCGA                                         | hsa00010 | Glycolysis / Gluconeogenesis                 | 67      | (0.620)         | (1.764) | 0.014  | 0.078    | 0.050   | 1633 |
| TCGA                                         | hsa00561 | Glycerolipid metabolism                      | 52      | (0.621)         | (1.638) | 0.029  | 0.095    | 0.061   | 2708 |
| TCGA                                         | hsa01200 | Carbon metabolism                            | 114     | (0.621)         | (1.917) | 0.013  | 0.078    | 0.050   | 1403 |
| TCGA                                         | hsa00310 | Lysine degradation                           | 56      | (0.630)         | (1.713) | 0.014  | 0.078    | 0.050   | 1911 |
| TCGA                                         | hsa01212 | Fatty acid metabolism                        | 52      | (0.636)         | (1.679) | 0.015  | 0.078    | 0.050   | 2359 |
| TCGA                                         | hsa00330 | Arginine and proline metabolism              | 48      | (0.642)         | (1.676) | 0.015  | 0.078    | 0.050   | 1512 |
| TCGA                                         | hsa00760 | Nicotinate and nicotinamide metabolism       | 37      | (0.646)         | (1.560) | 0.035  | 0.095    | 0.061   | 1877 |
| TCGA                                         | hsa00592 | alpha-Linolenic acid metabolism              | 24      | (0.659)         | (1.550) | 0.032  | 0.095    | 0.061   | 1558 |
| TCGA                                         | hsa00590 | Arachidonic acid metabolism                  | 61      | (0.665)         | (1.814) | 0.015  | 0.078    | 0.050   | 1030 |
| TCGA                                         | hsa02010 | ABC transporters                             | 45      | (0.677)         | (1.764) | 0.015  | 0.078    | 0.050   | 2367 |
| TCGA                                         | hsa00983 | Drug metabolism - other enzymes              | 77      | (0.690)         | (1.997) | 0.014  | 0.078    | 0.050   | 1266 |
| TCGA                                         | hsa01210 | 2-Oxocarboxylic acid metabolism              | 18      | (0.704)         | (1.553) | 0.033  | 0.095    | 0.061   | 953  |
| TCGA                                         | hsa00250 | Alanine, aspartate and glutamate metabolism  | 34      | (0.706)         | (1.729) | 0.018  | 0.079    | 0.051   | 1478 |
| TCGA                                         | hsa00860 | Porphyrin and chlorophyll metabolism         | 41      | (0.707)         | (1.784) | 0.016  | 0.078    | 0.050   | 1314 |
| TCGA                                         | hsa00270 | Cysteine and methionine metabolism           | 46      | (0.708)         | (1.829) | 0.015  | 0.078    | 0.050   | 1255 |
| TCGA                                         | hsa00020 | Citrate cycle (TCA cycle)                    | 30      | (0.710)         | (1.729) | 0.017  | 0.078    | 0.050   | 2992 |
| TCGA                                         | hsa00040 | Pentose and glucuronate interconversions     | 33      | (0.728)         | (1.790) | 0.017  | 0.078    | 0.050   | 1510 |
| TCGA                                         | hsa00620 | Pyruvate metabolism                          | 39      | (0.737)         | (1.827) | 0.017  | 0.078    | 0.050   | 1383 |
| TCGA                                         | hsa04146 | Peroxisome                                   | 82      | (0.764)         | (2.263) | 0.014  | 0.078    | 0.050   | 2388 |
| TCGA                                         | hsa03320 | PPAR signaling pathway                       | 76      | (0.770)         | (2.219) | 0.014  | 0.078    | 0.050   | 1428 |
| TCGA                                         | hsa00410 | beta-Alanine metabolism                      | 31      | (0.804)         | (1.966) | 0.017  | 0.078    | 0.050   | 1512 |
| TCGA                                         | hsa00630 | Glyoxylate and dicarboxylate metabolism      | 29      | (0.805)         | (1.969) | 0.016  | 0.078    | 0.050   | 1075 |
| TCGA                                         | hsa00640 | Propanoate metabolism                        | 33      | (0.812)         | (1.994) | 0.017  | 0.078    | 0.050   | 1058 |
| TCGA                                         | hsa00053 | Ascorbate and aldarate metabolism            | 27      | (0.816)         | (1.954) | 0.016  | 0.078    | 0.050   | 1358 |
| TCGA                                         | hsa00360 | Phenylalanine metabolism                     | 17      | (0.818)         | (1.807) | 0.016  | 0.078    | 0.050   | 953  |
| TCGA                                         | hsa00140 | Steroid hormone biosynthesis                 | 59      | (0.822)         | (2.231) | 0.015  | 0.078    | 0.050   | 1001 |
| TCGA                                         | hsa00220 | Arginine biosynthesis                        | 21      | (0.830)         | (1.886) | 0.015  | 0.078    | 0.050   | 953  |
| TCGA                                         | hsa00280 | Valine, leucine and isoleucine degradation   | 47      | (0.836)         | (2.186) | 0.015  | 0.078    | 0.050   | 1421 |
| TCGA                                         | hsa00591 | Linoleic acid metabolism                     | 28      | (0.836)         | (2.029) | 0.016  | 0.078    | 0.050   | 1558 |
| TCGA                                         | hsa00980 | Metabolism of xenobiotics by cytochrome P450 | 71      | (0.837)         | (2.385) | 0.014  | 0.078    | 0.050   | 1001 |
| TCGA                                         | hsa00350 | Tyrosine metabolism                          | 36      | (0.841)         | (2.050) | 0.017  | 0.078    | 0.050   | 1083 |
| TCGA                                         | hsa00982 | Drug metabolism - cytochrome P450            | 67      | (0.844)         | (2.401) | 0.014  | 0.078    | 0.050   | 1001 |
| TCGA                                         | hsa00260 | Glycine, serine and threonine metabolism     | 38      | (0.846)         | (2.067) | 0.017  | 0.078    | 0.050   | 1626 |

### S13. The KEGG pathway analysis of Hypoxia-TME subgroups in HBV-related HCC cohorts

|      |           |                                                 |                |                        |            |               |                 |                |             |
|------|-----------|-------------------------------------------------|----------------|------------------------|------------|---------------|-----------------|----------------|-------------|
| TCGA | hsa00340  | Histidine metabolism                            | 22             | (0.848)                | (1.982)    | 0.015         | 0.078           | 0.050          | 1717        |
| TCGA | hsa00071  | Fatty acid degradation                          | 44             | (0.851)                | (2.209)    | 0.015         | 0.078           | 0.050          | 1871        |
| TCGA | hsa00380  | Tryptophan metabolism                           | 40             | (0.857)                | (2.140)    | 0.016         | 0.078           | 0.050          | 1358        |
| TCGA | hsa00072  | Synthesis and degradation of ketone bodies      | 10             | (0.869)                | (1.612)    | 0.019         | 0.083           | 0.053          | 1785        |
| TCGA | hsa00830  | Retinol metabolism                              | 65             | (0.874)                | (2.453)    | 0.015         | 0.078           | 0.050          | 1001        |
| TCGA | hsa00650  | Butanoate metabolism                            | 28             | (0.879)                | (2.135)    | 0.016         | 0.078           | 0.050          | 1352        |
| TCGA | hsa00120  | Primary bile acid biosynthesis                  | 17             | (0.924)                | (2.041)    | 0.016         | 0.078           | 0.050          | 918         |
|      |           |                                                 |                |                        |            |               |                 |                |             |
|      |           | <b>Hypoxia-TME score low risk vs others</b>     |                |                        |            |               |                 |                |             |
|      | <b>ID</b> | <b>Description</b>                              | <b>setSize</b> | <b>enrichmentScore</b> | <b>NES</b> | <b>pvalue</b> | <b>p.adjust</b> | <b>qvalues</b> | <b>rank</b> |
| TCGA | hsa00120  | Primary bile acid biosynthesis                  | 17             | 0.920                  | 2.084      | 0.018         | 0.071           | 0.044          | 880         |
| TCGA | hsa00830  | Retinol metabolism                              | 65             | 0.887                  | 2.497      | 0.018         | 0.071           | 0.044          | 748         |
| TCGA | hsa00650  | Butanoate metabolism                            | 28             | 0.877                  | 2.123      | 0.019         | 0.071           | 0.044          | 1147        |
| TCGA | hsa00071  | Fatty acid degradation                          | 44             | 0.874                  | 2.376      | 0.017         | 0.071           | 0.044          | 1365        |
| TCGA | hsa00072  | Synthesis and degradation of ketone bodies      | 10             | 0.868                  | 1.742      | 0.018         | 0.071           | 0.044          | 1147        |
| TCGA | hsa00380  | Tryptophan metabolism                           | 40             | 0.868                  | 2.262      | 0.018         | 0.071           | 0.044          | 1156        |
| TCGA | hsa00982  | Drug metabolism - cytochrome P450               | 67             | 0.867                  | 2.464      | 0.018         | 0.071           | 0.044          | 997         |
| TCGA | hsa00053  | Ascorbate and aldarate metabolism               | 27             | 0.865                  | 2.129      | 0.018         | 0.071           | 0.044          | 906         |
| TCGA | hsa00591  | Linoleic acid metabolism                        | 28             | 0.865                  | 2.093      | 0.019         | 0.071           | 0.044          | 858         |
| TCGA | hsa00350  | Tyrosine metabolism                             | 36             | 0.854                  | 2.187      | 0.018         | 0.071           | 0.044          | 1218        |
| TCGA | hsa00980  | Metabolism of xenobiotics by cytochrome P450    | 71             | 0.853                  | 2.454      | 0.017         | 0.071           | 0.044          | 997         |
| TCGA | hsa00140  | Steroid hormone biosynthesis                    | 59             | 0.850                  | 2.365      | 0.016         | 0.071           | 0.044          | 880         |
| TCGA | hsa00260  | Glycine, serine and threonine metabolism        | 38             | 0.843                  | 2.184      | 0.018         | 0.071           | 0.044          | 1735        |
| TCGA | hsa00340  | Histidine metabolism                            | 22             | 0.841                  | 1.948      | 0.019         | 0.071           | 0.044          | 1189        |
| TCGA | hsa00220  | Arginine biosynthesis                           | 21             | 0.835                  | 1.922      | 0.019         | 0.071           | 0.044          | 1814        |
| TCGA | hsa00630  | Glyoxylate and dicarboxylate metabolism         | 29             | 0.826                  | 2.024      | 0.019         | 0.071           | 0.044          | 1131        |
| TCGA | hsa00280  | Valine, leucine and isoleucine degradation      | 47             | 0.816                  | 2.194      | 0.017         | 0.071           | 0.044          | 1588        |
| TCGA | hsa00410  | beta-Alanine metabolism                         | 31             | 0.813                  | 2.033      | 0.018         | 0.071           | 0.044          | 1535        |
| TCGA | hsa00640  | Propanoate metabolism                           | 33             | 0.810                  | 2.031      | 0.018         | 0.071           | 0.044          | 1397        |
| TCGA | hsa00360  | Phenylalanine metabolism                        | 17             | 0.809                  | 1.834      | 0.018         | 0.071           | 0.044          | 1218        |
| TCGA | hsa00040  | Pentose and glucuronate interconversions        | 33             | 0.804                  | 2.018      | 0.018         | 0.071           | 0.044          | 749         |
| TCGA | hsa03320  | PPAR signaling pathway                          | 76             | 0.799                  | 2.334      | 0.017         | 0.071           | 0.044          | 1147        |
| TCGA | hsa04146  | Peroxisome                                      | 82             | 0.759                  | 2.262      | 0.017         | 0.071           | 0.044          | 1829        |
| TCGA | hsa00790  | Folate biosynthesis                             | 24             | 0.758                  | 1.785      | 0.019         | 0.071           | 0.044          | 2018        |
| TCGA | hsa00620  | Pyruvate metabolism                             | 39             | 0.738                  | 1.911      | 0.018         | 0.071           | 0.044          | 1413        |
| TCGA | hsa00860  | Porphyry and chlorophyll metabolism             | 41             | 0.720                  | 1.888      | 0.018         | 0.071           | 0.044          | 2180        |
| TCGA | hsa00250  | Alanine, aspartate and glutamate metabolism     | 34             | 0.712                  | 1.802      | 0.018         | 0.071           | 0.044          | 1715        |
| TCGA | hsa00020  | Citrate cycle (TCA cycle)                       | 30             | 0.710                  | 1.752      | 0.019         | 0.071           | 0.044          | 1156        |
| TCGA | hsa00590  | Arachidonic acid metabolism                     | 61             | 0.707                  | 1.985      | 0.017         | 0.071           | 0.044          | 858         |
| TCGA | hsa00983  | Drug metabolism - other enzymes                 | 77             | 0.703                  | 2.068      | 0.017         | 0.071           | 0.044          | 910         |
| TCGA | hsa00592  | alpha-Linolenic acid metabolism                 | 24             | 0.701                  | 1.651      | 0.019         | 0.071           | 0.044          | 2512        |
| TCGA | hsa01210  | 2-Oxocarboxylic acid metabolism                 | 18             | 0.694                  | 1.577      | 0.037         | 0.092           | 0.057          | 797         |
| TCGA | hsa00270  | Cysteine and methionine metabolism              | 46             | 0.689                  | 1.843      | 0.017         | 0.071           | 0.044          | 1684        |
| TCGA | hsa00310  | Lysine degradation                              | 56             | 0.668                  | 1.835      | 0.016         | 0.071           | 0.044          | 1156        |
| TCGA | hsa01212  | Fatty acid metabolism                           | 52             | 0.665                  | 1.794      | 0.017         | 0.071           | 0.044          | 1395        |
| TCGA | hsa00561  | Glycerolipid metabolism                         | 52             | 0.659                  | 1.776      | 0.017         | 0.071           | 0.044          | 2351        |
| TCGA | hsa02010  | ABC transporters                                | 45             | 0.647                  | 1.729      | 0.017         | 0.071           | 0.044          | 2896        |
| TCGA | hsa00010  | Glycolysis / Gluconeogenesis                    | 67             | 0.636                  | 1.807      | 0.018         | 0.071           | 0.044          | 1056        |
| TCGA | hsa00330  | Arginine and proline metabolism                 | 48             | 0.627                  | 1.667      | 0.018         | 0.071           | 0.044          | 2288        |
| TCGA | hsa01200  | Carbon metabolism                               | 114            | 0.624                  | 1.932      | 0.016         | 0.071           | 0.044          | 1156        |
| TCGA | hsa00760  | Nicotinate and nicotinamide metabolism          | 37             | 0.616                  | 1.566      | 0.037         | 0.092           | 0.057          | 2400        |
| TCGA | hsa01230  | Biosynthesis of amino acids                     | 72             | 0.597                  | 1.709      | 0.017         | 0.071           | 0.044          | 797         |
| TCGA | hsa04152  | AMPK signaling pathway                          | 120            | 0.516                  | 1.603      | 0.016         | 0.071           | 0.044          | 1655        |
| TCGA | hsa04213  | Longevity regulating pathway - multiple species | 62             | 0.513                  | 1.456      | 0.033         | 0.085           | 0.053          | 3131        |
| TCGA | hsa04270  | Vascular smooth muscle contraction              | 130            | 0.499                  | 1.582      | 0.015         | 0.071           | 0.044          | 2996        |

### S13. The KEGG pathway analysis of Hypoxia-TME subgroups in HBV-related HCC cohorts

|      |          |                                   |     |         |         |       |       |       |      |
|------|----------|-----------------------------------|-----|---------|---------|-------|-------|-------|------|
| TCGA | hsa04068 | FoxO signaling pathway            | 130 | 0.471   | 1.492   | 0.015 | 0.071 | 0.044 | 2566 |
| TCGA | hsa00564 | Glycerophospholipid metabolism    | 89  | 0.456   | 1.368   | 0.033 | 0.085 | 0.053 | 2512 |
| TCGA | hsa04510 | Focal adhesion                    | 196 | (0.350) | (1.296) | 0.029 | 0.079 | 0.049 | 2247 |
| TCGA | hsa04144 | Endocytosis                       | 237 | (0.353) | (1.351) | 0.032 | 0.085 | 0.053 | 3859 |
| TCGA | hsa04218 | Cellular senescence               | 157 | (0.404) | (1.433) | 0.027 | 0.077 | 0.048 | 2689 |
| TCGA | hsa04114 | Oocyte meiosis                    | 123 | (0.424) | (1.394) | 0.028 | 0.077 | 0.048 | 2049 |
| TCGA | hsa03018 | RNA degradation                   | 75  | (0.434) | (1.358) | 0.023 | 0.073 | 0.045 | 3916 |
| TCGA | hsa04260 | Cardiac muscle contraction        | 82  | (0.438) | (1.381) | 0.023 | 0.073 | 0.045 | 2557 |
| TCGA | hsa04390 | Hippo signaling pathway           | 154 | (0.466) | (1.647) | 0.028 | 0.077 | 0.048 | 4098 |
| TCGA | hsa04512 | ECM-receptor interaction          | 87  | (0.470) | (1.516) | 0.023 | 0.073 | 0.045 | 2155 |
| TCGA | hsa03460 | Fanconi anemia pathway            | 49  | (0.521) | (1.496) | 0.022 | 0.073 | 0.045 | 2123 |
| TCGA | hsa03013 | RNA transport                     | 157 | (0.540) | (1.918) | 0.027 | 0.077 | 0.048 | 4908 |
| TCGA | hsa03015 | mRNA surveillance pathway         | 90  | (0.541) | (1.739) | 0.023 | 0.073 | 0.045 | 4786 |
| TCGA | hsa03008 | Ribosome biogenesis in eukaryotes | 72  | (0.574) | (1.757) | 0.023 | 0.073 | 0.045 | 3002 |
| TCGA | hsa03440 | Homologous recombination          | 37  | (0.599) | (1.634) | 0.021 | 0.073 | 0.045 | 5407 |
| TCGA | hsa04110 | Cell cycle                        | 124 | (0.638) | (2.120) | 0.028 | 0.077 | 0.048 | 1999 |
| TCGA | hsa03040 | Spliceosome                       | 131 | (0.652) | (2.214) | 0.029 | 0.079 | 0.049 | 3144 |
| TCGA | hsa03030 | DNA replication                   | 36  | (0.710) | (1.908) | 0.021 | 0.073 | 0.045 | 3857 |
| TCGA | hsa03010 | Ribosome                          | 134 | (0.761) | (2.614) | 0.028 | 0.077 | 0.048 | 1639 |

**S14. Other HCC-related molecular classification gene sets signature (n=87) in the MSigDB used in current study**

| <b>Signatures</b>           | <b>Msigdb Names</b>                      | <b>Description</b>                                                                                                                                                                                         |
|-----------------------------|------------------------------------------|------------------------------------------------------------------------------------------------------------------------------------------------------------------------------------------------------------|
| Andersen_good_survival      | ANDERSEN_CHOLANGIOCARCINOMA_CLASS1       | Genes overexpressed in cholangiocarcinoma class 1 associated with good prognosis                                                                                                                           |
| Andersen_poor_survival      | ANDERSEN_CHOLANGIOCARCINOMA_CLASS2       | Genes overexpressed in cholangiocarcinoma class 2 associated with poor prognosis.                                                                                                                          |
| Boyault_G123_dn             | BOYAULT_LIVER_CANCER_SUBCLASS_G123_DN    | Down-regulated genes in hepatocellular carcinoma (HCC) subclass G123, defined by unsupervised clustering.                                                                                                  |
| Boyault_G123_up             | BOYAULT_LIVER_CANCER_SUBCLASS_G123_UP    | Up-regulated genes in hepatocellular carcinoma (HCC) subclass G123, defined by unsupervised clustering.                                                                                                    |
| Boyault_G12_dn              | BOYAULT_LIVER_CANCER_SUBCLASS_G12_DN     | Down-regulated genes in hepatocellular carcinoma (HCC) subclass G12, defined by unsupervised clustering                                                                                                    |
| Boyault_G12_up              | BOYAULT_LIVER_CANCER_SUBCLASS_G12_UP     | Up-regulated genes in hepatocellular carcinoma (HCC) subclass G12, defined by unsupervised clustering                                                                                                      |
| Boyault_G1_dn               | BOYAULT_LIVER_CANCER_SUBCLASS_G1_DN      | Down-regulated genes in hepatocellular carcinoma (HCC) subclass G1, defined by unsupervised clustering                                                                                                     |
| Boyault_G1_up               | BOYAULT_LIVER_CANCER_SUBCLASS_G1_UP      | Up-regulated genes in hepatocellular carcinoma (HCC) subclass G1, defined by unsupervised clustering                                                                                                       |
| Boyault_G2                  | BOYAULT_LIVER_CANCER_SUBCLASS_G2         | Genes in hepatocellular carcinoma (HCC) subclass G2, defined by unsupervised clustering.                                                                                                                   |
| Boyault_G23_dn              | BOYAULT_LIVER_CANCER_SUBCLASS_G23_DN     | Down-regulated genes in hepatocellular carcinoma (HCC) subclass G23, defined by unsupervised clustering.                                                                                                   |
| Boyault_G23_up              | BOYAULT_LIVER_CANCER_SUBCLASS_G23_UP     | Up-regulated genes in hepatocellular carcinoma (HCC) subclass G23, defined by unsupervised clustering.                                                                                                     |
| Boyault_G3_dn               | BOYAULT_LIVER_CANCER_SUBCLASS_G3_DN      | Down-regulated genes in hepatocellular carcinoma (HCC) subclass G3, defined by unsupervised clustering.                                                                                                    |
| Boyault_G3_up               | BOYAULT_LIVER_CANCER_SUBCLASS_G3_UP      | Up-regulated genes in hepatocellular carcinoma (HCC) subclass G3, defined by unsupervised clustering.                                                                                                      |
| Boyault_G56_dn              | BOYAULT_LIVER_CANCER_SUBCLASS_G56_DN     | Down-regulated genes in hepatocellular carcinoma (HCC) subclass G56, defined by unsupervised clustering.                                                                                                   |
| Boyault_G56_up              | BOYAULT_LIVER_CANCER_SUBCLASS_G56_UP     | Up-regulated genes in hepatocellular carcinoma (HCC) subclass G56, defined by unsupervised clustering.                                                                                                     |
| Boyault_G5_dn               | BOYAULT_LIVER_CANCER_SUBCLASS_G5_DN      | Down-regulated genes in hepatocellular carcinoma (HCC) subclass G5, defined by unsupervised clustering.                                                                                                    |
| Boyault_G6_dn               | BOYAULT_LIVER_CANCER_SUBCLASS_G6_DN      | Down-regulated genes in hepatocellular carcinoma (HCC) subclass G6, defined by unsupervised clustering.                                                                                                    |
| Boyault_G6_up               | BOYAULT_LIVER_CANCER_SUBCLASS_G6_UP      | Up-regulated genes in hepatocellular carcinoma (HCC) subclass G6, defined by unsupervised clustering.                                                                                                      |
| Cavard_malignant            | CAVARD_LIVER_CANCER_MALIGNANT_VS_BENIGN  | Genes identified by subtractive hybridization comparing malignant and benign components of a hepatocellular carcinoma (HCC) in a pre-existing liver adenoma in a morphologically normal liver.             |
| Couluarn_TGFB1_dn           | COULOUARN_TEMPORAL_TGFB1_SIGNATURE_DN    | 'Early-TGFB1 signature': genes overexpressed in primary hepatocytes at an early phase of TGFB1 [GeneID=7040] treatment; is associated with a less invasive phenotype.                                      |
| Couluarn_TGFB1_up           | COULOUARN_TEMPORAL_TGFB1_SIGNATURE_UP    | 'Late-TGFB1 signature': genes overexpressed in primary hepatocytes at a late phase of TGFB1 [GeneID=7040] treatment; is associated with a more invasive phenotype.                                         |
| Gho_ATF5_dn                 | GHO_ATF5_TARGETS_DN                      | Genes down-regulated in HEP3B cells (liver cancer) overexpressing ATF5 [GeneID=22809] off a plasmid vector.                                                                                                |
| Gho_ATF5_up                 | GHO_ATF5_TARGETS_UP                      | Genes up-regulated in HEP3B cells (liver cancer) overexpressing ATF5 [GeneID=22809] off a plasmid vector.                                                                                                  |
| HO_vascular_invasion        | HO_LIVER_CANCER_VASCULAR_INVASION        | Gene expression signature of vascular invasion of hepatocellular carcinoma (HCC).                                                                                                                          |
| Hoshida_S1                  | HOSHIDA_LIVER_CANCER_SUBCLASS_S1         | Genes from 'subtype S1' signature of hepatocellular carcinoma (HCC): aberrant activation of the WNT signaling pathway.                                                                                     |
| Hoshida_S2                  | HOSHIDA_LIVER_CANCER_SUBCLASS_S2         | Genes from 'subtype S2' signature of hepatocellular carcinoma (HCC): proliferation, MYC and AKT1 [GeneID=4609;207] activation.                                                                             |
| Hoshida_S3                  | HOSHIDA_LIVER_CANCER_SUBCLASS_S3         | Genes from 'subtype S3' signature of hepatocellular carcinoma (HCC): hepatocyte differentiation.                                                                                                           |
| Iizuka_progression_G1_G2_dn | IIZUKA_LIVER_CANCER_PROGRESSION_G1_G2_DN | Genes down-regulated during transition from G1 (well differentiated tumor, infected with HCV) to G2 (moderately differentiated tumor, infected with HCV) in the development of hepatocellular carcinoma.   |
| Iizuka_progression_G1_G2_up | IIZUKA_LIVER_CANCER_PROGRESSION_G1_G2_UP | Genes up-regulated during transition from G1 (well differentiated tumor, infected with HCV) to G2 (moderately differentiated tumor, infected with HCV) in the development of hepatocellular carcinoma.     |
| Iizuka_progression_G2_G3_dn | IIZUKA_LIVER_CANCER_PROGRESSION_G2_G3_DN | Genes down-regulated during transition from G2 (moderately differentiated tumor, infected with HCV) to G3 (poorly differentiated tumor, infected with HCV) in the development of hepatocellular carcinoma. |

|                              |                                            |                                                                                                                                                                                                                           |
|------------------------------|--------------------------------------------|---------------------------------------------------------------------------------------------------------------------------------------------------------------------------------------------------------------------------|
| lizuka_progression__G2_G3_up | IIZUKA_LIVER_CANCER_PROGRESSION_G2_G3_UP   | Genes up-regulated during transition from G2 (moderately differentiated tumor, infected with HCV) to G3 (poorly differentiated tumor, infected with HCV) in the development of hepatocellular carcinoma.                  |
| lizuka_progression__L0_L1_dn | IIZUKA_LIVER_CANCER_PROGRESSION_L0_L1_DN   | Genes down-regulated during transition from L0 (non-tumor, not infected with HCV) to L1 (non-tumor, infected with HCV) in the development of hepatocellular carcinoma.                                                    |
| lizuka_progression__L0_L1_up | IIZUKA_LIVER_CANCER_PROGRESSION_L0_L1_UP   | Genes up-regulated during transition from L0 (non-tumor, not infected with HCV) to L1 (non-tumor, infected with HCV) in the development of hepatocellular carcinoma.                                                      |
| lizuka_progression__L1_G1_dn | IIZUKA_LIVER_CANCER_PROGRESSION_L1_G1_DN   | Genes down-regulated during transition from L1 (non-tumor, infected with HCV) to G1 (well differentiated tumor, infected with HCV) in the development of hepatocellular carcinoma.                                        |
| lizuka_progression__L1_G1_up | IIZUKA_LIVER_CANCER_PROGRESSION_L1_G1_UP   | Genes up-regulated during transition from L1 (non-tumor, infected with HCV) to G1 (well differentiated tumor, infected with HCV) in the development of hepatocellular carcinoma.                                          |
| Jiang_TIP30_dn               | JIANG_TIP30_TARGETS_DN                     | Down-regulated genes in HepG2 cells (liver cancer) overexpressing an oncogenic variant of tumor suppressor TIP30 [GeneID=10553] compared to its wild type form.                                                           |
| Jiang_TIP30_up               | JIANG_TIP30_TARGETS_UP                     | Up-regulated genes in HepG2 cells (liver cancer) overexpressing an oncogenic variant of tumor suppressor TIP30 [GeneID=10553] compared to its wild type form.                                                             |
| Kaposi_MET_dn                | KAPOSI_LIVER_CANCER_MET_DN                 | Selected down-regulated MET [GeneID=4233] target genes from a classifier of hepatocellular carcinoma (HCC) cases; associated with poor survival.                                                                          |
| Kaposi_MET_up                | KAPOSI_LIVER_CANCER_MET_UP                 | Selected up-regulated MET [GeneID=4233] target genes from a classifier of hepatocellular carcinoma (HCC) cases; associated with poor survival.                                                                            |
| Khetchoumian_TRIM24_dn       | KHETCHOUMIAN_TRIM24_TARGETS_DN             | Retinoic acid-responsive genes down-regulated in hepatocellular carcinoma (HCC) samples of TRIM24 [GeneID=8805] knockout mice.                                                                                            |
| Khetchoumian_TRIM24_up       | KHETCHOUMIAN_TRIM24_TARGETS_UP             | Retinoic acid-responsive genes up-regulated in hepatocellular carcinoma (HCC) samples of TRIM24 [GeneID=8805] knockout mice.                                                                                              |
| Kim_poor_survival_dn         | KIM_LIVER_CANCER_POOR_SURVIVAL_DN          | Genes under-expressed in hepatocellular carcinoma (HCC) with poor survival                                                                                                                                                |
| Kim_poor_survival_up         | KIM_LIVER_CANCER_POOR_SURVIVAL_UP          | Genes over-expressed in hepatocellular carcinoma (HCC) with poor survival                                                                                                                                                 |
| Kurokawa_early_recurrence_dn | KUROKAWA_LIVER_CANCER_EARLY_RECURRENCE_DN  | Genes down-regulated in hepatocellular carcinoma (HCC) with early recurrence.                                                                                                                                             |
| Kurokawa_early_recurrence_up | KUROKAWA_LIVER_CANCER_EARLY_RECURRENCE_UP  | Genes up-regulated in hepatocellular carcinoma (HCC) with early recurrence.                                                                                                                                               |
| Lee_heaptoblast              | LEE_LIVER_CANCER_HEPATOBLAST               | Fig.5, Supplementary Fig.2 Genes overexpressed in human hepatocellular carcinoma with hepatoblast property                                                                                                                |
| Lee_Survival_dn              | LEE_LIVER_CANCER_SURVIVAL_DN               | Genes highly expressed in hepatocellular carcinoma with poor survival.                                                                                                                                                    |
| Lee_Survival_up              | LEE_LIVER_CANCER_SURVIVAL_UP               | Genes highly expressed in hepatocellular carcinoma with good survival.                                                                                                                                                    |
| Liao_HAVE_SOX4               | LIAO_HAVE_SOX4_BINDING_SITES               | Genes up-regulated in the samples with intrahepatic metastatic hepatocellular carcinoma (HCC) vs primary HCC that also have putative binding sites for SOX4 [GeneID=6659].                                                |
| Liao_metastasis              | LIAO_METASTASIS                            | Genes up-regulated in the samples with intrahepatic metastatic hepatocellular carcinoma (HCC) vs primary HCC.                                                                                                             |
| Midorikawa_amplified         | MIDORIKAWA_AMPLIFIED_IN_LIVER_CANCER       | Candidate genes in genomic amplification regions in hepatocellular carcinoma (HCC) samples.                                                                                                                               |
| Minguez_vascular_invasion_dn | MINGUEZ_LIVER_CANCER_VASCULAR_INVASION_DN  | Genes under-expressed in hepatocellular carcinoma (HCC) with vascular invasion.                                                                                                                                           |
| Minguez_vascular_invasion_up | MINGUEZ_LIVER_CANCER_VASCULAR_INVASION_UP  | Genes over-expressed in hepatocellular carcinoma (HCC) with vascular invasion.                                                                                                                                            |
| Patil_liver_cancer           | PATIL_LIVER_CANCER                         | Genes up-regulated in hepatocellular carcinoma (HCC) compared to normal liver samples.                                                                                                                                    |
| Roessler_metastasis_dn       | ROESSLER_LIVER_CANCER_METASTASIS_DN        | Genes down-regulated in liver samples containing tumor thrombi in the major branches of the portal vein at surgery (PT) compared to those from metastasis-free HCC patients (PN) at the time of surgery and at follow-up. |
| Roessler_metastasis_up       | ROESSLER_LIVER_CANCER_METASTASIS_UP        | Genes up-regulated in liver samples containing tumor thrombi in the major branches of the portal vein at surgery (PT) compared to those from metastasis-free HCC patients (PN) at the time of surgery and at follow-up.   |
| Sakai_chronic_hepatitis_dn   | SAKAI_CHRONIC_HEPATITIS_VS_LIVER_CANCER_DN | Selected genes down-regulated in peripheral blood monocytes (PBMC) of patients with hepatocellular carcinoma (HCC) compared to those with chronic hepatitis.                                                              |
| Sakai_chronic_hepatitis_up   | SAKAI_CHRONIC_HEPATITIS_VS_LIVER_CANCER_UP | Selected genes up-regulated in peripheral blood monocytes (PBMC) of patients with hepatocellular carcinoma (HCC) compared to those with chronic hepatitis.                                                                |
| Sakai_monocytes_dn           | SAKAI_TUMOR_INFILTRATING_MONOCYTES_DN      | Selected genes down-regulated in inflammatory monocytes infiltrating hepatocellular carcinoma (HCC).                                                                                                                      |
| Sakai_monocytes_up           | SAKAI_TUMOR_INFILTRATING_MONOCYTES_UP      | Selected genes up-regulated in inflammatory monocytes infiltrating hepatocellular carcinoma (HCC).                                                                                                                        |
| SHETH_VS_TXNIP_LOSS_PAM1     | SHETH_LIVER_CANCER_VS_TXNIP_LOSS_PAM1      | Cluster PAM1: genes up-regulated in hepatocellular carcinoma (HCC) vs normal liver tissue from mice deficient for TXNIP [GeneID=10628].                                                                                   |
| SHETH_VS_TXNIP_LOSS_PAM2     | SHETH_LIVER_CANCER_VS_TXNIP_LOSS_PAM2      | Cluster PAM2: genes up-regulated in hepatocellular carcinoma (HCC) vs normal liver tissue from mice deficient for TXNIP [GeneID=10628].                                                                                   |



|                           |                                       |                                                                                                                                                                |
|---------------------------|---------------------------------------|----------------------------------------------------------------------------------------------------------------------------------------------------------------|
| SHETH_VS_TXNIP_LOSS_PAM3  | SHETH_LIVER_CANCER_VS_TXNIP_LOSS_PAM3 | Cluster PAM3: genes most highly up-regulated in hepatocellular carcinoma (HCC) vs normal liver tissue from mice deficient for TXNIP [GeneID=10628].            |
| SHETH_VS_TXNIP_LOSS_PAM4  | SHETH_LIVER_CANCER_VS_TXNIP_LOSS_PAM4 | Cluster PAM4: genes down-regulated in hepatocellular carcinoma (HCC) vs normal liver tissue from mice deficient for TXNIP [GeneID=10628].                      |
| SHETH_VS_TXNIP_LOSS_PAM5  | SHETH_LIVER_CANCER_VS_TXNIP_LOSS_PAM5 | Cluster PAM5: genes changed exclusively in hepatocellular carcinoma (HCC) samples from 27 month old mice deficient for TXNIP [GeneID=10628].                   |
| SHETH_VS_TXNIP_LOSS_PAM6  | SHETH_LIVER_CANCER_VS_TXNIP_LOSS_PAM6 | Cluster PAM6: genes changed exclusively in normal liver tissue adjacent to hepatocellular carcinoma (HCC) from mice deficient for TXNIP [GeneID=10628].        |
| Smith_liver_cancer        | SMITH_LIVER_CANCER                    | Potential marker genes specifically up-regulated in the majority of hepatocellular carcinoma (HCC) tumors.                                                     |
| Villanueva_KRT19_dn       | VILLANUEVA_LIVER_CANCER_KRT19_DN      | Genes under-expressed in KRT19-positive [GeneID=3880] hepatocellular carcinoma (HCC).                                                                          |
| Villanueva_KRT19_up       | VILLANUEVA_LIVER_CANCER_KRT19_UP      | Genes over-expressed in KRT19-positive [GeneID=3880] hepatocellular carcinoma (HCC).                                                                           |
| Wang_recurrent_dn         | WANG_RECURRENT_LIVER_CANCER_DN        | Genes down-regulated in samples from patients with recurrent hepatocellular carcinoma (HCC).                                                                   |
| Wang_recurrent_up         | WANG_RECURRENT_LIVER_CANCER_UP        | Genes up-regulated in samples from patients with recurrent hepatocellular carcinoma (HCC).                                                                     |
| Woo_recurrence_dn         | WOO_LIVER_CANCER_RECURRENCE_DN        | Genes negatively correlated with recurrence free survival in patients with hepatitis B-related (HBV) hepatocellular carcinoma (HCC).                           |
| Woo_recurrence_up         | WOO_LIVER_CANCER_RECURRENCE_UP        | Genes positively correlated with recurrence free survival in patients with hepatitis B-related (HBV) hepatocellular carcinoma (HCC).                           |
| Wu_HBX_TARGETS_1_dn       | WU_HBX_TARGETS_1_DN                   | Genes down-regulated by expression of HBV X protein (HBVgp3) [GeneID=944566] in SK-Hep-1 cells (hepatocellular carcinoma).                                     |
| Wu_HBX_TARGETS_1_up       | WU_HBX_TARGETS_1_UP                   | Genes up-regulated by expression of HBV X protein (HBVgp3) [GeneID=944566] in SK-Hep-1 cells (hepatocellular carcinoma).                                       |
| Wu_HBX_TARGETS_2_dn       | WU_HBX_TARGETS_2_DN                   | Genes down-regulated by expression of HBV X protein (HBVgp3) [GeneID=944566] in primary hepatocytes.                                                           |
| Wu_HBX_TARGETS_2_up       | WU_HBX_TARGETS_2_UP                   | Genes up-regulated by expression of HBV X protein (HBVgp3) [GeneID=944566] in primary hepatocytes.                                                             |
| Wu_HBX_TARGETS_3_dn       | WU_HBX_TARGETS_3_DN                   | Genes down-regulated by expression of HBV X protein (HBVgp3) [GeneID=944566] both in SK-Hep-1 cells (hepatocellular carcinoma) and normal primary hepatocytes. |
| Wu_HBX_TARGETS_3_up       | WU_HBX_TARGETS_3_UP                   | Genes up-regulated by expression of HBV X protein (HBVgp3) [GeneID=944566] both in SK-Hep-1 cells (hepatocellular carcinoma) and normal primary hepatocytes.   |
| Yamashita_dn              | YAMASHITA_LIVER_CANCER_STEM_CELL_DN   | Genes down-regulated in hepatocellular carcinoma (HCC) cells with hepatic stem cell properties.                                                                |
| Yamashita_up              | YAMASHITA_LIVER_CANCER_STEM_CELL_UP   | Genes up-regulated in hepatocellular carcinoma (HCC) cells with hepatic stem cell properties.                                                                  |
| Yamashita_EPCAM_dn        | YAMASHITA_LIVER_CANCER_WITH_EPCAM_DN  | Down-regulated genes distinguishing hepatocellular carcinoma (HCC) samples positive for EPCAM [GeneID=4072] from the negative ones.                            |
| Yamashita_EPCAM_up        | YAMASHITA_LIVER_CANCER_WITH_EPCAM_UP  | Up-regulated genes distinguishing hepatocellular carcinoma (HCC) samples positive for EPCAM [GeneID=4072] from the negative ones.                              |
| Pinyol_146_Sora_Signature | NA                                    | Molecular predictors of prevention of recurrence in HCC with sorafenib as adjuvant treatment and prognostic factors in the phase 3 STORM trial                 |
| Lachenmayer_CTNNB1_up     | NA                                    | Wnt-Pathway Activation in Two Molecular Classes of Hepatocellular Carcinoma and Experimental Modulation by Sorafenib                                           |
| Lachenmayer_Wnt-TGFb_up   | NA                                    | Wnt-Pathway Activation in Two Molecular Classes of Hepatocellular Carcinoma and Experimental Modulation by Sorafenib                                           |
| Moeini_ICF_signature      | NA                                    | An Immune Gene Expression Signature Associated With Development of Human Hepatocellular Carcinoma Identifies Mice That Respond to Chemopreventive Agents       |
